# Supplementary material for: Untargeted/Targeted 2D Gas Chromatography/Mass Spectrometry Detection of the Total Volatile Tea Metabolome
Source: PubMed Central journal article supplement (PMC6832143; doi:10.3390/molecules24203757), 2019-10-18
Supplement: molecules-24-03757-s001.pdf [file molecules-24-03757-s001.pdf]

## Supplementary material

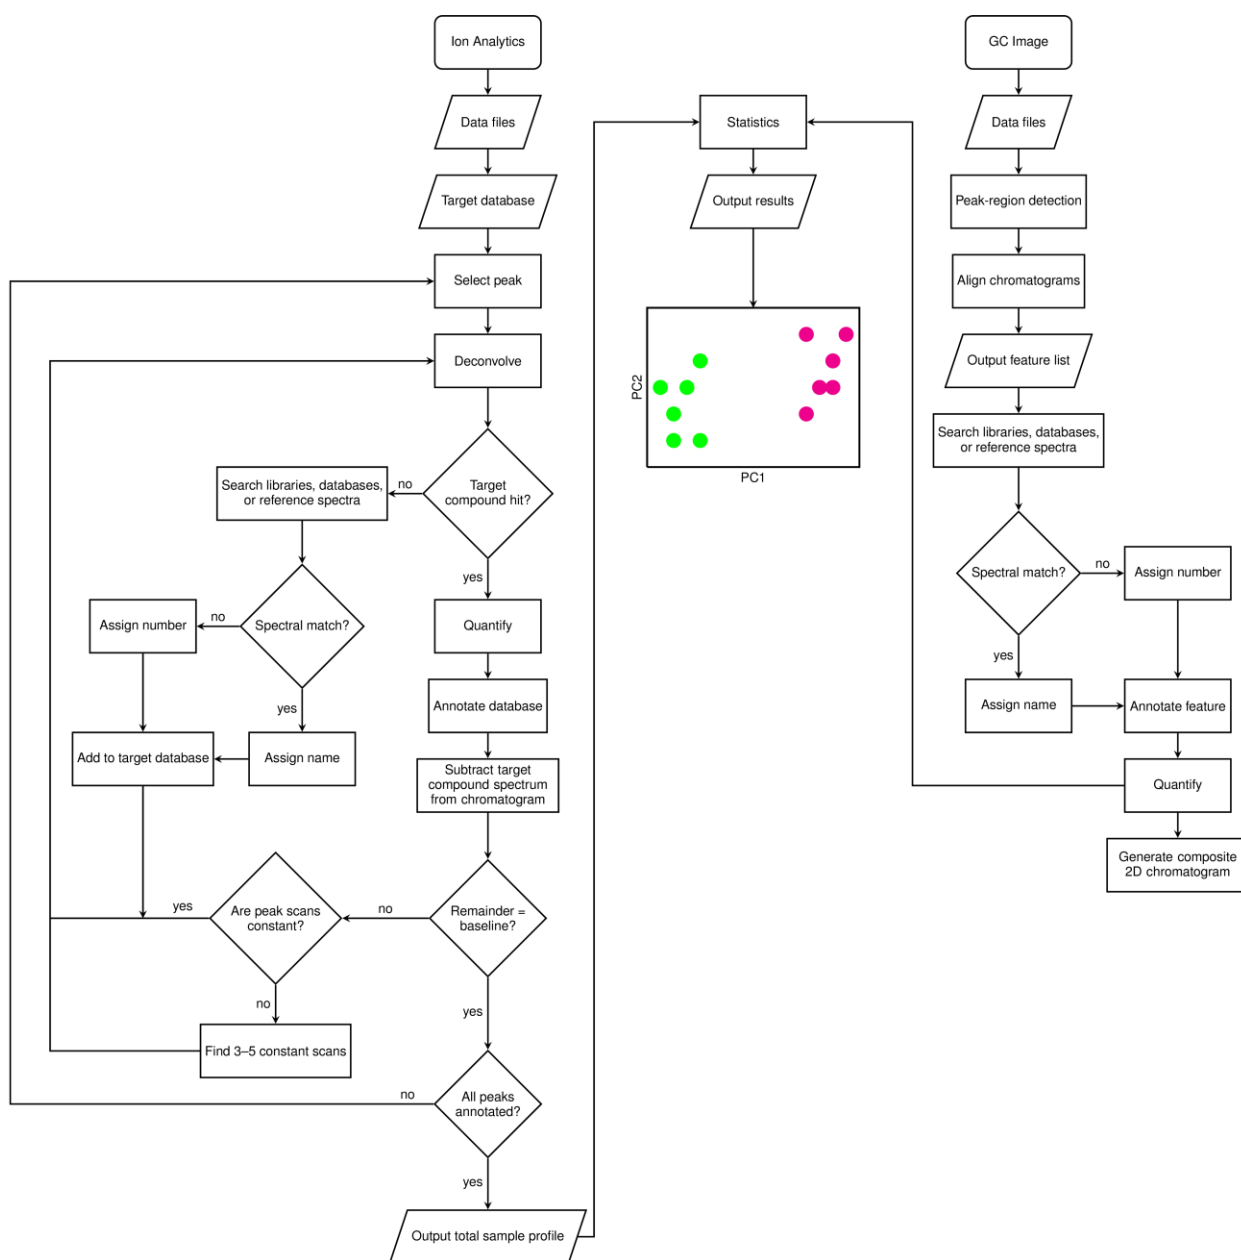

**Figure S1.** Ion Analytics and GC Image workflow schematic for the analysis of targeted and untargeted compounds

**Table S1.** Features detected by GC Image and confirmatory analysis

| Compound Name          | RT 1D (min) | RT 2D (s) | Volume  |         |         |         | Percent Response |       |       |       |
|------------------------|-------------|-----------|---------|---------|---------|---------|------------------|-------|-------|-------|
|                        |             |           | HM_1    | HM_2    | LM_1    | LM_2    | HM_1             | HM_2  | LM_1  | LM_2  |
| (387)                  | 3.6879      | 1.5794    | 128851  | 60764   | 88018   | 59701   | 0.013            | 0.006 | 0.009 | 0.006 |
| (409)                  | 3.6879      | 2.4019    | 199545  | 88818   | 136440  | 85023   | 0.020            | 0.009 | 0.014 | 0.009 |
| (412)                  | 3.6879      | 3.2617    | 186262  | 84481   | 128164  | 82253   | 0.018            | 0.008 | 0.013 | 0.008 |
| (417)                  | 3.6879      | 3.1308    | 69015   | 36185   | 44010   | 31005   | 0.007            | 0.004 | 0.004 | 0.003 |
| (418)                  | 3.6879      | 2.7477    | 179661  | 84264   | 118668  | 78152   | 0.018            | 0.008 | 0.012 | 0.008 |
| (421)                  | 3.6879      | 1.7477    | 127290  | 57034   | 83363   | 49563   | 0.013            | 0.006 | 0.008 | 0.005 |
| (427)                  | 3.6879      | 3.5794    | 152499  | 70770   | 99250   | 62448   | 0.015            | 0.007 | 0.010 | 0.006 |
| (430)                  | 3.6879      | 2.0935    | 113025  | 52871   | 74864   | 46346   | 0.011            | 0.005 | 0.008 | 0.005 |
| (432)                  | 3.6879      | 2.6075    | 92846   | 45619   | 64151   | 41420   | 0.009            | 0.005 | 0.007 | 0.004 |
| (437)                  | 3.6879      | 3.8318    | 128748  | 63624   | 90193   | 58953   | 0.013            | 0.006 | 0.009 | 0.006 |
| (447)                  | 3.6879      | 1.4393    | 124668  | 61680   | 86702   | 58078   | 0.012            | 0.006 | 0.009 | 0.006 |
| (452)                  | 3.6879      | 1.1682    | 78976   | 36996   | 54192   | 34834   | 0.008            | 0.004 | 0.006 | 0.004 |
| (459)                  | 3.6879      | 1.9813    | 46306   | 23913   | 32447   | 19889   | 0.005            | 0.002 | 0.003 | 0.002 |
| (470)                  | 3.6879      | 0.8318    | 43837   | 23413   | 36762   | 20068   | 0.004            | 0.002 | 0.004 | 0.002 |
| (413)                  | 3.7213      | 0.6636    | 186204  | 98510   | 129354  | 88097   | 0.018            | 0.010 | 0.013 | 0.009 |
| (441)                  | 3.7213      | 0.3645    | 99149   | 53767   | 68954   | 49051   | 0.010            | 0.005 | 0.007 | 0.005 |
| (451)                  | 3.7213      | 0.9439    | 80174   | 40913   | 46442   | 36383   | 0.008            | 0.004 | 0.005 | 0.004 |
| (453)                  | 3.7213      | 0.1308    | 84533   | 45512   | 56828   | 40279   | 0.008            | 0.005 | 0.006 | 0.004 |
| (454)                  | 3.7213      | 1.0561    | 45541   | 25234   | 37435   | 22578   | 0.004            | 0.003 | 0.004 | 0.002 |
| 2,3-Butanedione* (11)  | 4.2046      | 0.1028    | 975895  | 3319080 | 2450161 | 1597105 | 0.096            | 0.332 | 0.249 | 0.161 |
| (152)                  | 4.2046      | 3.7290    | 782945  | 166682  | 262750  | 236772  | 0.077            | 0.017 | 0.027 | 0.024 |
| (166)                  | 4.2046      | 3.4019    | 3308398 | 247319  | 392562  | 363584  | 0.327            | 0.025 | 0.040 | 0.037 |
| Dimethyl sulfide (157) | 4.2379      | 1.3364    | 454787  | 366093  | 503736  | 512900  | 0.045            | 0.037 | 0.051 | 0.052 |
| (174)                  | 4.2379      | 2.0561    | 266216  | 206343  | 282585  | 275326  | 0.026            | 0.021 | 0.029 | 0.028 |
| (188)                  | 4.2379      | 1.8411    | 310323  | 219772  | 318514  | 301818  | 0.031            | 0.022 | 0.032 | 0.030 |
| (185)                  | 4.2546      | 2.9065    | 128662  | 96476   | 147371  | 129110  | 0.013            | 0.010 | 0.015 | 0.013 |
| (186)                  | 4.2546      | 2.3925    | 202551  | 155174  | 230483  | 206090  | 0.020            | 0.016 | 0.023 | 0.021 |
| (199)                  | 4.2546      | 2.7196    | 267460  | 195228  | 275545  | 252690  | 0.026            | 0.020 | 0.028 | 0.025 |
| Acetone* (18)          | 4.2713      | 0.6262    | 2133748 | 3695207 | 4015256 | 3767929 | 0.211            | 0.370 | 0.409 | 0.380 |
| (171)                  | 4.2713      | 3.1121    | 283199  | 217459  | 296569  | 306552  | 0.028            | 0.022 | 0.030 | 0.031 |
| Acetic acid* (43)      | 4.5213      | 0.5701    | 190281  | 836705  | 314422  | 557530  | 0.019            | 0.084 | 0.032 | 0.056 |
| (605)                  | 4.5213      | 3.1589    | 29981   | 4908    | 21014   | 21403   | 0.003            | 0.000 | 0.002 | 0.002 |
| (316)                  | 4.6713      | 0.0748    | 83083   | 60523   | 65259   | 55669   | 0.008            | 0.006 | 0.007 | 0.006 |
| (402)                  | 4.7046      | 0.1869    | 61996   | 67618   | 45498   | 35882   | 0.006            | 0.007 | 0.005 | 0.004 |
| (693)                  | 4.7046      | 3.2991    | 27590   | 21369   | 20782   | 17897   | 0.003            | 0.002 | 0.002 | 0.002 |
| (740)                  | 4.7046      | 2.8224    | 64525   | 50529   | 51286   | 40450   | 0.006            | 0.005 | 0.005 | 0.004 |
| (882)                  | 4.7046      | 2.3925    | 34367   | 39687   | 28179   | 20622   | 0.003            | 0.004 | 0.003 | 0.002 |
| (247)                  | 4.7213      | 1.2243    | 93414   | 58750   | 70253   | 66942   | 0.009            | 0.006 | 0.007 | 0.007 |

| Compound Name                 | RT 1D (min) | RT 2D (s) | Volume  |         |         |         | Percent Response |       |       |       |
|-------------------------------|-------------|-----------|---------|---------|---------|---------|------------------|-------|-------|-------|
|                               |             |           | HM_1    | HM_2    | LM_1    | LM_2    | HM_1             | HM_2  | LM_1  | LM_2  |
| (268)                         | 4.7213      | 1.3832    | 115510  | 75901   | 92596   | 96922   | 0.011            | 0.008 | 0.009 | 0.010 |
| (295)                         | 4.7213      | 1.6262    | 137119  | 114526  | 131254  | 123095  | 0.014            | 0.011 | 0.013 | 0.012 |
| (478)                         | 4.7213      | 2.0841    | 46921   | 59746   | 50772   | 44178   | 0.005            | 0.006 | 0.005 | 0.004 |
| 2-Methylfuran (1785)          | 4.7379      | 0.7850    | 670405  | 647660  | 566261  | 605281  | 0.066            | 0.065 | 0.058 | 0.061 |
| Hexane* (26)                  | 4.7379      | 0.6449    | 2890427 | 1301428 | 1335304 | 1299899 | 0.285            | 0.130 | 0.136 | 0.131 |
| (683)                         | 4.7879      | 3.7009    | 30126   | 13653   | 18920   | 17672   | 0.003            | 0.001 | 0.002 | 0.002 |
| (829)                         | 4.7879      | 3.4953    | 43627   | 22156   | 26259   | 23635   | 0.004            | 0.002 | 0.003 | 0.002 |
| (884)                         | 4.8213      | 3.1682    | 30862   | 11499   | 16967   | 14084   | 0.003            | 0.001 | 0.002 | 0.001 |
| (1025)                        | 4.8546      | 2.9813    | 22037   | 11702   | 14121   | 12176   | 0.002            | 0.001 | 0.001 | 0.001 |
| (960)                         | 4.8713      | 2.7103    | 44354   | 18820   | 26047   | 23852   | 0.004            | 0.002 | 0.003 | 0.002 |
| (304)                         | 4.9213      | 0.2243    | 99014   | 86175   | 78431   | 58811   | 0.010            | 0.009 | 0.008 | 0.006 |
| 2-Methyl-1,3-pentadiene (173) | 5.1213      | 0.8318    | 222216  | 176631  | 115439  | 117865  | 0.022            | 0.018 | 0.012 | 0.012 |
| (1178)                        | 5.2213      | 2.7477    | 11509   | 7708    | 8623    | 8545    | 0.001            | 0.001 | 0.001 | 0.001 |
| (357)                         | 5.3546      | 1.8224    | 43442   | 41853   | 50797   | 64046   | 0.004            | 0.004 | 0.005 | 0.006 |
| (358)                         | 5.4213      | 2.7570    | 77858   | 50040   | 86543   | 94049   | 0.008            | 0.005 | 0.009 | 0.009 |
| (389)                         | 5.4213      | 2.6075    | 44035   | 37853   | 53881   | 56154   | 0.004            | 0.004 | 0.005 | 0.006 |
| 2-Methylpentene* (52)         | 5.4379      | 0.8972    | 977558  | 773362  | 947044  | 1001249 | 0.097            | 0.077 | 0.096 | 0.101 |
| (356)                         | 5.4379      | 3.1776    | 105345  | 73620   | 131667  | 133789  | 0.010            | 0.007 | 0.013 | 0.013 |
| (372)                         | 5.4379      | 3.4206    | 45635   | 24782   | 49658   | 50410   | 0.005            | 0.002 | 0.005 | 0.005 |
| 3-Methylbutanal* (39)         | 5.4546      | 0.4019    | 562200  | 589451  | 678859  | 532983  | 0.056            | 0.059 | 0.069 | 0.054 |
| (349)                         | 5.4546      | 3.6822    | 70275   | 40823   | 87949   | 80666   | 0.007            | 0.004 | 0.009 | 0.008 |
| (367)                         | 5.4546      | 3.5701    | 29090   | 15987   | 35551   | 35376   | 0.003            | 0.002 | 0.004 | 0.004 |
| Cyclohexane (19)              | 5.5213      | 0.2056    | 194423  | 79482   | 1509736 | 986937  | 0.019            | 0.008 | 0.154 | 0.099 |
| (368)                         | 5.5213      | 2.3178    | 115435  | 101835  | 138034  | 135268  | 0.011            | 0.010 | 0.014 | 0.014 |
| (400)                         | 5.5379      | 2.2150    | 39065   | 40256   | 52496   | 52373   | 0.004            | 0.004 | 0.005 | 0.005 |
| 1-Penten-3-ol* (44)           | 5.6879      | 0.5701    | 713494  | 775236  | 698782  | 652505  | 0.070            | 0.078 | 0.071 | 0.066 |
| (16)                          | 5.6879      | 1.7850    | 530813  | 1922812 | 2748072 | 1926809 | 0.052            | 0.193 | 0.280 | 0.194 |
| (956)                         | 5.6879      | 3.0280    | 16585   | 14615   | 20661   | 16578   | 0.002            | 0.001 | 0.002 | 0.002 |
| 482 (653)                     | 5.7879      | 0.2243    | 19625   | 66363   | 25858   | 18874   | 0.002            | 0.007 | 0.003 | 0.002 |
| Pentanal* (93)                | 5.8713      | 0.5607    | 301002  | 264778  | 308919  | 205419  | 0.030            | 0.027 | 0.031 | 0.021 |
| (1066)                        | 5.8879      | 3.8411    | 47233   | 17845   | 25552   | 25186   | 0.005            | 0.002 | 0.003 | 0.003 |
| (262)                         | 5.9046      | 1.6729    | 4265904 | 155074  | 174238  | 125238  | 0.421            | 0.016 | 0.018 | 0.013 |
| (1119)                        | 5.9046      | 2.9159    | 33404   | 11414   | 14296   | 15375   | 0.003            | 0.001 | 0.001 | 0.002 |
| (231)                         | 5.9213      | 1.3084    | 168480  | 55364   | 64646   | 113546  | 0.017            | 0.006 | 0.007 | 0.011 |
| (1032)                        | 5.9213      | 3.1028    | 30070   | 10312   | 16393   | 14840   | 0.003            | 0.001 | 0.002 | 0.001 |
| (1081)                        | 5.9213      | 2.6916    | 34485   | 12536   | 16120   | 14081   | 0.003            | 0.001 | 0.002 | 0.001 |
| (1034)                        | 5.9379      | 3.2710    | 34921   | 13578   | 19628   | 17701   | 0.003            | 0.001 | 0.002 | 0.002 |
| (1055)                        | 5.9713      | 3.4766    | 34718   | 14410   | 20558   | 18686   | 0.003            | 0.001 | 0.002 | 0.002 |
| (1068)                        | 5.9879      | 2.4579    | 54653   | 18121   | 21458   | 19647   | 0.005            | 0.002 | 0.002 | 0.002 |
| 2-Ethylfuran* (79)            | 6.0213      | 0.3925    | 665263  | 781653  | 448024  | 324074  | 0.066            | 0.078 | 0.046 | 0.033 |
| (1161)                        | 6.0379      | 2.2430    | 25714   | 9236    | 11335   | 10440   | 0.003            | 0.001 | 0.001 | 0.001 |

| Compound Name               | RT 1D (min) | RT 2D (s) | Volume  |         |         |         | Percent Response |       |       |       |
|-----------------------------|-------------|-----------|---------|---------|---------|---------|------------------|-------|-------|-------|
|                             |             |           | HM_1    | HM_2    | LM_1    | LM_2    | HM_1             | HM_2  | LM_1  | LM_2  |
| (1004)                      | 6.0546      | 0.0654    | 17570   | 7622    | 10510   | 8528    | 0.002            | 0.001 | 0.001 | 0.001 |
| (1503)                      | 6.2379      | 2.7009    | 20973   | 11093   | 12711   | 9974    | 0.002            | 0.001 | 0.001 | 0.001 |
| (1596)                      | 6.2379      | 3.0561    | 13848   | 7509    | 8694    | 7360    | 0.001            | 0.001 | 0.001 | 0.001 |
| 2-Methylbutanal* (293)      | 6.2713      | 0.4299    | 91135   | 124322  | 91680   | 99681   | 0.009            | 0.012 | 0.009 | 0.010 |
| 2-Methylbutanenitrile (535) | 6.3879      | 0.9159    | 96825   | 51935   | 63082   | 44510   | 0.010            | 0.005 | 0.006 | 0.004 |
| (1641)                      | 6.4046      | 2.3178    | 13554   | 6288    | 7605    | 6019    | 0.001            | 0.001 | 0.001 | 0.001 |
| 3-Methylbutanol (825)       | 6.4546      | 0.7850    | 45617   | 31796   | 27596   | 23966   | 0.005            | 0.003 | 0.003 | 0.002 |
| (1613)                      | 6.5213      | 0.0374    | 4781    | 4568    | 3146    | 2656    | 0.000            | 0.000 | 0.000 | 0.000 |
| (1071)                      | 6.5713      | 1.5234    | 81508   | 21598   | 22783   | 19949   | 0.008            | 0.002 | 0.002 | 0.002 |
| (1693)                      | 6.5879      | 2.4860    | 10631   | 6592    | 7511    | 6338    | 0.001            | 0.001 | 0.001 | 0.001 |
| 2-Methyl-2-butenal* (103)   | 6.6379      | 0.9252    | 86515   | 147997  | 47327   | 109925  | 0.009            | 0.015 | 0.005 | 0.011 |
| (1753)                      | 6.6713      | 3.5981    | 11722   | 8543    | 8656    | 7697    | 0.001            | 0.001 | 0.001 | 0.001 |
| (510)                       | 6.6879      | 0.1963    | 24286   | 53708   | 19201   | 45342   | 0.002            | 0.005 | 0.002 | 0.005 |
| (700)                       | 6.6879      | 0.4953    | 14677   | 14884   | 14358   | 15258   | 0.001            | 0.001 | 0.001 | 0.002 |
| (1636)                      | 6.7546      | 2.2897    | 12686   | 8389    | 8393    | 8085    | 0.001            | 0.001 | 0.001 | 0.001 |
| (1226)                      | 6.7713      | 1.4860    | 32337   | 11802   | 11985   | 9356    | 0.003            | 0.001 | 0.001 | 0.001 |
| (E)-3-Penten-2-one (1786)   | 6.7879      | 0.9065    | 237685  | 150522  | 207321  | 147251  | 0.023            | 0.015 | 0.021 | 0.015 |
| (1328)                      | 6.8046      | 1.7290    | 40176   | 26362   | 24966   | 24303   | 0.004            | 0.003 | 0.003 | 0.002 |
| (1681)                      | 6.9213      | 2.0374    | 17682   | 12883   | 13356   | 11263   | 0.002            | 0.001 | 0.001 | 0.001 |
| 2-Methyl-3-pentanone (176)  | 6.9379      | 0.8598    | 93641   | 32544   | 62891   | 24001   | 0.009            | 0.003 | 0.006 | 0.002 |
| Pyridine (1788)             | 6.9379      | 0.9159    | 173102  | 133158  | 120269  | 138777  | 0.017            | 0.013 | 0.012 | 0.014 |
| (1204)                      | 6.9546      | 1.4486    | 33857   | 13460   | 13357   | 11481   | 0.003            | 0.001 | 0.001 | 0.001 |
| (1713)                      | 6.9546      | 2.5421    | 10126   | 6775    | 7255    | 5964    | 0.001            | 0.001 | 0.001 | 0.001 |
| (1300)                      | 6.9879      | 1.6916    | 14805   | 9482    | 9439    | 9151    | 0.001            | 0.001 | 0.001 | 0.001 |
| (1570)                      | 7.0379      | 3.5701    | 16033   | 10001   | 10589   | 9049    | 0.002            | 0.001 | 0.001 | 0.001 |
| Dimethyl disulfide (232)    | 7.0713      | 0.6729    | 114308  | 110100  | 119841  | 130675  | 0.011            | 0.011 | 0.012 | 0.013 |
| (553)                       | 7.1046      | 0.2991    | 18095   | 30764   | 14515   | 26742   | 0.002            | 0.003 | 0.001 | 0.003 |
| (1700)                      | 7.1213      | 2.9346    | 8784    | 7188    | 6671    | 5998    | 0.001            | 0.001 | 0.001 | 0.001 |
| (1697)                      | 7.1879      | 3.7757    | 12543   | 10200   | 10692   | 9582    | 0.001            | 0.001 | 0.001 | 0.001 |
| (1389)                      | 7.2213      | 0.0467    | 3868    | 3315    | 3118    | 3388    | 0.000            | 0.000 | 0.000 | 0.000 |
| Pentanol* (24)              | 7.3546      | 1.0374    | 2296725 | 1922945 | 1315765 | 1195813 | 0.227            | 0.193 | 0.134 | 0.121 |
| (1563)                      | 7.3713      | 3.5140    | 10611   | 8093    | 6230    | 5539    | 0.001            | 0.001 | 0.001 | 0.001 |
| (1083)                      | 7.3879      | 1.8785    | 28560   | 22074   | 20162   | 18062   | 0.003            | 0.002 | 0.002 | 0.002 |
| (1294)                      | 7.3879      | 2.6168    | 30699   | 24684   | 22659   | 22150   | 0.003            | 0.002 | 0.002 | 0.002 |
| (Z)-2-Penten-1-ol* (40)     | 7.4046      | 1.1776    | 336245  | 570626  | 303351  | 303111  | 0.033            | 0.057 | 0.031 | 0.031 |
| (1077)                      | 7.4213      | 2.1776    | 36302   | 32893   | 27037   | 26945   | 0.004            | 0.003 | 0.003 | 0.003 |
| (1238)                      | 7.4379      | 2.4206    | 24254   | 20449   | 18924   | 17244   | 0.002            | 0.002 | 0.002 | 0.002 |
| 311 (71)                    | 7.4546      | 0.9159    | 322980  | 189374  | 190729  | 156028  | 0.032            | 0.019 | 0.019 | 0.016 |
| (972)                       | 7.4546      | 0.4393    | 31491   | 21468   | 21560   | 19780   | 0.003            | 0.002 | 0.002 | 0.002 |
| (468)                       | 7.4713      | 0.2150    | 33780   | 60272   | 27684   | 57913   | 0.003            | 0.006 | 0.003 | 0.006 |
| Toluene* (8)                | 7.4879      | 0.6542    | 2504525 | 2244127 | 2952305 | 2799800 | 0.247            | 0.225 | 0.301 | 0.282 |

| Compound Name                | RT 1D (min) | RT 2D (s) | Volume |        |        |        | Percent Response |       |       |       |
|------------------------------|-------------|-----------|--------|--------|--------|--------|------------------|-------|-------|-------|
|                              |             |           | HM_1   | HM_2   | LM_1   | LM_2   | HM_1             | HM_2  | LM_1  | LM_2  |
| (1704)                       | 7.5379      | 3.5607    | 17393  | 9481   | 13291  | 8850   | 0.002            | 0.001 | 0.001 | 0.001 |
| (1749)                       | 7.5879      | 3.0654    | 14857  | 9101   | 11542  | 8639   | 0.001            | 0.001 | 0.001 | 0.001 |
| (1257)                       | 7.5879      | 0.0561    | 9730   | 7576   | 7590   | 7411   | 0.001            | 0.001 | 0.001 | 0.001 |
| (1751)                       | 7.6046      | 2.6262    | 8922   | 5490   | 7580   | 5762   | 0.001            | 0.001 | 0.001 | 0.001 |
| (1447)                       | 7.6213      | 1.8692    | 10983  | 7012   | 9632   | 6946   | 0.001            | 0.001 | 0.001 | 0.001 |
| (1586)                       | 7.6379      | 3.9159    | 9307   | 4730   | 7459   | 5605   | 0.001            | 0.000 | 0.001 | 0.001 |
| 2,4-Pentanedione* (299)      | 7.7879      | 0.9626    | 80866  | 60706  | 45946  | 42429  | 0.008            | 0.006 | 0.005 | 0.004 |
| (582)                        | 7.8046      | 0.2336    | 19592  | 27780  | 16076  | 29117  | 0.002            | 0.003 | 0.002 | 0.003 |
| (1632)                       | 7.8046      | 1.7944    | 12404  | 8748   | 9362   | 8712   | 0.001            | 0.001 | 0.001 | 0.001 |
| (900)                        | 7.8379      | 1.3178    | 19105  | 15232  | 13558  | 14130  | 0.002            | 0.002 | 0.001 | 0.001 |
| (1473)                       | 7.8379      | 1.5888    | 9106   | 5968   | 8019   | 6147   | 0.001            | 0.001 | 0.001 | 0.001 |
| 2-Hexanone (258)             | 7.9546      | 1.0374    | 113863 | 98623  | 98455  | 87569  | 0.011            | 0.010 | 0.010 | 0.009 |
| (1718)                       | 7.9546      | 1.8411    | 14746  | 8719   | 11276  | 9204   | 0.001            | 0.001 | 0.001 | 0.001 |
| Octene (162)                 | 7.9546      | 0.5421    | 123129 | 118385 | 94246  | 119729 | 0.012            | 0.012 | 0.010 | 0.012 |
| 2-Propylfuran (1787)         | 7.9713      | 0.6729    | 51992  | 49367  | 37309  | 37788  | 0.005            | 0.005 | 0.004 | 0.004 |
| (1609)                       | 7.9879      | 2.7664    | 9314   | 6413   | 7929   | 7374   | 0.001            | 0.001 | 0.001 | 0.001 |
| (1649)                       | 8.0213      | 0.0467    | 3020   | 2198   | 1883   | 1868   | 0.000            | 0.000 | 0.000 | 0.000 |
| (513)                        | 8.1546      | 0.2056    | 15614  | 29018  | 12009  | 31740  | 0.002            | 0.003 | 0.001 | 0.003 |
| Octane* (42)                 | 8.2379      | 0.4766    | 743110 | 714146 | 647031 | 630756 | 0.073            | 0.072 | 0.066 | 0.064 |
| (1516)                       | 8.2379      | 2.1402    | 18623  | 11985  | 12609  | 11219  | 0.002            | 0.001 | 0.001 | 0.001 |
| 4-Methyl-3-penten-2-one (34) | 8.2713      | 1.0280    | 860595 | 779980 | 804450 | 663285 | 0.085            | 0.078 | 0.082 | 0.067 |
| (576)                        | 8.2713      | 0.2056    | 13492  | 18040  | 10373  | 17315  | 0.001            | 0.002 | 0.001 | 0.002 |
| (1571)                       | 8.2713      | 1.9065    | 8939   | 7004   | 7138   | 5604   | 0.001            | 0.001 | 0.001 | 0.001 |
| (1690)                       | 8.4379      | 2.3458    | 8690   | 5400   | 7074   | 5378   | 0.001            | 0.001 | 0.001 | 0.001 |
| (629)                        | 8.4546      | 0.2617    | 19088  | 25853  | 15537  | 26967  | 0.002            | 0.003 | 0.002 | 0.003 |
| (E)-4-Octene (142)           | 8.6046      | 0.5701    | 76847  | 107894 | 66358  | 81252  | 0.008            | 0.011 | 0.007 | 0.008 |
| (651)                        | 8.6713      | 0.1869    | 15351  | 26043  | 14322  | 24427  | 0.002            | 0.003 | 0.001 | 0.002 |
| Hexanal* (76)                | 8.6879      | 0.9439    | 201049 | 91580  | 326102 | 230426 | 0.020            | 0.009 | 0.033 | 0.023 |
| (1573)                       | 8.7213      | 1.8598    | 24756  | 19238  | 18103  | 17680  | 0.002            | 0.002 | 0.002 | 0.002 |
| (1667)                       | 8.7213      | 3.8972    | 5370   | 4555   | 4878   | 4716   | 0.001            | 0.000 | 0.000 | 0.000 |
| (85)                         | 8.7546      | 1.1682    | 79656  | 194685 | 39834  | 86799  | 0.008            | 0.019 | 0.004 | 0.009 |
| (1354)                       | 8.7546      | 1.5234    | 18740  | 17479  | 14739  | 14273  | 0.002            | 0.002 | 0.002 | 0.001 |
| 2-Ethyl-1H-Pyrrole (88)      | 8.7713      | 1.0935    | 371262 | 278090 | 160907 | 161683 | 0.037            | 0.028 | 0.016 | 0.016 |
| 2-Ethyl-5-methylfuran (110)  | 8.8379      | 0.5327    | 490309 | 367439 | 402252 | 350689 | 0.048            | 0.037 | 0.041 | 0.035 |
| (718)                        | 8.9713      | 0.1402    | 6920   | 14992  | 5437   | 13923  | 0.001            | 0.002 | 0.001 | 0.001 |
| 3-Ethyl-1H-pyrrole (479)     | 9.0379      | 0.9907    | 62652  | 54064  | 47953  | 38200  | 0.006            | 0.005 | 0.005 | 0.004 |
| 2-Methylpyrazine (1342)      | 9.0546      | 1.4299    | 12607  | 12944  | 8389   | 8190   | 0.001            | 0.001 | 0.001 | 0.001 |
| 1,3-Octadiene (204)          | 9.0713      | 0.6729    | 85461  | 67318  | 103399 | 80048  | 0.008            | 0.007 | 0.011 | 0.008 |
| (1360)                       | 9.1379      | 2.8224    | 15351  | 16137  | 12238  | 14781  | 0.002            | 0.002 | 0.001 | 0.001 |
| 3-Methylbutanoic acid (330)  | 9.1546      | 2.4673    | 57904  | 48788  | 38334  | 51323  | 0.006            | 0.005 | 0.004 | 0.005 |
| (611)                        | 9.1879      | 0.1776    | 12590  | 18234  | 10260  | 20020  | 0.001            | 0.002 | 0.001 | 0.002 |

| Compound Name                       | RT 1D (min) | RT 2D (s) | Volume  |         |        |        | Percent Response |       |       |       |
|-------------------------------------|-------------|-----------|---------|---------|--------|--------|------------------|-------|-------|-------|
|                                     |             |           | HM_1    | HM_2    | LM_1   | LM_2   | HM_1             | HM_2  | LM_1  | LM_2  |
| Butyl acetate (583)                 | 9.2379      | 0.9159    | 46440   | 39502   | 44795  | 31703  | 0.005            | 0.004 | 0.005 | 0.003 |
| 2-Methyl-2-pentenal* (507)          | 9.2879      | 1.2617    | 31239   | 35749   | 18029  | 21720  | 0.003            | 0.004 | 0.002 | 0.002 |
| (1330)                              | 9.3546      | 1.9626    | 10933   | 9598    | 8063   | 8594   | 0.001            | 0.001 | 0.001 | 0.001 |
| (1386)                              | 9.3546      | 0.3738    | 10076   | 7953    | 7279   | 7891   | 0.001            | 0.001 | 0.001 | 0.001 |
| Furfural* (877)                     | 9.4046      | 1.7570    | 43277   | 34596   | 27507  | 25917  | 0.004            | 0.003 | 0.003 | 0.003 |
| (382)                               | 9.4046      | 0.4953    | 60597   | 42461   | 44372  | 43060  | 0.006            | 0.004 | 0.005 | 0.004 |
| (429)                               | 9.4046      | 1.1776    | 49674   | 32383   | 22219  | 21891  | 0.005            | 0.003 | 0.002 | 0.002 |
| (1217)                              | 9.4379      | 0.1682    | 7409    | 8081    | 6004   | 8969   | 0.001            | 0.001 | 0.001 | 0.001 |
| (1759)                              | 9.4546      | 3.0561    | 5434    | 5091    | 4197   | 4456   | 0.001            | 0.001 | 0.000 | 0.000 |
| 2-Methylbutanoic acid (328)         | 9.5046      | 2.4766    | 60453   | 54212   | 63629  | 58688  | 0.006            | 0.005 | 0.006 | 0.006 |
| (498)                               | 9.5546      | 1.0374    | 31812   | 23600   | 36841  | 30737  | 0.003            | 0.002 | 0.004 | 0.003 |
| (E)-2-Hexenal* (1403)               | 9.6046      | 1.5421    | 11030   | 8298    | 8605   | 7633   | 0.001            | 0.001 | 0.001 | 0.001 |
| (1278)                              | 9.6379      | 0.1682    | 19102   | 19649   | 13745  | 21122  | 0.002            | 0.002 | 0.001 | 0.002 |
| (1205)                              | 9.6879      | 1.4112    | 22421   | 18658   | 14544  | 16142  | 0.002            | 0.002 | 0.001 | 0.002 |
| (396)                               | 9.6879      | 0.4860    | 57945   | 40772   | 41585  | 42619  | 0.006            | 0.004 | 0.004 | 0.004 |
| (587)                               | 9.6879      | 1.9065    | 29698   | 27769   | 27128  | 25499  | 0.003            | 0.003 | 0.003 | 0.003 |
| 2,5,5-Trimethyl-1-hexen-3-yne (138) | 9.7879      | 0.7103    | 150255  | 138766  | 155999 | 143963 | 0.015            | 0.014 | 0.016 | 0.015 |
| (1741)                              | 9.8213      | 1.3832    | 9355    | 5682    | 5727   | 5067   | 0.001            | 0.001 | 0.001 | 0.001 |
| (426)                               | 9.9546      | 0.4673    | 24326   | 24662   | 23227  | 22412  | 0.002            | 0.002 | 0.002 | 0.002 |
| 2-Furanmethanol (893)               | 10.0546     | 2.1495    | 63385   | 56974   | 14761  | 16168  | 0.006            | 0.006 | 0.002 | 0.002 |
| (955)                               | 10.0546     | 2.2897    | 19692   | 22695   | 7579   | 10071  | 0.002            | 0.002 | 0.001 | 0.001 |
| (Z)-3-Hexen-1-ol (302)              | 10.0879     | 1.5234    | 1594426 | 1619555 | 83937  | 82808  | 0.157            | 0.162 | 0.009 | 0.008 |
| (446)                               | 10.1213     | 0.4393    | 68414   | 58695   | 46243  | 50801  | 0.007            | 0.006 | 0.005 | 0.005 |
| (1633)                              | 10.1213     | 2.5140    | 30543   | 29314   | 13758  | 16244  | 0.003            | 0.003 | 0.001 | 0.002 |
| 2-Allylfuran (363)                  | 10.1379     | 1.0280    | 49511   | 51088   | 24345  | 39929  | 0.005            | 0.005 | 0.002 | 0.004 |
| 10 (476)                            | 10.1713     | 0.9252    | 57562   | 45437   | 31109  | 38899  | 0.006            | 0.005 | 0.003 | 0.004 |
| (1722)                              | 10.2213     | 0.1589    | 16897   | 16301   | 9038   | 10347  | 0.002            | 0.002 | 0.001 | 0.001 |
| 1,3-trans,5-cis-octatriene (364)    | 10.3046     | 0.7477    | 40851   | 36289   | 33081  | 32917  | 0.004            | 0.004 | 0.003 | 0.003 |
| (193)                               | 10.4379     | 0.9813    | 76452   | 65686   | 59992  | 87406  | 0.008            | 0.007 | 0.006 | 0.009 |
| (484)                               | 10.4379     | 0.4299    | 62221   | 56248   | 49001  | 48066  | 0.006            | 0.006 | 0.005 | 0.005 |
| (1770)                              | 10.4879     | 3.5981    | 5139    | 4790    | 4070   | 4321   | 0.001            | 0.000 | 0.000 | 0.000 |
| (E)-2-Hexen-1-ol* (314)             | 10.5046     | 1.5421    | 502173  | 522555  | 45930  | 51257  | 0.050            | 0.052 | 0.005 | 0.005 |
| Ethylbenzene* (77)                  | 10.6713     | 0.9907    | 137074  | 124066  | 98950  | 184202 | 0.014            | 0.012 | 0.010 | 0.019 |
| (1114)                              | 10.6879     | 2.8224    | 29560   | 35958   | 14928  | 20153  | 0.003            | 0.004 | 0.002 | 0.002 |
| (495)                               | 10.7046     | 0.4112    | 71325   | 63637   | 57976  | 58630  | 0.007            | 0.006 | 0.006 | 0.006 |
| (698)                               | 10.7046     | 1.4019    | 57905   | 53916   | 36039  | 25574  | 0.006            | 0.005 | 0.004 | 0.003 |
| (1254)                              | 10.7546     | 0.7009    | 10239   | 10372   | 10541  | 8388   | 0.001            | 0.001 | 0.001 | 0.001 |
| Pentanoic acid* (1783)              | 10.8046     | 2.8037    | 11550   | 7009    | 8653   | 6320   | 0.001            | 0.001 | 0.001 | 0.001 |
| 1-Hexanol* (1232)                   | 10.8546     | 1.4673    | 15092   | 14426   | 9307   | 9613   | 0.001            | 0.001 | 0.001 | 0.001 |
| (1019)                              | 10.9213     | 1.3178    | 19953   | 17926   | 14242  | 12248  | 0.002            | 0.002 | 0.001 | 0.001 |
| p-Xylene (147)                      | 10.9379     | 0.9720    | 108196  | 96977   | 202266 | 106986 | 0.011            | 0.010 | 0.021 | 0.011 |

| Compound Name               | RT 1D (min) | RT 2D (s) | Volume  |         |         |         | Percent Response |       |       |       |
|-----------------------------|-------------|-----------|---------|---------|---------|---------|------------------|-------|-------|-------|
|                             |             |           | HM_1    | HM_2    | LM_1    | LM_2    | HM_1             | HM_2  | LM_1  | LM_2  |
| (511)                       | 11.1213     | 0.3832    | 40063   | 36722   | 34964   | 36942   | 0.004            | 0.004 | 0.004 | 0.004 |
| (235)                       | 11.1379     | 0.8598    | 34862   | 29041   | 78748   | 60235   | 0.003            | 0.003 | 0.008 | 0.006 |
| (282)                       | 11.2213     | 0.9813    | 40836   | 46454   | 43322   | 46710   | 0.004            | 0.005 | 0.004 | 0.005 |
| (565)                       | 11.2546     | 1.4579    | 33183   | 32691   | 9936    | 15107   | 0.003            | 0.003 | 0.001 | 0.002 |
| (536)                       | 11.2879     | 0.3738    | 20752   | 17097   | 17209   | 16919   | 0.002            | 0.002 | 0.002 | 0.002 |
| (620)                       | 11.3546     | 0.7757    | 19595   | 18649   | 25417   | 20477   | 0.002            | 0.002 | 0.003 | 0.002 |
| 2-Heptanone* (100)          | 11.4046     | 1.4579    | 230898  | 202378  | 33591   | 152491  | 0.023            | 0.020 | 0.003 | 0.015 |
| 2(5H)-Furanone (521)        | 11.4879     | 0.3645    | 39318   | 34991   | 23915   | 32095   | 0.004            | 0.004 | 0.002 | 0.003 |
| 2-Butylfuran (230)          | 11.5379     | 0.9907    | 90756   | 87645   | 64781   | 57373   | 0.009            | 0.009 | 0.007 | 0.006 |
| Methoxy phenyl oxime (132)  | 11.5713     | 3.8972    | 2257133 | 163468  | 208208  | 138832  | 0.223            | 0.016 | 0.021 | 0.014 |
| (622)                       | 11.5879     | 2.0187    | 31207   | 28941   | 23856   | 33652   | 0.003            | 0.003 | 0.002 | 0.003 |
| Styrene* (9)                | 11.6046     | 1.2056    | 1093559 | 1088635 | 2623663 | 2585436 | 0.108            | 0.109 | 0.267 | 0.261 |
| (1348)                      | 11.6379     | 2.3458    | 10426   | 8096    | 7586    | 9403    | 0.001            | 0.001 | 0.001 | 0.001 |
| (1401)                      | 11.6379     | 2.5607    | 9867    | 8001    | 6012    | 7965    | 0.001            | 0.001 | 0.001 | 0.001 |
| (1521)                      | 11.6713     | 2.8879    | 18094   | 14709   | 13045   | 15465   | 0.002            | 0.001 | 0.001 | 0.002 |
| (554)                       | 11.7379     | 0.3645    | 31494   | 16931   | 17249   | 14518   | 0.003            | 0.002 | 0.002 | 0.001 |
| (89)                        | 11.7713     | 0.7290    | 180056  | 145114  | 183583  | 186246  | 0.018            | 0.015 | 0.019 | 0.019 |
| (1483)                      | 11.7879     | 2.1589    | 8311    | 6881    | 8527    | 6457    | 0.001            | 0.001 | 0.001 | 0.001 |
| Heptanal* (156)             | 11.8046     | 1.4766    | 223059  | 195538  | 110780  | 98815   | 0.022            | 0.020 | 0.011 | 0.010 |
| (579)                       | 11.9546     | 0.3364    | 24192   | 20645   | 22066   | 19814   | 0.002            | 0.002 | 0.002 | 0.002 |
| (592)                       | 12.0379     | 0.3364    | 22583   | 18196   | 17959   | 19826   | 0.002            | 0.002 | 0.002 | 0.002 |
| Nonane (1341)               | 12.0379     | 0.7944    | 14199   | 12619   | 34406   | 11827   | 0.001            | 0.001 | 0.004 | 0.001 |
| 2-Heptanol* (431)           | 12.0713     | 1.6449    | 23601   | 23006   | 23969   | 33612   | 0.002            | 0.002 | 0.002 | 0.003 |
| (1322)                      | 12.1213     | 1.9439    | 9855    | 8178    | 7740    | 8595    | 0.001            | 0.001 | 0.001 | 0.001 |
| 483 (58)                    | 12.1546     | 1.1495    | 163126  | 150516  | 462717  | 409033  | 0.016            | 0.015 | 0.047 | 0.041 |
| (1343)                      | 12.2213     | 0.8224    | 8596    | 9308    | 9180    | 8403    | 0.001            | 0.001 | 0.001 | 0.001 |
| Amyl acetate (395)          | 12.3046     | 1.3084    | 71965   | 66025   | 43574   | 35991   | 0.007            | 0.007 | 0.004 | 0.004 |
| Propylpropanoate (301)      | 12.3379     | 1.1121    | 36590   | 34412   | 146171  | 58219   | 0.004            | 0.003 | 0.015 | 0.006 |
| 2-Acetylfuran (463)         | 12.3546     | 2.0467    | 55760   | 49715   | 35830   | 35759   | 0.006            | 0.005 | 0.004 | 0.004 |
| (504)                       | 12.3879     | 2.0000    | 24946   | 19010   | 13185   | 16713   | 0.002            | 0.002 | 0.001 | 0.002 |
| Butyrolactone* (567)        | 12.4879     | 3.6262    | 78479   | 53428   | 34239   | 37539   | 0.008            | 0.005 | 0.003 | 0.004 |
| (1456)                      | 12.5213     | 0.7944    | 8309    | 7793    | 6832    | 6889    | 0.001            | 0.001 | 0.001 | 0.001 |
| (1365)                      | 12.5713     | 1.5047    | 15102   | 13893   | 9473    | 10441   | 0.001            | 0.001 | 0.001 | 0.001 |
| 484 (410)                   | 12.5879     | 1.1215    | 76994   | 69278   | 94024   | 80343   | 0.008            | 0.007 | 0.010 | 0.008 |
| (925)                       | 12.5879     | 0.0935    | 15044   | 12938   | 11072   | 12464   | 0.001            | 0.001 | 0.001 | 0.001 |
| (1402)                      | 12.5879     | 1.9720    | 20862   | 19378   | 20573   | 16183   | 0.002            | 0.002 | 0.002 | 0.002 |
| (1750)                      | 12.6046     | 0.6449    | 9451    | 7879    | 7724    | 7795    | 0.001            | 0.001 | 0.001 | 0.001 |
| 2,5-Dimethyl-pyrazine (588) | 12.7879     | 1.2804    | 18661   | 18776   | 10203   | 14902   | 0.002            | 0.002 | 0.001 | 0.002 |
| (1187)                      | 12.8213     | 1.5701    | 12268   | 12750   | 8571    | 10498   | 0.001            | 0.001 | 0.001 | 0.001 |
| (733)                       | 12.9879     | 1.4299    | 17312   | 14656   | 16795   | 16075   | 0.002            | 0.001 | 0.002 | 0.002 |
| (1135)                      | 13.0046     | 1.5607    | 10549   | 9631    | 5909    | 6480    | 0.001            | 0.001 | 0.001 | 0.001 |

| Compound Name                | RT 1D (min) | RT 2D (s) | Volume  |         |        |        | Percent Response |       |       |       |
|------------------------------|-------------|-----------|---------|---------|--------|--------|------------------|-------|-------|-------|
|                              |             |           | HM_1    | HM_2    | LM_1   | LM_2   | HM_1             | HM_2  | LM_1  | LM_2  |
| (1612)                       | 13.0046     | 0.7477    | 6949    | 6344    | 7053   | 6752   | 0.001            | 0.001 | 0.001 | 0.001 |
| (1267)                       | 13.0546     | 2.0467    | 10038   | 10207   | 8840   | 9754   | 0.001            | 0.001 | 0.001 | 0.001 |
| (442)                        | 13.0713     | 0.9813    | 59157   | 52762   | 63151  | 65444  | 0.006            | 0.005 | 0.006 | 0.007 |
| (1706)                       | 13.1046     | 1.7290    | 9801    | 7796    | 7974   | 8013   | 0.001            | 0.001 | 0.001 | 0.001 |
| (1728)                       | 13.1379     | 1.8785    | 6584    | 5523    | 5848   | 5436   | 0.001            | 0.001 | 0.001 | 0.001 |
| 485 (111)                    | 13.3379     | 1.2150    | 163633  | 153665  | 89674  | 136446 | 0.016            | 0.015 | 0.009 | 0.014 |
| (Z)-4-Heptenal* (1105)       | 13.4046     | 1.8598    | 18945   | 18584   | 11564  | 13877  | 0.002            | 0.002 | 0.001 | 0.001 |
| $\alpha$ -Pinene (119)       | 13.4046     | 0.9159    | 109318  | 104483  | 92958  | 119911 | 0.011            | 0.010 | 0.009 | 0.012 |
| (1284)                       | 13.5379     | 1.6449    | 22741   | 18819   | 17761  | 17077  | 0.002            | 0.002 | 0.002 | 0.002 |
| 3,5-Dimethylphenol (645)     | 13.5713     | 0.9159    | 12481   | 10312   | 61197  | 14441  | 0.001            | 0.001 | 0.006 | 0.001 |
| 486 (105)                    | 13.6379     | 1.2243    | 264567  | 258948  | 223881 | 217243 | 0.026            | 0.026 | 0.023 | 0.022 |
| (677)                        | 13.7879     | 0.9439    | 15568   | 14640   | 18154  | 15924  | 0.002            | 0.001 | 0.002 | 0.002 |
| 3-Isopropylcyclohexene (475) | 13.9213     | 1.1963    | 27163   | 31313   | 41021  | 32530  | 0.003            | 0.003 | 0.004 | 0.003 |
| 316 (616)                    | 13.9713     | 2.1121    | 38607   | 21631   | 11399  | 19302  | 0.004            | 0.002 | 0.001 | 0.002 |
| (1091)                       | 14.0713     | 2.2804    | 12640   | 11171   | 8565   | 12556  | 0.001            | 0.001 | 0.001 | 0.001 |
| Camphene (343)               | 14.1213     | 1.0000    | 60520   | 57633   | 56916  | 50487  | 0.006            | 0.006 | 0.006 | 0.005 |
| 6-Methyl-2-heptanone (280)   | 14.2046     | 1.6168    | 37027   | 32147   | 33132  | 41115  | 0.004            | 0.003 | 0.003 | 0.004 |
| Propylbenzene (353)          | 14.2379     | 1.3084    | 36751   | 34632   | 33949  | 38517  | 0.004            | 0.003 | 0.003 | 0.004 |
| (E)-2-Heptenal* (98)         | 14.2713     | 1.9159    | 130923  | 108902  | 180234 | 151932 | 0.013            | 0.011 | 0.018 | 0.015 |
| (1784)                       | 14.2879     | 3.0280    | 5314    | 5150    | 4527   | 4944   | 0.001            | 0.001 | 0.000 | 0.000 |
| (1012)                       | 14.3213     | 2.2710    | 8270    | 7578    | 6205   | 8221   | 0.001            | 0.001 | 0.001 | 0.001 |
| (728)                        | 14.3713     | 1.1121    | 22155   | 22726   | 26137  | 14894  | 0.002            | 0.002 | 0.003 | 0.002 |
| (419)                        | 14.4379     | 1.3084    | 22286   | 21192   | 15315  | 21961  | 0.002            | 0.002 | 0.002 | 0.002 |
| (398)                        | 14.4713     | 0.8411    | 35268   | 32404   | 31085  | 31626  | 0.003            | 0.003 | 0.003 | 0.003 |
| (1566)                       | 14.5213     | 3.7664    | 6888    | 6021    | 5269   | 6219   | 0.001            | 0.001 | 0.001 | 0.001 |
| (1501)                       | 14.5713     | 3.5794    | 13098   | 11297   | 8888   | 10561  | 0.001            | 0.001 | 0.001 | 0.001 |
| (1558)                       | 14.5713     | 3.2710    | 9791    | 9852    | 5243   | 7201   | 0.001            | 0.001 | 0.001 | 0.001 |
| Benzaldehyde* (32)           | 14.5879     | 2.0654    | 1583428 | 1484686 | 412206 | 765152 | 0.156            | 0.149 | 0.042 | 0.077 |
| (1355)                       | 14.6046     | 3.0280    | 9850    | 8655    | 6737   | 8407   | 0.001            | 0.001 | 0.001 | 0.001 |
| p-Ethyltoluene (240)         | 14.6046     | 1.2336    | 60034   | 59367   | 76619  | 70530  | 0.006            | 0.006 | 0.008 | 0.007 |
| (1171)                       | 14.6213     | 2.8131    | 13027   | 12715   | 9537   | 10648  | 0.001            | 0.001 | 0.001 | 0.001 |
| (1477)                       | 14.6546     | 0.1776    | 24268   | 22892   | 17037  | 21025  | 0.002            | 0.002 | 0.002 | 0.002 |
| Heptanol* (298)              | 14.7546     | 1.8598    | 59265   | 70591   | 57200  | 49337  | 0.006            | 0.007 | 0.006 | 0.005 |
| (143)                        | 14.7546     | 2.0374    | 109859  | 141270  | 406104 | 83733  | 0.011            | 0.014 | 0.041 | 0.008 |
| m-Ethyltoluene (527)         | 14.8879     | 1.2523    | 28588   | 27231   | 22914  | 27245  | 0.003            | 0.003 | 0.002 | 0.003 |
| (1197)                       | 14.9546     | 3.9065    | 8735    | 9252    | 3478   | 5506   | 0.001            | 0.001 | 0.000 | 0.001 |
| (1463)                       | 14.9546     | 0.5514    | 11944   | 12231   | 7517   | 9683   | 0.001            | 0.001 | 0.001 | 0.001 |
| Hexanoic acid* (116)         | 14.9713     | 3.1776    | 557248  | 593497  | 155220 | 231392 | 0.055            | 0.059 | 0.016 | 0.023 |
| (1194)                       | 14.9713     | 0.2056    | 17388   | 17113   | 8025   | 12105  | 0.002            | 0.002 | 0.001 | 0.001 |
| (938)                        | 15.0213     | 2.7103    | 13796   | 12660   | 9808   | 12484  | 0.001            | 0.001 | 0.001 | 0.001 |
| (1062)                       | 15.0213     | 2.9626    | 15169   | 17192   | 11715  | 9520   | 0.001            | 0.002 | 0.001 | 0.001 |



| Compound Name                        | RT 1D (min) | RT 2D (s) | Volume  |         |         |         | Percent Response |       |       |       |
|--------------------------------------|-------------|-----------|---------|---------|---------|---------|------------------|-------|-------|-------|
|                                      |             |           | HM_1    | HM_2    | LM_1    | LM_2    | HM_1             | HM_2  | LM_1  | LM_2  |
| 3,5,5-Trimethyl-2-hexene (14)        | 15.0379     | 1.8224    | 1274529 | 1228935 | 313621  | 1371267 | 0.126            | 0.123 | 0.032 | 0.138 |
| (641)                                | 15.0379     | 0.8598    | 38677   | 36887   | 27175   | 32817   | 0.004            | 0.004 | 0.003 | 0.003 |
| (324)                                | 15.0713     | 1.5794    | 43841   | 34137   | 37267   | 36103   | 0.004            | 0.003 | 0.004 | 0.004 |
| 487 (331)                            | 15.1213     | 1.1402    | 38559   | 37422   | 28419   | 35738   | 0.004            | 0.004 | 0.003 | 0.004 |
| (602)                                | 15.1879     | 3.0374    | 20263   | 19047   | 16833   | 16759   | 0.002            | 0.002 | 0.002 | 0.002 |
| (1164)                               | 15.2213     | 3.9626    | 4579    | 4637    | 4226    | 4203    | 0.000            | 0.000 | 0.000 | 0.000 |
| (615)                                | 15.2379     | 3.1495    | 32810   | 32644   | 26057   | 27422   | 0.003            | 0.003 | 0.003 | 0.003 |
| 1-Octen-3-ol* (6)                    | 15.2713     | 1.7944    | 3125117 | 3070566 | 2298677 | 3974897 | 0.309            | 0.307 | 0.234 | 0.401 |
| (383)                                | 15.2713     | 2.5327    | 33439   | 36763   | 38745   | 39306   | 0.003            | 0.004 | 0.004 | 0.004 |
| (414)                                | 15.2713     | 2.6916    | 30811   | 35703   | 32855   | 37516   | 0.003            | 0.004 | 0.003 | 0.004 |
| (1024)                               | 15.2713     | 3.5421    | 13757   | 13599   | 11491   | 12013   | 0.001            | 0.001 | 0.001 | 0.001 |
| (1072)                               | 15.2879     | 3.8411    | 18875   | 18038   | 16549   | 16989   | 0.002            | 0.002 | 0.002 | 0.002 |
| (1185)                               | 15.3379     | 3.6262    | 8589    | 6646    | 7751    | 6475    | 0.001            | 0.001 | 0.001 | 0.001 |
| Phenol (625)                         | 15.3379     | 0.4579    | 83043   | 92402   | 36066   | 20102   | 0.008            | 0.009 | 0.004 | 0.002 |
| $\beta$ -Pinene* (228)               | 15.3546     | 1.0467    | 49700   | 48662   | 45018   | 50580   | 0.005            | 0.005 | 0.005 | 0.005 |
| (287)                                | 15.3546     | 0.6355    | 121928  | 87854   | 35209   | 59345   | 0.012            | 0.009 | 0.004 | 0.006 |
| 2,3-Octanedione (51)                 | 15.4213     | 1.7009    | 281718  | 325961  | 3162768 | 364169  | 0.028            | 0.033 | 0.322 | 0.037 |
| (519)                                | 15.4379     | 1.3925    | 25162   | 23293   | 31152   | 25934   | 0.002            | 0.002 | 0.003 | 0.003 |
| (1249)                               | 15.4379     | 2.9533    | 9115    | 8563    | 9533    | 8023    | 0.001            | 0.001 | 0.001 | 0.001 |
| (226)                                | 15.4546     | 1.9159    | 41739   | 44104   | 35264   | 38684   | 0.004            | 0.004 | 0.004 | 0.004 |
| cis-2,6-Dimethyl-2,6-octadiene (246) | 15.6379     | 1.0093    | 92685   | 87588   | 49149   | 51608   | 0.009            | 0.009 | 0.005 | 0.005 |
| (1201)                               | 15.6379     | 2.8224    | 21005   | 19416   | 13762   | 13846   | 0.002            | 0.002 | 0.001 | 0.001 |
| 101 (890)                            | 15.6713     | 2.5140    | 27659   | 25791   | 17516   | 16876   | 0.003            | 0.003 | 0.002 | 0.002 |
| 6-Methyl-5-hepten-2-one* (17)        | 15.6713     | 1.7664    | 1067179 | 975682  | 982356  | 1022287 | 0.105            | 0.098 | 0.100 | 0.103 |
| (1347)                               | 15.7046     | 3.5607    | 57592   | 60577   | 16913   | 14639   | 0.006            | 0.006 | 0.002 | 0.001 |
| (1393)                               | 15.7213     | 0.1963    | 25378   | 24354   | 18308   | 16200   | 0.003            | 0.002 | 0.002 | 0.002 |
| (1410)                               | 15.8046     | 2.7570    | 15537   | 14352   | 11289   | 11233   | 0.002            | 0.001 | 0.001 | 0.001 |
| 2-Octanone* (118)                    | 15.8213     | 1.7290    | 201446  | 225558  | 633870  | 218621  | 0.020            | 0.023 | 0.065 | 0.022 |
| (1520)                               | 15.8546     | 3.1121    | 12096   | 12024   | 10195   | 10039   | 0.001            | 0.001 | 0.001 | 0.001 |
| (1698)                               | 15.8546     | 0.0748    | 5229    | 5070    | 3421    | 3750    | 0.001            | 0.001 | 0.000 | 0.000 |
| $\beta$ -Mircene* (50)               | 15.8713     | 1.0841    | 424244  | 390757  | 237819  | 258787  | 0.042            | 0.039 | 0.024 | 0.026 |
| (958)                                | 15.8879     | 2.2991    | 30441   | 29487   | 22466   | 23284   | 0.003            | 0.003 | 0.002 | 0.002 |
| 2-Pentylfuran* (12)                  | 15.9213     | 1.2150    | 1892020 | 1932581 | 1297366 | 1356306 | 0.187            | 0.193 | 0.132 | 0.137 |
| 1,2,4-Trimethylbenzene (23)          | 16.0713     | 1.3738    | 228724  | 220643  | 851652  | 740006  | 0.023            | 0.022 | 0.087 | 0.075 |
| (178)                                | 16.0713     | 0.7664    | 103171  | 78163   | 49005   | 73865   | 0.010            | 0.008 | 0.005 | 0.007 |
| (E,Z) 2,4-Heptadienal (175)          | 16.1379     | 2.2523    | 93599   | 62322   | 104573  | 103890  | 0.009            | 0.006 | 0.011 | 0.010 |
| (1695)                               | 16.1379     | 3.0374    | 9163    | 8834    | 8618    | 8681    | 0.001            | 0.001 | 0.001 | 0.001 |
| (1763)                               | 16.1879     | 3.4860    | 7616    | 6036    | 5676    | 5630    | 0.001            | 0.001 | 0.001 | 0.001 |
| (296)                                | 16.2046     | 2.1215    | 24436   | 22703   | 33337   | 36636   | 0.002            | 0.002 | 0.003 | 0.004 |
| Decane, 2,5,9-trimethyl- (197)       | 16.2546     | 0.8972    | 109439  | 89932   | 85740   | 76232   | 0.011            | 0.009 | 0.009 | 0.008 |
| (213)                                | 16.3046     | 1.9439    | 31383   | 32958   | 29194   | 53837   | 0.003            | 0.003 | 0.003 | 0.005 |

| Compound Name                        | RT 1D (min) | RT 2D (s) | Volume |        |        |        | Percent Response |       |       |       |
|--------------------------------------|-------------|-----------|--------|--------|--------|--------|------------------|-------|-------|-------|
|                                      |             |           | HM_1   | HM_2   | LM_1   | LM_2   | HM_1             | HM_2  | LM_1  | LM_2  |
| (Z)-2,6-Dimethyl-2,6-octadiene (217) | 16.3379     | 1.0000    | 84107  | 99264  | 88918  | 63889  | 0.008            | 0.010 | 0.009 | 0.006 |
| (1470)                               | 16.3546     | 3.8972    | 5549   | 5510   | 3790   | 4909   | 0.001            | 0.001 | 0.000 | 0.000 |
| (638)                                | 16.3713     | 0.7850    | 29227  | 24002  | 54208  | 21239  | 0.003            | 0.002 | 0.006 | 0.002 |
| trans-2-(2-Pentenyl)furan (59)       | 16.3713     | 1.2804    | 307493 | 292089 | 198512 | 248767 | 0.030            | 0.029 | 0.020 | 0.025 |
| Octanal* (139)                       | 16.4046     | 1.6729    | 130038 | 117494 | 117092 | 113393 | 0.013            | 0.012 | 0.012 | 0.011 |
| 2-(2-Ethoxyethoxy)-ethanol (124)     | 16.4213     | 2.2150    | 151016 | 160974 | 139890 | 183490 | 0.015            | 0.016 | 0.014 | 0.018 |
| (207)                                | 16.4879     | 1.9626    | 63785  | 50077  | 63974  | 76272  | 0.006            | 0.005 | 0.007 | 0.008 |
| (1175)                               | 16.4879     | 3.1028    | 14729  | 14033  | 9941   | 12601  | 0.001            | 0.001 | 0.001 | 0.001 |
| (1406)                               | 16.5213     | 3.4393    | 35067  | 40285  | 18431  | 21313  | 0.003            | 0.004 | 0.002 | 0.002 |
| $\alpha$ -Phellandrene* (190)        | 16.5546     | 1.1589    | 128525 | 130201 | 206649 | 98420  | 0.013            | 0.013 | 0.021 | 0.010 |
| (752)                                | 16.5546     | 0.7196    | 28378  | 25490  | 25702  | 21264  | 0.003            | 0.003 | 0.003 | 0.002 |
| (985)                                | 16.6879     | 2.6542    | 24224  | 19956  | 15238  | 19153  | 0.002            | 0.002 | 0.002 | 0.002 |
| cis-Dehydroxy-linalool oxide (149)   | 16.7379     | 1.3271    | 164484 | 213158 | 79988  | 88765  | 0.016            | 0.021 | 0.008 | 0.009 |
| (906)                                | 16.7879     | 0.7009    | 14486  | 13234  | 13578  | 11586  | 0.001            | 0.001 | 0.001 | 0.001 |
| (E,E) 2,4-Heptadienal* (82)          | 16.8046     | 2.2991    | 378385 | 280209 | 347488 | 352152 | 0.037            | 0.028 | 0.035 | 0.035 |
| (998)                                | 16.8213     | 1.6822    | 8988   | 7670   | 7395   | 8081   | 0.001            | 0.001 | 0.001 | 0.001 |
| $\delta$ -3-Carene (291)             | 16.8546     | 1.0841    | 43066  | 40905  | 66745  | 44481  | 0.004            | 0.004 | 0.007 | 0.004 |
| (765)                                | 16.8879     | 0.9346    | 19241  | 18951  | 14872  | 16997  | 0.002            | 0.002 | 0.002 | 0.002 |
| (1562)                               | 16.9213     | 3.5794    | 6873   | 6881   | 5332   | 5961   | 0.001            | 0.001 | 0.001 | 0.001 |
| (1337)                               | 16.9379     | 3.0093    | 10597  | 10999  | 10548  | 10636  | 0.001            | 0.001 | 0.001 | 0.001 |
| 488 (83)                             | 16.9546     | 2.0467    | 173224 | 156594 | 182858 | 229297 | 0.017            | 0.016 | 0.019 | 0.023 |
| (784)                                | 16.9546     | 0.6822    | 19105  | 18719  | 18138  | 16572  | 0.002            | 0.002 | 0.002 | 0.002 |
| (1248)                               | 16.9546     | 2.8131    | 7773   | 7222   | 7058   | 7716   | 0.001            | 0.001 | 0.001 | 0.001 |
| (1559)                               | 16.9546     | 3.2056    | 10093  | 9067   | 7899   | 9310   | 0.001            | 0.001 | 0.001 | 0.001 |
| 3-Hexenol acetate* (648)             | 16.9713     | 1.4393    | 36274  | 36654  | 25262  | 25336  | 0.004            | 0.004 | 0.003 | 0.003 |
| (1525)                               | 16.9879     | 3.7196    | 8126   | 8084   | 7028   | 7300   | 0.001            | 0.001 | 0.001 | 0.001 |
| (1564)                               | 17.0046     | 3.4206    | 9060   | 8249   | 8449   | 8442   | 0.001            | 0.001 | 0.001 | 0.001 |
| (793)                                | 17.0379     | 1.5888    | 18324  | 15458  | 18383  | 16344  | 0.002            | 0.002 | 0.002 | 0.002 |
| (781)                                | 17.0713     | 1.7196    | 22415  | 20825  | 13278  | 15158  | 0.002            | 0.002 | 0.001 | 0.002 |
| (1766)                               | 17.1713     | 2.9907    | 5398   | 4978   | 5329   | 5005   | 0.001            | 0.000 | 0.001 | 0.001 |
| $\alpha$ -Terpinene* (80)            | 17.2046     | 1.1589    | 218598 | 216328 | 168780 | 165647 | 0.022            | 0.022 | 0.017 | 0.017 |
| (763)                                | 17.2213     | 2.3738    | 9913   | 9108   | 11128  | 11313  | 0.001            | 0.001 | 0.001 | 0.001 |
| (886)                                | 17.2546     | 0.6729    | 27228  | 26820  | 27690  | 24147  | 0.003            | 0.003 | 0.003 | 0.002 |
| (1048)                               | 17.3046     | 3.2523    | 22040  | 22702  | 15888  | 21634  | 0.002            | 0.002 | 0.002 | 0.002 |
| 102 (673)                            | 17.3713     | 2.6636    | 36512  | 30499  | 20006  | 26880  | 0.004            | 0.003 | 0.002 | 0.003 |
| (466)                                | 17.4046     | 0.8879    | 44662  | 40818  | 32625  | 35791  | 0.004            | 0.004 | 0.003 | 0.004 |
| (1073)                               | 17.5379     | 2.5514    | 18048  | 16558  | 30465  | 17136  | 0.002            | 0.002 | 0.003 | 0.002 |
| p-Cymene* (38)                       | 17.5713     | 1.3271    | 384262 | 350859 | 111218 | 441196 | 0.038            | 0.035 | 0.011 | 0.044 |
| 2-Ethylhexanol* (54)                 | 17.6046     | 1.8692    | 376824 | 320868 | 230528 | 338333 | 0.037            | 0.032 | 0.023 | 0.034 |
| (558)                                | 17.6879     | 0.9252    | 29555  | 24054  | 25725  | 23908  | 0.003            | 0.002 | 0.003 | 0.002 |
| (1454)                               | 17.7379     | 2.8411    | 25756  | 10184  | 8762   | 9511   | 0.003            | 0.001 | 0.001 | 0.001 |

| Compound Name                             | RT 1D (min) | RT 2D (s) | Volume  |         |         |         | Percent Response |       |       |       |
|-------------------------------------------|-------------|-----------|---------|---------|---------|---------|------------------|-------|-------|-------|
|                                           |             |           | HM_1    | HM_2    | LM_1    | LM_2    | HM_1             | HM_2  | LM_1  | LM_2  |
| (556)                                     | 17.7546     | 1.8318    | 29731   | 26964   | 131581  | 24429   | 0.003            | 0.003 | 0.013 | 0.002 |
| (1098)                                    | 17.7546     | 2.4299    | 9531    | 10322   | 15788   | 10889   | 0.001            | 0.001 | 0.002 | 0.001 |
| (657)                                     | 17.7713     | 2.1682    | 14251   | 14147   | 10834   | 13068   | 0.001            | 0.001 | 0.001 | 0.001 |
| Limonene* (7)                             | 17.7879     | 1.1308    | 3102886 | 2866352 | 3345589 | 2956642 | 0.306            | 0.287 | 0.341 | 0.298 |
| (1567)                                    | 17.8713     | 3.7103    | 11428   | 11120   | 6978    | 8361    | 0.001            | 0.001 | 0.001 | 0.001 |
| (434)                                     | 17.8879     | 2.0000    | 14854   | 22719   | 25000   | 26692   | 0.001            | 0.002 | 0.003 | 0.003 |
| (1428)                                    | 17.9213     | 3.4299    | 11045   | 12552   | 5612    | 6824    | 0.001            | 0.001 | 0.001 | 0.001 |
| Benzyl alcohol* (158)                     | 17.9379     | 2.9252    | 438691  | 561153  | 125611  | 132972  | 0.043            | 0.056 | 0.013 | 0.013 |
| Eucalyptol* (237)                         | 17.9879     | 1.3084    | 15237   | 15608   | 53638   | 29447   | 0.002            | 0.002 | 0.005 | 0.003 |
| (394)                                     | 18.0046     | 0.9533    | 39131   | 34188   | 27517   | 26808   | 0.004            | 0.003 | 0.003 | 0.003 |
| Cyclohexanone, 2,2,6-trimethyl* (25)      | 18.0713     | 1.7664    | 420973  | 379533  | 754256  | 713721  | 0.042            | 0.038 | 0.077 | 0.072 |
| (Z)- $\beta$ -Ocimene (87)                | 18.1046     | 1.1308    | 263498  | 272124  | 218753  | 149828  | 0.026            | 0.027 | 0.022 | 0.015 |
| (1281)                                    | 18.1213     | 3.5234    | 9858    | 11387   | 7055    | 9527    | 0.001            | 0.001 | 0.001 | 0.001 |
| (953)                                     | 18.1213     | 2.4112    | 26333   | 23723   | 24052   | 21686   | 0.003            | 0.002 | 0.002 | 0.002 |
| 5-Ethyl-2(5H)-furanone (502)              | 18.1379     | 3.8131    | 36684   | 34242   | 23588   | 25586   | 0.004            | 0.003 | 0.002 | 0.003 |
| 3-Octen-2-one* (94)                       | 18.1546     | 2.0467    | 238580  | 231779  | 212404  | 202933  | 0.024            | 0.023 | 0.022 | 0.020 |
| Indane (375)                              | 18.1713     | 1.5047    | 29101   | 26297   | 30738   | 28795   | 0.003            | 0.003 | 0.003 | 0.003 |
| 1,2,3-Trimethylbenzene (669)              | 18.2046     | 1.3364    | 16361   | 17256   | 17327   | 14613   | 0.002            | 0.002 | 0.002 | 0.001 |
| (1188)                                    | 18.2546     | 0.0654    | 22443   | 19422   | 15738   | 17003   | 0.002            | 0.002 | 0.002 | 0.002 |
| (974)                                     | 18.3046     | 1.7290    | 11259   | 9747    | 46611   | 11707   | 0.001            | 0.001 | 0.005 | 0.001 |
| (1078)                                    | 18.3046     | 1.0748    | 11301   | 13403   | 13147   | 11173   | 0.001            | 0.001 | 0.001 | 0.001 |
| (1131)                                    | 18.3379     | 3.4206    | 21494   | 21396   | 16157   | 17937   | 0.002            | 0.002 | 0.002 | 0.002 |
| (932)                                     | 18.4379     | 2.7664    | 36290   | 34750   | 26220   | 27451   | 0.004            | 0.003 | 0.003 | 0.003 |
| (1102)                                    | 18.4713     | 1.0187    | 15912   | 15603   | 11907   | 11834   | 0.002            | 0.002 | 0.001 | 0.001 |
| Phenyl acetaldehyde* (72)                 | 18.4879     | 2.3738    | 307476  | 275271  | 265682  | 282633  | 0.030            | 0.028 | 0.027 | 0.028 |
| (1537)                                    | 18.4879     | 3.7944    | 6171    | 5874    | 5118    | 5994    | 0.001            | 0.001 | 0.001 | 0.001 |
| (1489)                                    | 18.5213     | 3.6168    | 7019    | 6237    | 5459    | 6053    | 0.001            | 0.001 | 0.001 | 0.001 |
| (719)                                     | 18.5379     | 2.0187    | 34115   | 35808   | 34402   | 30811   | 0.003            | 0.004 | 0.004 | 0.003 |
| (1597)                                    | 18.5546     | 0.1589    | 12210   | 11863   | 10248   | 10870   | 0.001            | 0.001 | 0.001 | 0.001 |
| Indene (568)                              | 18.5879     | 1.7383    | 24911   | 24354   | 14084   | 18217   | 0.002            | 0.002 | 0.001 | 0.002 |
| (E)- $\beta$ -Ocimene* (57)               | 18.6213     | 1.1589    | 1003048 | 1195485 | 266490  | 298959  | 0.099            | 0.120 | 0.027 | 0.030 |
| Isobutyl angelate (192)                   | 18.7713     | 1.4206    | 63374   | 63876   | 88498   | 79503   | 0.006            | 0.006 | 0.009 | 0.008 |
| (646)                                     | 18.7713     | 1.0841    | 606     | 536     | 15759   | 506     | 0.000            | 0.000 | 0.002 | 0.000 |
| 1-Ethyl-1H-pyrrole-2-carboxyaldehyde (53) | 18.7879     | 2.3084    | 626057  | 502516  | 382024  | 309029  | 0.062            | 0.050 | 0.039 | 0.031 |
| (946)                                     | 18.8046     | 3.7664    | 19305   | 17472   | 9447    | 16618   | 0.002            | 0.002 | 0.001 | 0.002 |
| (1476)                                    | 18.8046     | 2.9907    | 10576   | 10014   | 8890    | 8081    | 0.001            | 0.001 | 0.001 | 0.001 |
| (544)                                     | 18.8713     | 1.9252    | 36080   | 31276   | 37645   | 33810   | 0.004            | 0.003 | 0.004 | 0.003 |
| (490)                                     | 18.8879     | 0.9907    | 63770   | 57929   | 43489   | 39294   | 0.006            | 0.006 | 0.004 | 0.004 |
| (666)                                     | 18.8879     | 1.7383    | 24516   | 23720   | 26012   | 21167   | 0.002            | 0.002 | 0.003 | 0.002 |
| (892)                                     | 18.9546     | 3.7196    | 50188   | 46069   | 22641   | 19338   | 0.005            | 0.005 | 0.002 | 0.002 |
| (518)                                     | 19.0713     | 0.9346    | 31431   | 28918   | 27871   | 26759   | 0.003            | 0.003 | 0.003 | 0.003 |

| Compound Name                        | RT 1D (min) | RT 2D (s) | Volume  |         |         |         | Percent Response |       |       |       |
|--------------------------------------|-------------|-----------|---------|---------|---------|---------|------------------|-------|-------|-------|
|                                      |             |           | HM_1    | HM_2    | LM_1    | LM_2    | HM_1             | HM_2  | LM_1  | LM_2  |
| (E)-2-Octenal* (170)                 | 19.1046     | 2.0841    | 114833  | 98861   | 98528   | 106383  | 0.011            | 0.010 | 0.010 | 0.011 |
| (1637)                               | 19.1213     | 2.7850    | 7097    | 6821    | 5683    | 6403    | 0.001            | 0.001 | 0.001 | 0.001 |
| (177)                                | 19.1879     | 1.3925    | 32959   | 29888   | 31641   | 41314   | 0.003            | 0.003 | 0.003 | 0.004 |
| 2-Methylbenzenemethanol* (1139)      | 19.2046     | 2.5421    | 31953   | 34549   | 19337   | 21975   | 0.003            | 0.003 | 0.002 | 0.002 |
| (1517)                               | 19.2046     | 3.2617    | 16337   | 16381   | 13115   | 13921   | 0.002            | 0.002 | 0.001 | 0.001 |
| $\gamma$ -Terpinene* (30)            | 19.2379     | 1.1869    | 465637  | 411232  | 550274  | 532618  | 0.046            | 0.041 | 0.056 | 0.054 |
| 17 (97)                              | 19.3046     | 1.8224    | 125227  | 117873  | 194430  | 153837  | 0.012            | 0.012 | 0.020 | 0.016 |
| (326)                                | 19.3379     | 0.9907    | 61739   | 50361   | 39988   | 37104   | 0.006            | 0.005 | 0.004 | 0.004 |
| (416)                                | 19.4713     | 0.9813    | 29407   | 28907   | 34668   | 23861   | 0.003            | 0.003 | 0.004 | 0.002 |
| (500)                                | 19.4713     | 1.4953    | 18845   | 17205   | 20237   | 24892   | 0.002            | 0.002 | 0.002 | 0.003 |
| (E)-2-Octenol (10)                   | 19.5046     | 2.0374    | 1019337 | 916165  | 1188894 | 1419509 | 0.101            | 0.092 | 0.121 | 0.143 |
| (607)                                | 19.5213     | 2.7944    | 13876   | 12680   | 8336    | 13605   | 0.001            | 0.001 | 0.001 | 0.001 |
| (926)                                | 19.5546     | 3.4953    | 11490   | 11288   | 6769    | 9385    | 0.001            | 0.001 | 0.001 | 0.001 |
| (1108)                               | 19.5546     | 3.8505    | 9176    | 8662    | 6339    | 8869    | 0.001            | 0.001 | 0.001 | 0.001 |
| (1361)                               | 19.5713     | 0.7290    | 5883    | 5966    | 5268    | 6700    | 0.001            | 0.001 | 0.001 | 0.001 |
| (1170)                               | 19.6046     | 0.0654    | 11232   | 9013    | 6857    | 9551    | 0.001            | 0.001 | 0.001 | 0.001 |
| 1-Octanol* (37)                      | 19.6046     | 1.9346    | 550372  | 704725  | 907470  | 696394  | 0.054            | 0.071 | 0.092 | 0.070 |
| Heptanoic acid* (351)                | 19.6046     | 3.1869    | 172014  | 159131  | 75068   | 99719   | 0.017            | 0.016 | 0.008 | 0.010 |
| (1154)                               | 19.6213     | 0.3925    | 16705   | 14939   | 12805   | 16079   | 0.002            | 0.001 | 0.001 | 0.002 |
| (370)                                | 19.6546     | 0.9439    | 49160   | 41818   | 38687   | 34717   | 0.005            | 0.004 | 0.004 | 0.003 |
| (747)                                | 19.6546     | 1.4486    | 23880   | 23472   | 26331   | 22978   | 0.002            | 0.002 | 0.003 | 0.002 |
| 491 (21)                             | 19.7046     | 2.1589    | 1399944 | 1415399 | 1485087 | 1515406 | 0.138            | 0.142 | 0.151 | 0.153 |
| (233)                                | 19.7213     | 3.4953    | 278196  | 114924  | 122281  | 102571  | 0.027            | 0.012 | 0.012 | 0.010 |
| (448)                                | 19.8213     | 1.8692    | 47926   | 83979   | 63590   | 31229   | 0.005            | 0.008 | 0.006 | 0.003 |
| Acetophenone (879)                   | 19.8713     | 2.5981    | 26066   | 30385   | 20969   | 20542   | 0.003            | 0.003 | 0.002 | 0.002 |
| (514)                                | 19.8713     | 0.0654    | 79083   | 73963   | 61353   | 68447   | 0.008            | 0.007 | 0.006 | 0.007 |
| cis-Linalool oxide (furanoid)* (198) | 19.9046     | 1.6729    | 1506253 | 1609721 | 78980   | 68554   | 0.149            | 0.161 | 0.008 | 0.007 |
| (428)                                | 19.9713     | 1.2897    | 24578   | 21472   | 21394   | 27039   | 0.002            | 0.002 | 0.002 | 0.003 |
| (1345)                               | 20.0046     | 2.8785    | 20002   | 22146   | 17931   | 17762   | 0.002            | 0.002 | 0.002 | 0.002 |
| (1726)                               | 20.0213     | 3.5981    | 5912    | 6353    | 5020    | 5117    | 0.001            | 0.001 | 0.001 | 0.001 |
| (1421)                               | 20.0546     | 3.3738    | 9648    | 10240   | 9018    | 9713    | 0.001            | 0.001 | 0.001 | 0.001 |
| (1664)                               | 20.0713     | 3.2336    | 7469    | 6319    | 5386    | 5888    | 0.001            | 0.001 | 0.001 | 0.001 |
| 494 (96)                             | 20.0879     | 1.0374    | 292271  | 263967  | 165890  | 238350  | 0.029            | 0.026 | 0.017 | 0.024 |
| (808)                                | 20.0879     | 1.6075    | 18347   | 18604   | 12591   | 11282   | 0.002            | 0.002 | 0.001 | 0.001 |
| (1047)                               | 20.0879     | 0.0374    | 10868   | 9117    | 9047    | 8619    | 0.001            | 0.001 | 0.001 | 0.001 |
| 490 (303)                            | 20.2213     | 0.9907    | 97893   | 83813   | 127596  | 55919   | 0.010            | 0.008 | 0.013 | 0.006 |
| (532)                                | 20.2213     | 1.4206    | 17711   | 19290   | 18258   | 17360   | 0.002            | 0.002 | 0.002 | 0.002 |
| (815)                                | 20.2379     | 1.8411    | 20613   | 18973   | 21976   | 19518   | 0.002            | 0.002 | 0.002 | 0.002 |
| (1600)                               | 20.2546     | 2.9439    | 11549   | 10904   | 9262    | 10896   | 0.001            | 0.001 | 0.001 | 0.001 |
| (1723)                               | 20.2713     | 0.3925    | 5704    | 5827    | 4916    | 5706    | 0.001            | 0.001 | 0.001 | 0.001 |
| 123 (460)                            | 20.2879     | 2.0467    | 47780   | 45233   | 61956   | 47519   | 0.005            | 0.005 | 0.006 | 0.005 |

| Compound Name                          | RT 1D (min) | RT 2D (s) | Volume   |          |        |         | Percent Response |       |       |       |
|----------------------------------------|-------------|-----------|----------|----------|--------|---------|------------------|-------|-------|-------|
|                                        |             |           | HM_1     | HM_2     | LM_1   | LM_2    | HM_1             | HM_2  | LM_1  | LM_2  |
| (1326)                                 | 20.2879     | 3.8505    | 10497    | 10711    | 10526  | 9328    | 0.001            | 0.001 | 0.001 | 0.001 |
| (288)                                  | 20.3213     | 1.2336    | 32167    | 27218    | 35889  | 36100   | 0.003            | 0.003 | 0.004 | 0.004 |
| (670)                                  | 20.4546     | 1.8785    | 31833    | 28301    | 19494  | 20669   | 0.003            | 0.003 | 0.002 | 0.002 |
| (436)                                  | 20.5213     | 1.4393    | 31579    | 24100    | 19263  | 24637   | 0.003            | 0.002 | 0.002 | 0.002 |
| o-Methoxyphenol (783)                  | 20.5213     | 2.4393    | 20314    | 18231    | 12329  | 15576   | 0.002            | 0.002 | 0.001 | 0.002 |
| (791)                                  | 20.5379     | 2.1402    | 62579    | 81677    | 19311  | 19266   | 0.006            | 0.008 | 0.002 | 0.002 |
| (1301)                                 | 20.5379     | 3.8411    | 9093     | 10069    | 7270   | 8573    | 0.001            | 0.001 | 0.001 | 0.001 |
| (1370)                                 | 20.6046     | 3.6262    | 14093    | 14405    | 10321  | 10023   | 0.001            | 0.001 | 0.001 | 0.001 |
| 3,3,5-Trimethyl-1,4-hexadiene (241)    | 20.6213     | 1.0000    | 215605   | 185184   | 112731 | 115267  | 0.021            | 0.019 | 0.011 | 0.012 |
| (1544)                                 | 20.6546     | 2.8785    | 19039    | 19023    | 6388   | 6910    | 0.002            | 0.002 | 0.001 | 0.001 |
| trans-Linalool oxide (furanoid)* (129) | 20.6879     | 1.7664    | 4024784  | 4856390  | 136225 | 167253  | 0.397            | 0.486 | 0.014 | 0.017 |
| Terpinolene (49)                       | 20.7046     | 1.1869    | 407970   | 399949   | 288568 | 273432  | 0.040            | 0.040 | 0.029 | 0.028 |
| p-Cymenene (218)                       | 20.7046     | 1.5421    | 711059   | 114239   | 67620  | 74641   | 0.070            | 0.011 | 0.007 | 0.008 |
| (Z,E)-3,5-octadien-2-one* (191)        | 20.8379     | 2.2991    | 216803   | 243525   | 117105 | 121576  | 0.021            | 0.024 | 0.012 | 0.012 |
| (273)                                  | 20.8546     | 0.9813    | 109761   | 81401    | 57297  | 47983   | 0.011            | 0.008 | 0.006 | 0.005 |
| 2-Nonanone* (420)                      | 21.0213     | 1.3551    | 64281    | 66237    | 54970  | 49572   | 0.006            | 0.007 | 0.006 | 0.005 |
| 4,7-Dimethylundecane (86)              | 21.0879     | 0.9626    | 382889   | 316165   | 150265 | 196269  | 0.038            | 0.032 | 0.015 | 0.020 |
| Linalool* (15)                         | 21.1213     | 1.8037    | 11207481 | 11982831 | 945937 | 1109491 | 1.106            | 1.200 | 0.096 | 0.112 |
| (462)                                  | 21.1213     | 2.2056    | 145110   | 172144   | 31623  | 31678   | 0.014            | 0.017 | 0.003 | 0.003 |
| (778)                                  | 21.1213     | 2.4766    | 85197    | 99545    | 18759  | 20221   | 0.008            | 0.010 | 0.002 | 0.002 |
| (1340)                                 | 21.1213     | 2.8879    | 32432    | 35528    | 10251  | 10612   | 0.003            | 0.004 | 0.001 | 0.001 |
| (1654)                                 | 21.1213     | 3.2523    | 26118    | 29155    | 10449  | 10227   | 0.003            | 0.003 | 0.001 | 0.001 |
| (1740)                                 | 21.2046     | 0.3925    | 9432     | 10150    | 6485   | 6305    | 0.001            | 0.001 | 0.001 | 0.001 |
| (1703)                                 | 21.2046     | 0.0748    | 7239     | 6922     | 4129   | 3815    | 0.001            | 0.001 | 0.000 | 0.000 |
| (267)                                  | 21.2546     | 0.9813    | 144592   | 124380   | 105087 | 70512   | 0.014            | 0.012 | 0.011 | 0.007 |
| (649)                                  | 21.2713     | 1.4112    | 23660    | 22760    | 18446  | 18402   | 0.002            | 0.002 | 0.002 | 0.002 |
| Nonanal* (48)                          | 21.3213     | 1.7477    | 656435   | 657406   | 672197 | 331507  | 0.065            | 0.066 | 0.068 | 0.033 |
| Hotrienol* (28)                        | 21.3713     | 1.9439    | 1618234  | 1838281  | 456214 | 579394  | 0.160            | 0.184 | 0.046 | 0.058 |
| (1292)                                 | 21.3713     | 3.0280    | 12771    | 12957    | 8524   | 8552    | 0.001            | 0.001 | 0.001 | 0.001 |
| (1325)                                 | 21.3713     | 3.3738    | 18429    | 19334    | 14469  | 14866   | 0.002            | 0.002 | 0.001 | 0.001 |
| (1502)                                 | 21.3713     | 3.1963    | 9753     | 11360    | 7050   | 7422    | 0.001            | 0.001 | 0.001 | 0.001 |
| 6-Methyl-3,5-heptadien-2-one* (159)    | 21.3879     | 2.3738    | 150378   | 152871   | 92285  | 114821  | 0.015            | 0.015 | 0.009 | 0.012 |
| (868)                                  | 21.3879     | 2.7664    | 21143    | 21854    | 13012  | 15426   | 0.002            | 0.002 | 0.001 | 0.002 |
| (318)                                  | 21.4546     | 1.0000    | 103598   | 88677    | 65535  | 59275   | 0.010            | 0.009 | 0.007 | 0.006 |
| 1,3,8-p-Menthatriene (206)             | 21.5046     | 1.5327    | 80178    | 66451    | 77103  | 61991   | 0.008            | 0.007 | 0.008 | 0.006 |
| (1046)                                 | 21.5046     | 3.8131    | 18880    | 16379    | 12313  | 11905   | 0.002            | 0.002 | 0.001 | 0.001 |
| $\alpha$ -Thujone* (20)                | 21.5879     | 1.9533    | 766652   | 647171   | 885511 | 758843  | 0.076            | 0.065 | 0.090 | 0.076 |
| (563)                                  | 21.6713     | 2.8037    | 22240    | 19070    | 14561  | 21381   | 0.002            | 0.002 | 0.001 | 0.002 |
| (1377)                                 | 21.6713     | 3.2523    | 12640    | 10704    | 8476   | 9796    | 0.001            | 0.001 | 0.001 | 0.001 |
| 105 (106)                              | 21.7046     | 2.1963    | 164594   | 151113   | 140201 | 177359  | 0.016            | 0.015 | 0.014 | 0.018 |
| (160)                                  | 21.7213     | 0.9720    | 338390   | 246023   | 111866 | 128925  | 0.033            | 0.025 | 0.011 | 0.013 |

| Compound Name                      | RT 1D (min) | RT 2D (s) | Volume |        |        |        | Percent Response |       |       |       |
|------------------------------------|-------------|-----------|--------|--------|--------|--------|------------------|-------|-------|-------|
|                                    |             |           | HM_1   | HM_2   | LM_1   | LM_2   | HM_1             | HM_2  | LM_1  | LM_2  |
| (1335)                             | 21.7879     | 3.7570    | 27020  | 22903  | 13403  | 13291  | 0.003            | 0.002 | 0.001 | 0.001 |
| 495 (520)                          | 21.8546     | 1.6168    | 63221  | 62760  | 36246  | 35653  | 0.006            | 0.006 | 0.004 | 0.004 |
| 2-Phenylethanol* (270)             | 21.8546     | 2.7664    | 669653 | 321651 | 35619  | 47832  | 0.066            | 0.032 | 0.004 | 0.005 |
| (1399)                             | 21.8546     | 3.1589    | 20765  | 18885  | 8198   | 8125   | 0.002            | 0.002 | 0.001 | 0.001 |
| (1561)                             | 21.8546     | 3.3178    | 13553  | 13967  | 5956   | 5535   | 0.001            | 0.001 | 0.001 | 0.001 |
| (E,E)-Octadienal* (333)            | 21.8713     | 2.6916    | 279585 | 609303 | 65168  | 42345  | 0.028            | 0.061 | 0.007 | 0.004 |
| 114 (545)                          | 21.8879     | 2.1869    | 42700  | 48201  | 31760  | 31340  | 0.004            | 0.005 | 0.003 | 0.003 |
| 497 (128)                          | 21.9213     | 0.9813    | 422062 | 358035 | 183914 | 169721 | 0.042            | 0.036 | 0.019 | 0.017 |
| 498 (145)                          | 21.9379     | 1.2430    | 257744 | 277920 | 110061 | 97292  | 0.025            | 0.028 | 0.011 | 0.010 |
| (1760)                             | 22.0213     | 0.1402    | 8883   | 8918   | 6743   | 6907   | 0.001            | 0.001 | 0.001 | 0.001 |
| (552)                              | 22.0546     | 1.4953    | 26114  | 28206  | 20787  | 21773  | 0.003            | 0.003 | 0.002 | 0.002 |
| (243)                              | 22.0879     | 1.0000    | 92808  | 85618  | 58062  | 48644  | 0.009            | 0.009 | 0.006 | 0.005 |
| $\beta$ -Thujone* (117)            | 22.1046     | 1.9720    | 121693 | 104720 | 128588 | 116744 | 0.012            | 0.010 | 0.013 | 0.012 |
| (1431)                             | 22.1046     | 2.9252    | 9183   | 10176  | 6664   | 8219   | 0.001            | 0.001 | 0.001 | 0.001 |
| (229)                              | 22.1713     | 1.8318    | 38436  | 38404  | 52722  | 42177  | 0.004            | 0.004 | 0.005 | 0.004 |
| 2-Ethyl-m-xylene (405)             | 22.2546     | 1.4953    | 63584  | 62984  | 49840  | 43867  | 0.006            | 0.006 | 0.005 | 0.004 |
| (1234)                             | 22.2713     | 2.6636    | 13200  | 12332  | 9638   | 9605   | 0.001            | 0.001 | 0.001 | 0.001 |
| (608)                              | 22.3213     | 1.8505    | 18470  | 19993  | 13140  | 15624  | 0.002            | 0.002 | 0.001 | 0.002 |
| (671)                              | 22.4546     | 1.6355    | 30127  | 28993  | 19245  | 17816  | 0.003            | 0.003 | 0.002 | 0.002 |
| (1349)                             | 22.4546     | 2.5794    | 13814  | 14651  | 10938  | 10149  | 0.001            | 0.001 | 0.001 | 0.001 |
| 500 (134)                          | 22.4546     | 1.0000    | 460733 | 376108 | 178015 | 173144 | 0.045            | 0.038 | 0.018 | 0.017 |
| allo-Ocimene (366)                 | 22.6046     | 1.3645    | 83017  | 62999  | 33267  | 35426  | 0.008            | 0.006 | 0.003 | 0.004 |
| 501 (381)                          | 22.6879     | 1.4766    | 58403  | 94385  | 38313  | 35174  | 0.006            | 0.009 | 0.004 | 0.004 |
| (531)                              | 22.7046     | 1.8879    | 43952  | 46827  | 26330  | 27143  | 0.004            | 0.005 | 0.003 | 0.003 |
| 502 (219)                          | 22.7213     | 1.0000    | 260088 | 172542 | 81682  | 73901  | 0.026            | 0.017 | 0.008 | 0.007 |
| (978)                              | 22.7713     | 2.1028    | 10634  | 10311  | 8833   | 9012   | 0.001            | 0.001 | 0.001 | 0.001 |
| 1-Ethyl-2,5-pyrrolidinedione (456) | 22.8546     | 3.5140    | 71661  | 70898  | 33809  | 33054  | 0.007            | 0.007 | 0.003 | 0.003 |
| 503 (242)                          | 22.8713     | 0.9907    | 171595 | 148161 | 67660  | 65924  | 0.017            | 0.015 | 0.007 | 0.007 |
| (1436)                             | 22.8713     | 1.7009    | 10878  | 11660  | 10085  | 8981   | 0.001            | 0.001 | 0.001 | 0.001 |
| 504 (257)                          | 23.0213     | 1.0093    | 141101 | 126017 | 66963  | 53434  | 0.014            | 0.013 | 0.007 | 0.005 |
| (1026)                             | 23.0213     | 1.4206    | 11688  | 12232  | 6415   | 8727   | 0.001            | 0.001 | 0.001 | 0.001 |
| 3-Nonen-2-one (482)                | 23.0546     | 2.0841    | 79890  | 76411  | 54512  | 56257  | 0.008            | 0.008 | 0.006 | 0.006 |
| Benzyl nitrile* (585)              | 23.1379     | 3.3271    | 764360 | 784509 | 54572  | 49342  | 0.075            | 0.079 | 0.006 | 0.005 |
| (1315)                             | 23.1713     | 2.3925    | 8471   | 7886   | 7341   | 7370   | 0.001            | 0.001 | 0.001 | 0.001 |
| (606)                              | 23.2046     | 1.5607    | 23864  | 25918  | 18155  | 19045  | 0.002            | 0.003 | 0.002 | 0.002 |
| (922)                              | 23.2046     | 1.3925    | 24931  | 24847  | 12250  | 11242  | 0.002            | 0.002 | 0.001 | 0.001 |
| 5-Propyldecane (572)               | 23.2546     | 0.9813    | 43749  | 32046  | 13742  | 14907  | 0.004            | 0.003 | 0.001 | 0.002 |
| 505 (467)                          | 23.3379     | 1.0280    | 69654  | 57953  | 23689  | 27780  | 0.007            | 0.006 | 0.002 | 0.003 |
| (933)                              | 23.3546     | 2.6449    | 23264  | 22272  | 16419  | 20357  | 0.002            | 0.002 | 0.002 | 0.002 |
| (1314)                             | 23.3546     | 3.1682    | 45088  | 58965  | 25979  | 17260  | 0.004            | 0.006 | 0.003 | 0.002 |
| (1640)                             | 23.4046     | 2.4860    | 6123   | 7040   | 5773   | 5484   | 0.001            | 0.001 | 0.001 | 0.001 |

| Compound Name                                | RT 1D (min) | RT 2D (s) | Volume  |         |        |        | Percent Response |       |       |       |
|----------------------------------------------|-------------|-----------|---------|---------|--------|--------|------------------|-------|-------|-------|
|                                              |             |           | HM_1    | HM_2    | LM_1   | LM_2   | HM_1             | HM_2  | LM_1  | LM_2  |
| (R,S)-5-Ethyl-6-methyl-3E-hepten-2-one (260) | 23.4213     | 2.0374    | 84511   | 89901   | 43705  | 47657  | 0.008            | 0.009 | 0.004 | 0.005 |
| (95)                                         | 23.5546     | 1.5047    | 178899  | 165560  | 128372 | 142140 | 0.018            | 0.017 | 0.013 | 0.014 |
| (655)                                        | 23.5713     | 2.1589    | 17584   | 14583   | 13578  | 16383  | 0.002            | 0.001 | 0.001 | 0.002 |
| (1363)                                       | 23.6546     | 3.0935    | 20360   | 23921   | 13758  | 12830  | 0.002            | 0.002 | 0.001 | 0.001 |
| 3-Nonen-1-ol* (276)                          | 23.6879     | 1.9346    | 62103   | 57853   | 62576  | 49929  | 0.006            | 0.006 | 0.006 | 0.005 |
| 2-Ethylhexyl acetate (560)                   | 23.7046     | 1.4673    | 18572   | 15871   | 32788  | 15871  | 0.002            | 0.002 | 0.003 | 0.002 |
| (68)                                         | 23.7379     | 0.9252    | 695987  | 559040  | 406432 | 388906 | 0.069            | 0.056 | 0.041 | 0.039 |
| (1157)                                       | 23.7546     | 2.2336    | 19201   | 17048   | 11792  | 14026  | 0.002            | 0.002 | 0.001 | 0.001 |
| 506 (121)                                    | 23.7713     | 1.0280    | 436899  | 321547  | 119240 | 131407 | 0.043            | 0.032 | 0.012 | 0.013 |
| (472)                                        | 23.8213     | 1.5421    | 42290   | 42648   | 31993  | 31446  | 0.004            | 0.004 | 0.003 | 0.003 |
| Menthone* (127)                              | 23.9213     | 2.0093    | 186972  | 162087  | 229747 | 217051 | 0.018            | 0.016 | 0.023 | 0.022 |
| (1233)                                       | 23.9713     | 0.4019    | 20484   | 20879   | 17027  | 19481  | 0.002            | 0.002 | 0.002 | 0.002 |
| 508 (144)                                    | 23.9879     | 0.9813    | 300792  | 239028  | 96965  | 92245  | 0.030            | 0.024 | 0.010 | 0.009 |
| (1619)                                       | 24.0213     | 0.3084    | 6178    | 5487    | 5201   | 5367   | 0.001            | 0.001 | 0.001 | 0.001 |
| (839)                                        | 24.0379     | 1.4579    | 21173   | 18652   | 13477  | 13977  | 0.002            | 0.002 | 0.001 | 0.001 |
| (E)-2-Nonenal* (497)                         | 24.1046     | 2.3178    | 15433   | 15279   | 12687  | 17371  | 0.002            | 0.002 | 0.001 | 0.002 |
| 118 (209)                                    | 24.1379     | 2.5794    | 37991   | 36349   | 95319  | 87910  | 0.004            | 0.004 | 0.010 | 0.009 |
| (1545)                                       | 24.1713     | 0.2430    | 7707    | 7606    | 6367   | 7379   | 0.001            | 0.001 | 0.001 | 0.001 |
| 4-Methylundecane (165)                       | 24.1879     | 0.9907    | 429607  | 315889  | 122713 | 123846 | 0.042            | 0.032 | 0.012 | 0.012 |
| (637)                                        | 24.3046     | 2.1028    | 22969   | 20578   | 8435   | 10444  | 0.002            | 0.002 | 0.001 | 0.001 |
| (440)                                        | 24.3046     | 1.4673    | 24868   | 22700   | 31508  | 32384  | 0.002            | 0.002 | 0.003 | 0.003 |
| Octanoic acid* (81)                          | 24.3379     | 3.0187    | 289921  | 325376  | 114940 | 322191 | 0.029            | 0.033 | 0.012 | 0.032 |
| (779)                                        | 24.3379     | 3.8598    | 24694   | 23334   | 15540  | 24254  | 0.002            | 0.002 | 0.002 | 0.002 |
| (912)                                        | 24.3379     | 3.6822    | 14100   | 13293   | 7820   | 12817  | 0.001            | 0.001 | 0.001 | 0.001 |
| Menthofuran (392)                            | 24.4046     | 1.5421    | 61732   | 50668   | 54709  | 57063  | 0.006            | 0.005 | 0.006 | 0.006 |
| (1009)                                       | 24.4213     | 0.1308    | 26639   | 25430   | 17781  | 24702  | 0.003            | 0.003 | 0.002 | 0.002 |
| (1136)                                       | 24.4213     | 0.4673    | 19490   | 19064   | 14132  | 19708  | 0.002            | 0.002 | 0.001 | 0.002 |
| (714)                                        | 24.4379     | 2.2897    | 22926   | 19473   | 14095  | 15668  | 0.002            | 0.002 | 0.001 | 0.002 |
| Nonanol* (182)                               | 24.5213     | 1.9252    | 141771  | 125925  | 72932  | 102585 | 0.014            | 0.013 | 0.007 | 0.010 |
| (90)                                         | 24.5213     | 1.0000    | 531451  | 422365  | 165191 | 167595 | 0.052            | 0.042 | 0.017 | 0.017 |
| Epoxylinool* (1195)                          | 24.5546     | 2.6355    | 12422   | 11252   | 6452   | 8712   | 0.001            | 0.001 | 0.001 | 0.001 |
| (597)                                        | 24.5879     | 1.5514    | 19104   | 18492   | 15432  | 16482  | 0.002            | 0.002 | 0.002 | 0.002 |
| cis-Linalool oxide (pyranoid) (169)          | 24.6046     | 2.2243    | 269408  | 345214  | 64994  | 75567  | 0.027            | 0.035 | 0.007 | 0.008 |
| Ethyl benzoate* (41)                         | 24.6879     | 1.9720    | 669718  | 621722  | 567128 | 554292 | 0.066            | 0.062 | 0.058 | 0.056 |
| 3-Methylundecane (681)                       | 24.7379     | 1.0280    | 61749   | 48300   | 26715  | 29038  | 0.006            | 0.005 | 0.003 | 0.003 |
| 2,4-Dimethylbenzaldehyde (63)                | 24.7713     | 2.2617    | 1627826 | 1349409 | 72388  | 171285 | 0.161            | 0.135 | 0.007 | 0.017 |
| (848)                                        | 24.7879     | 1.4486    | 38917   | 40497   | 32241  | 33051  | 0.004            | 0.004 | 0.003 | 0.003 |
| (944)                                        | 24.7879     | 2.6168    | 34214   | 33971   | 14642  | 16240  | 0.003            | 0.003 | 0.001 | 0.002 |
| (1208)                                       | 24.7879     | 2.8692    | 24328   | 21790   | 11349  | 12851  | 0.002            | 0.002 | 0.001 | 0.001 |
| (1305)                                       | 24.7879     | 3.1402    | 18949   | 19447   | 11609  | 13066  | 0.002            | 0.002 | 0.001 | 0.001 |
| (1687)                                       | 24.7879     | 3.6636    | 7744    | 8617    | 5016   | 6983   | 0.001            | 0.001 | 0.001 | 0.001 |

| Compound Name                             | RT 1D (min) | RT 2D (s) | Volume  |         |        |        | Percent Response |       |       |       |
|-------------------------------------------|-------------|-----------|---------|---------|--------|--------|------------------|-------|-------|-------|
|                                           |             |           | HM_1    | HM_2    | LM_1   | LM_2   | HM_1             | HM_2  | LM_1  | LM_2  |
| (1588)                                    | 24.7879     | 3.8598    | 8916    | 9218    | 6169   | 7107   | 0.001            | 0.001 | 0.001 | 0.001 |
| (1618)                                    | 24.8213     | 3.5794    | 7254    | 8691    | 5210   | 5643   | 0.001            | 0.001 | 0.001 | 0.001 |
| trans-Linalool oxide (pyranoid)* (1789)   | 24.8379     | 2.2243    | 169589  | 502798  | 221762 | 145663 | 0.017            | 0.050 | 0.023 | 0.015 |
| (634)                                     | 24.8713     | 1.0093    | 44209   | 38394   | 19905  | 19535  | 0.004            | 0.004 | 0.002 | 0.002 |
| (1655)                                    | 24.9213     | 0.6542    | 13832   | 13793   | 9576   | 11736  | 0.001            | 0.001 | 0.001 | 0.001 |
| (1642)                                    | 24.9546     | 3.2150    | 6133    | 6302    | 4968   | 5513   | 0.001            | 0.001 | 0.001 | 0.001 |
| (1774)                                    | 24.9713     | 0.2897    | 6709    | 6486    | 6121   | 6434   | 0.001            | 0.001 | 0.001 | 0.001 |
| Terpine-4-ol* (205)                       | 25.0713     | 1.7850    | 113088  | 107459  | 86044  | 88326  | 0.011            | 0.011 | 0.009 | 0.009 |
| (891)                                     | 25.0713     | 1.5701    | 17150   | 14801   | 9781   | 11512  | 0.002            | 0.001 | 0.001 | 0.001 |
| (1743)                                    | 25.0713     | 2.9720    | 7209    | 7510    | 5392   | 6187   | 0.001            | 0.001 | 0.001 | 0.001 |
| (584)                                     | 25.1046     | 1.0467    | 60531   | 46650   | 19754  | 21923  | 0.006            | 0.005 | 0.002 | 0.002 |
| (277)                                     | 25.2546     | 1.0748    | 196968  | 161166  | 70430  | 74395  | 0.019            | 0.016 | 0.007 | 0.007 |
| (Z)-3-Hexenyl butyrate* (664)             | 25.2879     | 1.5514    | 246258  | 267391  | 13460  | 14583  | 0.024            | 0.027 | 0.001 | 0.001 |
| (508)                                     | 25.3379     | 1.7009    | 29526   | 33771   | 20288  | 22448  | 0.003            | 0.003 | 0.002 | 0.002 |
| 2,6-Dimethyl-3,7-octadiene-2,6-diol (183) | 25.4379     | 2.8972    | 212902  | 209675  | 87407  | 84770  | 0.021            | 0.021 | 0.009 | 0.009 |
| 511 (342)                                 | 25.4546     | 2.2430    | 108806  | 103690  | 66249  | 84554  | 0.011            | 0.010 | 0.007 | 0.009 |
| Naphthalene (102)                         | 25.4546     | 2.0187    | 253481  | 258274  | 137108 | 150180 | 0.025            | 0.026 | 0.014 | 0.015 |
| (1758)                                    | 25.4879     | 0.0935    | 3663    | 3531    | 2470   | 2721   | 0.000            | 0.000 | 0.000 | 0.000 |
| (148)                                     | 25.5379     | 1.0748    | 328988  | 261366  | 119632 | 118420 | 0.032            | 0.026 | 0.012 | 0.012 |
| Hexyl butyrate* (676)                     | 25.5713     | 1.5140    | 95682   | 65999   | 16466  | 19583  | 0.009            | 0.007 | 0.002 | 0.002 |
| 2-Decanone (146)                          | 25.6213     | 1.8505    | 50714   | 51318   | 64461  | 61785  | 0.005            | 0.005 | 0.007 | 0.006 |
| (674)                                     | 25.6213     | 1.3832    | 24005   | 25923   | 16059  | 14674  | 0.002            | 0.003 | 0.002 | 0.001 |
| $\alpha$ -Terpineol* (70)                 | 25.6879     | 2.0000    | 447871  | 476152  | 254511 | 270953 | 0.044            | 0.048 | 0.026 | 0.027 |
| (667)                                     | 25.6879     | 2.3458    | 35670   | 33453   | 21291  | 24628  | 0.004            | 0.003 | 0.002 | 0.002 |
| (E)-2-Hexenyl butyrate (406)              | 25.7546     | 1.5327    | 73769   | 98909   | 38096  | 38357  | 0.007            | 0.010 | 0.004 | 0.004 |
| Methyl salicylate* (27)                   | 25.8879     | 2.1589    | 5170121 | 6007809 | 739293 | 764344 | 0.510            | 0.602 | 0.075 | 0.077 |
| (1324)                                    | 25.8879     | 3.3925    | 19608   | 20126   | 7428   | 9296   | 0.002            | 0.002 | 0.001 | 0.001 |
| (1395)                                    | 25.8879     | 3.4860    | 15765   | 16897   | 6629   | 6963   | 0.002            | 0.002 | 0.001 | 0.001 |
| (1732)                                    | 25.8879     | 3.9626    | 4291    | 4204    | 2387   | 2204   | 0.000            | 0.000 | 0.000 | 0.000 |
| (826)                                     | 25.9046     | 2.8224    | 32620   | 36677   | 9704   | 10380  | 0.003            | 0.004 | 0.001 | 0.001 |
| (1033)                                    | 25.9046     | 3.1028    | 56984   | 62621   | 26159  | 25866  | 0.006            | 0.006 | 0.003 | 0.003 |
| (1504)                                    | 25.9046     | 3.7944    | 16949   | 18595   | 7412   | 7337   | 0.002            | 0.002 | 0.001 | 0.001 |
| Dodecane (36)                             | 25.9213     | 1.0280    | 1535009 | 1204106 | 561722 | 583517 | 0.152            | 0.121 | 0.057 | 0.059 |
| (1629)                                    | 25.9546     | 0.6636    | 13146   | 13476   | 7278   | 7396   | 0.001            | 0.001 | 0.001 | 0.001 |
| (1712)                                    | 25.9713     | 0.1308    | 11678   | 12226   | 6039   | 5779   | 0.001            | 0.001 | 0.001 | 0.001 |
| (1678)                                    | 25.9879     | 0.4860    | 11205   | 11806   | 6148   | 6676   | 0.001            | 0.001 | 0.001 | 0.001 |
| Estragole* (163)                          | 26.0213     | 1.8037    | 81472   | 82343   | 90050  | 76273  | 0.008            | 0.008 | 0.009 | 0.008 |
| (549)                                     | 26.0379     | 1.6075    | 42080   | 44740   | 32080  | 30726  | 0.004            | 0.004 | 0.003 | 0.003 |
| (1708)                                    | 26.0879     | 3.4019    | 8634    | 10027   | 5623   | 6170   | 0.001            | 0.001 | 0.001 | 0.001 |
| (642)                                     | 26.1379     | 2.4393    | 18191   | 22564   | 13001  | 12765  | 0.002            | 0.002 | 0.001 | 0.001 |
| (1547)                                    | 26.1379     | 3.6075    | 15355   | 16681   | 10192  | 11728  | 0.002            | 0.002 | 0.001 | 0.001 |



| Compound Name                    | RT 1D (min) | RT 2D (s) | Volume |        |        |        | Percent Response |       |       |       |
|----------------------------------|-------------|-----------|--------|--------|--------|--------|------------------|-------|-------|-------|
|                                  |             |           | HM_1   | HM_2   | LM_1   | LM_2   | HM_1             | HM_2  | LM_1  | LM_2  |
| Safranal (62)                    | 26.1546     | 2.0935    | 506406 | 703750 | 341696 | 302642 | 0.050            | 0.070 | 0.035 | 0.031 |
| (905)                            | 26.1546     | 2.5794    | 34572  | 41135  | 26083  | 26320  | 0.003            | 0.004 | 0.003 | 0.003 |
| (1591)                           | 26.2046     | 0.0467    | 4634   | 4468   | 4029   | 3869   | 0.000            | 0.000 | 0.000 | 0.000 |
| Decanal* (161)                   | 26.2379     | 1.8131    | 139803 | 106528 | 98823  | 74067  | 0.014            | 0.011 | 0.010 | 0.007 |
| (473)                            | 26.2713     | 1.0561    | 188832 | 151239 | 74502  | 74965  | 0.019            | 0.015 | 0.008 | 0.008 |
| (1013)                           | 26.5046     | 1.5234    | 29664  | 28799  | 18359  | 17597  | 0.003            | 0.003 | 0.002 | 0.002 |
| (1243)                           | 26.5046     | 2.4112    | 8336   | 9435   | 6171   | 7637   | 0.001            | 0.001 | 0.001 | 0.001 |
| (265)                            | 26.5546     | 1.9907    | 69306  | 62671  | 54753  | 55962  | 0.007            | 0.006 | 0.006 | 0.006 |
| 513 (238)                        | 26.6213     | 1.0561    | 325938 | 238318 | 108101 | 109565 | 0.032            | 0.024 | 0.011 | 0.011 |
| 129 (491)                        | 26.6213     | 2.1402    | 15720  | 23049  | 10406  | 15680  | 0.002            | 0.002 | 0.001 | 0.002 |
| (835)                            | 26.6546     | 2.2991    | 11202  | 12324  | 9915   | 10169  | 0.001            | 0.001 | 0.001 | 0.001 |
| (1581)                           | 26.6879     | 2.6729    | 8449   | 8714   | 6778   | 7841   | 0.001            | 0.001 | 0.001 | 0.001 |
| (E,E)-2,4-Nonadienal* (1052)     | 26.6879     | 2.4019    | 10916  | 13351  | 9044   | 10746  | 0.001            | 0.001 | 0.001 | 0.001 |
| (1405)                           | 26.7213     | 1.5514    | 14948  | 13662  | 8177   | 9189   | 0.001            | 0.001 | 0.001 | 0.001 |
| (492)                            | 26.8379     | 1.1121    | 30066  | 30489  | 13974  | 15726  | 0.003            | 0.003 | 0.001 | 0.002 |
| (1041)                           | 26.9546     | 2.6168    | 9640   | 8792   | 7168   | 8846   | 0.001            | 0.001 | 0.001 | 0.001 |
| 131 (46)                         | 26.9713     | 2.0748    | 430743 | 370072 | 313850 | 330749 | 0.043            | 0.037 | 0.032 | 0.033 |
| 2-Phenoxyethanol (259)           | 26.9713     | 3.0467    | 85500  | 76764  | 57316  | 101568 | 0.008            | 0.008 | 0.006 | 0.010 |
| (1444)                           | 26.9713     | 3.6075    | 13786  | 12955  | 10034  | 12301  | 0.001            | 0.001 | 0.001 | 0.001 |
| (1685)                           | 26.9879     | 3.8598    | 7197   | 6165   | 5273   | 6204   | 0.001            | 0.001 | 0.001 | 0.001 |
| (1699)                           | 27.0046     | 0.5514    | 8843   | 8563   | 7990   | 7492   | 0.001            | 0.001 | 0.001 | 0.001 |
| (874)                            | 27.0213     | 1.6355    | 25472  | 26545  | 18556  | 20497  | 0.003            | 0.003 | 0.002 | 0.002 |
| (391)                            | 27.0379     | 1.1028    | 154324 | 120079 | 52474  | 58419  | 0.015            | 0.012 | 0.005 | 0.006 |
| (1245)                           | 27.0546     | 1.5234    | 14605  | 13840  | 10631  | 9184   | 0.001            | 0.001 | 0.001 | 0.001 |
| (1721)                           | 27.1213     | 0.0654    | 3139   | 3275   | 2560   | 3006   | 0.000            | 0.000 | 0.000 | 0.000 |
| $\beta$ -Cyclocitral* (22)       | 27.1546     | 2.0935    | 535811 | 491117 | 678725 | 652314 | 0.053            | 0.049 | 0.069 | 0.066 |
| (1660)                           | 27.1879     | 3.6355    | 7912   | 7161   | 7086   | 8107   | 0.001            | 0.001 | 0.001 | 0.001 |
| (488)                            | 27.2213     | 1.0654    | 91970  | 71289  | 33997  | 32056  | 0.009            | 0.007 | 0.003 | 0.003 |
| (566)                            | 27.2379     | 2.7850    | 37222  | 31233  | 32941  | 37278  | 0.004            | 0.003 | 0.003 | 0.004 |
| (618)                            | 27.2546     | 1.9346    | 20617  | 26543  | 13995  | 14543  | 0.002            | 0.003 | 0.001 | 0.001 |
| (1744)                           | 27.2879     | 0.1682    | 10201  | 10291  | 9366   | 10106  | 0.001            | 0.001 | 0.001 | 0.001 |
| Nerol* (404)                     | 27.3546     | 2.0374    | 73069  | 85912  | 33391  | 33728  | 0.007            | 0.009 | 0.003 | 0.003 |
| (883)                            | 27.3546     | 2.4393    | 23308  | 19837  | 16451  | 19551  | 0.002            | 0.002 | 0.002 | 0.002 |
| (580)                            | 27.3713     | 1.1308    | 33248  | 27799  | 16247  | 16313  | 0.003            | 0.003 | 0.002 | 0.002 |
| (901)                            | 27.4379     | 3.6449    | 29252  | 26102  | 22773  | 24535  | 0.003            | 0.003 | 0.002 | 0.002 |
| (Z)-3-Hexenyl isovalerate* (210) | 27.4379     | 1.5327    | 123115 | 96096  | 61058  | 59932  | 0.012            | 0.010 | 0.006 | 0.006 |
| (546)                            | 27.5213     | 1.0654    | 109553 | 90039  | 42750  | 41727  | 0.011            | 0.009 | 0.004 | 0.004 |
| Bornylene (220)                  | 27.5379     | 1.5701    | 113913 | 150579 | 45025  | 53994  | 0.011            | 0.015 | 0.005 | 0.005 |
| (1486)                           | 27.5879     | 2.6916    | 8579   | 7180   | 5603   | 6482   | 0.001            | 0.001 | 0.001 | 0.001 |
| (633)                            | 27.7046     | 1.0561    | 34620  | 24357  | 14293  | 13933  | 0.003            | 0.002 | 0.001 | 0.001 |
| (767)                            | 27.7546     | 1.7290    | 13627  | 12407  | 8714   | 9559   | 0.001            | 0.001 | 0.001 | 0.001 |

| Compound Name                    | RT 1D (min) | RT 2D (s) | Volume |        |        |        | Percent Response |       |       |       |
|----------------------------------|-------------|-----------|--------|--------|--------|--------|------------------|-------|-------|-------|
|                                  |             |           | HM_1   | HM_2   | LM_1   | LM_2   | HM_1             | HM_2  | LM_1  | LM_2  |
| (E)-2-Hexenyl isovalerate* (114) | 27.8213     | 1.5047    | 218301 | 209675 | 117724 | 116846 | 0.022            | 0.021 | 0.012 | 0.012 |
| (988)                            | 27.8213     | 2.6916    | 7402   | 6838   | 5158   | 5715   | 0.001            | 0.001 | 0.001 | 0.001 |
| (872)                            | 27.8713     | 2.0561    | 32807  | 32682  | 15357  | 18647  | 0.003            | 0.003 | 0.002 | 0.002 |
| (1321)                           | 27.9213     | 3.6262    | 15130  | 13505  | 11283  | 11592  | 0.001            | 0.001 | 0.001 | 0.001 |
| (1359)                           | 27.9213     | 3.7103    | 8188   | 8361   | 5170   | 6582   | 0.001            | 0.001 | 0.001 | 0.001 |
| (528)                            | 27.9379     | 1.9346    | 26169  | 26708  | 16250  | 19012  | 0.003            | 0.003 | 0.002 | 0.002 |
| (1180)                           | 27.9879     | 3.9626    | 1671   | 1373   | 988    | 1672   | 0.000            | 0.000 | 0.000 | 0.000 |
| 516 (120)                        | 28.0046     | 1.1215    | 443833 | 347816 | 154310 | 156682 | 0.044            | 0.035 | 0.016 | 0.016 |
| 132 (75)                         | 28.0213     | 2.5888    | 201287 | 192329 | 181775 | 185809 | 0.020            | 0.019 | 0.019 | 0.019 |
| (425)                            | 28.0213     | 2.9252    | 48794  | 44156  | 40556  | 42008  | 0.005            | 0.004 | 0.004 | 0.004 |
| (1183)                           | 28.0213     | 3.4486    | 10949  | 11194  | 9160   | 8924   | 0.001            | 0.001 | 0.001 | 0.001 |
| (1415)                           | 28.0213     | 3.8692    | 10506  | 9947   | 8620   | 9577   | 0.001            | 0.001 | 0.001 | 0.001 |
| (1574)                           | 28.1046     | 0.3925    | 9667   | 7959   | 15756  | 7788   | 0.001            | 0.001 | 0.002 | 0.001 |
| 518 (309)                        | 28.1713     | 1.0935    | 147222 | 112469 | 54014  | 55060  | 0.015            | 0.011 | 0.006 | 0.006 |
| (1319)                           | 28.1713     | 3.5794    | 11118  | 10936  | 9405   | 9483   | 0.001            | 0.001 | 0.001 | 0.001 |
| (494)                            | 28.2213     | 2.2336    | 31921  | 25888  | 22380  | 23238  | 0.003            | 0.003 | 0.002 | 0.002 |
| (610)                            | 28.2213     | 1.8224    | 24801  | 21806  | 20661  | 24331  | 0.002            | 0.002 | 0.002 | 0.002 |
| (1061)                           | 28.2213     | 3.4206    | 13328  | 9519   | 10224  | 12845  | 0.001            | 0.001 | 0.001 | 0.001 |
| (1109)                           | 28.2546     | 2.5327    | 20771  | 19958  | 13800  | 15101  | 0.002            | 0.002 | 0.001 | 0.002 |
| (1475)                           | 28.2713     | 2.8411    | 9847   | 9091   | 8264   | 9357   | 0.001            | 0.001 | 0.001 | 0.001 |
| (1620)                           | 28.2879     | 0.1589    | 5135   | 4885   | 5022   | 5356   | 0.001            | 0.000 | 0.001 | 0.001 |
| (806)                            | 28.3046     | 1.5140    | 24640  | 19319  | 18060  | 16768  | 0.002            | 0.002 | 0.002 | 0.002 |
| (525)                            | 28.4213     | 1.0280    | 100896 | 76543  | 41965  | 41363  | 0.010            | 0.008 | 0.004 | 0.004 |
| Carvone (465)                    | 28.4713     | 2.2523    | 64986  | 64235  | 31783  | 35187  | 0.006            | 0.006 | 0.003 | 0.004 |
| Geraniol* (312)                  | 28.5213     | 2.0561    | 507123 | 537842 | 67925  | 73205  | 0.050            | 0.054 | 0.007 | 0.007 |
| (1240)                           | 28.5546     | 2.5234    | 24327  | 30652  | 13181  | 15414  | 0.002            | 0.003 | 0.001 | 0.002 |
| Linalyl acetate (255)            | 28.6213     | 1.5888    | 58209  | 53826  | 48393  | 52925  | 0.006            | 0.005 | 0.005 | 0.005 |
| (341)                            | 28.7379     | 1.0841    | 206739 | 154507 | 65448  | 67013  | 0.020            | 0.015 | 0.007 | 0.007 |
| (1253)                           | 28.7713     | 2.8505    | 29736  | 29014  | 14030  | 13852  | 0.003            | 0.003 | 0.001 | 0.001 |
| (1216)                           | 28.8213     | 3.5701    | 13649  | 12463  | 9456   | 10519  | 0.001            | 0.001 | 0.001 | 0.001 |
| Phenylethyl acetate (227)        | 28.8879     | 2.1589    | 71377  | 66670  | 44681  | 67538  | 0.007            | 0.007 | 0.005 | 0.007 |
| (530)                            | 28.8879     | 1.4766    | 51097  | 47153  | 28470  | 29297  | 0.005            | 0.005 | 0.003 | 0.003 |
| Homocyclocitral (315)            | 28.9046     | 2.0187    | 56061  | 52251  | 61030  | 39169  | 0.006            | 0.005 | 0.006 | 0.004 |
| (1312)                           | 28.9046     | 2.6075    | 10262  | 9657   | 8070   | 8494   | 0.001            | 0.001 | 0.001 | 0.001 |
| 519 (266)                        | 28.9213     | 1.0374    | 291502 | 235183 | 103571 | 115564 | 0.029            | 0.024 | 0.011 | 0.012 |
| Nonanoic acid* (123)             | 28.9546     | 2.8692    | 270526 | 247719 | 106367 | 169736 | 0.027            | 0.025 | 0.011 | 0.017 |
| (1132)                           | 28.9546     | 3.7850    | 18251  | 15005  | 11202  | 13272  | 0.002            | 0.002 | 0.001 | 0.001 |
| (1082)                           | 28.9713     | 3.5794    | 14922  | 13360  | 8320   | 11541  | 0.001            | 0.001 | 0.001 | 0.001 |
| (1364)                           | 28.9713     | 3.9626    | 2951   | 2848   | 2008   | 2380   | 0.000            | 0.000 | 0.000 | 0.000 |
| (1381)                           | 29.0213     | 0.5234    | 19508  | 18216  | 12723  | 14859  | 0.002            | 0.002 | 0.001 | 0.001 |
| (1351)                           | 29.0379     | 0.0935    | 22925  | 21630  | 15198  | 18722  | 0.002            | 0.002 | 0.002 | 0.002 |

| Compound Name                 | RT 1D (min) | RT 2D (s) | Volume  |        |        |        | Percent Response |       |       |       |
|-------------------------------|-------------|-----------|---------|--------|--------|--------|------------------|-------|-------|-------|
|                               |             |           | HM_1    | HM_2   | LM_1   | LM_2   | HM_1             | HM_2  | LM_1  | LM_2  |
| (594)                         | 29.1046     | 2.5234    | 32272   | 29135  | 23172  | 27096  | 0.003            | 0.003 | 0.002 | 0.003 |
| (487)                         | 29.2379     | 1.0467    | 53429   | 40935  | 19763  | 22083  | 0.005            | 0.004 | 0.002 | 0.002 |
| (992)                         | 29.2713     | 1.4112    | 30403   | 28898  | 20946  | 21949  | 0.003            | 0.003 | 0.002 | 0.002 |
| (738)                         | 29.3046     | 1.9346    | 26841   | 28223  | 12729  | 16891  | 0.003            | 0.003 | 0.001 | 0.002 |
| (1605)                        | 29.3046     | 0.6075    | 10851   | 10054  | 8188   | 9349   | 0.001            | 0.001 | 0.001 | 0.001 |
| (541)                         | 29.3379     | 1.7570    | 27785   | 28486  | 14910  | 17259  | 0.003            | 0.003 | 0.002 | 0.002 |
| (617)                         | 29.3379     | 1.7103    | 38288   | 32499  | 25162  | 22887  | 0.004            | 0.003 | 0.003 | 0.002 |
| Citral* (980)                 | 29.3546     | 2.2804    | 50922   | 51579  | 28978  | 31334  | 0.005            | 0.005 | 0.003 | 0.003 |
| (348)                         | 29.3546     | 1.0280    | 160298  | 122326 | 55689  | 61094  | 0.016            | 0.012 | 0.006 | 0.006 |
| (1400)                        | 29.3713     | 2.7383    | 14725   | 11188  | 9156   | 9529   | 0.001            | 0.001 | 0.001 | 0.001 |
| (1481)                        | 29.3879     | 2.9907    | 19686   | 21602  | 9161   | 9532   | 0.002            | 0.002 | 0.001 | 0.001 |
| (1684)                        | 29.3879     | 3.4393    | 7614    | 7266   | 5854   | 6372   | 0.001            | 0.001 | 0.001 | 0.001 |
| (1615)                        | 29.5546     | 2.6916    | 11633   | 7475   | 5701   | 6725   | 0.001            | 0.001 | 0.001 | 0.001 |
| (1111)                        | 29.5879     | 1.9252    | 35647   | 36596  | 18520  | 20046  | 0.004            | 0.004 | 0.002 | 0.002 |
| (991)                         | 29.6546     | 1.4393    | 22941   | 20680  | 16722  | 16756  | 0.002            | 0.002 | 0.002 | 0.002 |
| (493)                         | 29.7213     | 3.0561    | 36394   | 31372  | 28198  | 31633  | 0.004            | 0.003 | 0.003 | 0.003 |
| (1420)                        | 29.7879     | 2.3645    | 11724   | 11847  | 8498   | 8655   | 0.001            | 0.001 | 0.001 | 0.001 |
| (1466)                        | 29.8046     | 2.6168    | 13358   | 11605  | 11069  | 11952  | 0.001            | 0.001 | 0.001 | 0.001 |
| (283)                         | 29.8379     | 1.0748    | 228194  | 171034 | 75256  | 81150  | 0.023            | 0.017 | 0.008 | 0.008 |
| 520 (254)                     | 29.9546     | 1.1121    | 127304  | 111100 | 43704  | 49272  | 0.013            | 0.011 | 0.004 | 0.005 |
| (1446)                        | 29.9546     | 2.8224    | 9535    | 8372   | 8536   | 8355   | 0.001            | 0.001 | 0.001 | 0.001 |
| Pentyl hexanoate (574)        | 30.0879     | 1.5047    | 57451   | 54142  | 26677  | 29902  | 0.006            | 0.005 | 0.003 | 0.003 |
| (374)                         | 30.1546     | 1.9813    | 58998   | 51863  | 46367  | 43129  | 0.006            | 0.005 | 0.005 | 0.004 |
| (1279)                        | 30.1546     | 2.4486    | 28403   | 28356  | 19457  | 21849  | 0.003            | 0.003 | 0.002 | 0.002 |
| (1773)                        | 30.1713     | 3.9346    | 4337    | 3702   | 3248   | 3738   | 0.000            | 0.000 | 0.000 | 0.000 |
| Dihydrocitronellol (35)       | 30.2379     | 1.1121    | 1212350 | 964306 | 470750 | 527000 | 0.120            | 0.097 | 0.048 | 0.053 |
| 2-Undecanone (221)            | 30.3546     | 1.8505    | 114579  | 109049 | 92174  | 94307  | 0.011            | 0.011 | 0.009 | 0.010 |
| (1450)                        | 30.4046     | 2.2991    | 10054   | 9154   | 8052   | 7392   | 0.001            | 0.001 | 0.001 | 0.001 |
| (1003)                        | 30.5213     | 3.2710    | 22120   | 19385  | 16617  | 18614  | 0.002            | 0.002 | 0.002 | 0.002 |
| (481)                         | 30.5546     | 1.7383    | 45390   | 44486  | 34636  | 35300  | 0.004            | 0.004 | 0.004 | 0.004 |
| (84)                          | 30.5713     | 3.9533    | 162283  | 160721 | 578982 | 179334 | 0.016            | 0.016 | 0.059 | 0.018 |
| Tridecane (56)                | 30.5879     | 1.0467    | 933964  | 737967 | 415872 | 436169 | 0.092            | 0.074 | 0.042 | 0.044 |
| (1065)                        | 30.5879     | 0.4206    | 27155   | 23951  | 28552  | 22851  | 0.003            | 0.002 | 0.003 | 0.002 |
| (1458)                        | 30.5879     | 2.5607    | 8343    | 8201   | 7484   | 7943   | 0.001            | 0.001 | 0.001 | 0.001 |
| 2-Methylnaphthalene (180)     | 30.6379     | 2.0654    | 129363  | 126217 | 82612  | 81983  | 0.013            | 0.013 | 0.008 | 0.008 |
| (924)                         | 30.6713     | 1.5888    | 31618   | 28796  | 22579  | 21506  | 0.003            | 0.003 | 0.002 | 0.002 |
| (1261)                        | 30.6713     | 0.6542    | 14374   | 12989  | 15326  | 12548  | 0.001            | 0.001 | 0.002 | 0.001 |
| 1-Nitro-2-phenylethane (1092) | 30.7879     | 3.2710    | 43529   | 43761  | 23379  | 19835  | 0.004            | 0.004 | 0.002 | 0.002 |
| (1356)                        | 30.8046     | 2.9813    | 16710   | 13996  | 14540  | 14345  | 0.002            | 0.001 | 0.001 | 0.001 |
| (550)                         | 30.8379     | 2.2430    | 22236   | 24326  | 19607  | 20940  | 0.002            | 0.002 | 0.002 | 0.002 |
| (1252)                        | 30.8546     | 2.7757    | 11689   | 12108  | 9718   | 10388  | 0.001            | 0.001 | 0.001 | 0.001 |

| Compound Name             | RT 1D (min) | RT 2D (s) | Volume |        |        |        | Percent Response |       |       |       |
|---------------------------|-------------|-----------|--------|--------|--------|--------|------------------|-------|-------|-------|
|                           |             |           | HM_1   | HM_2   | LM_1   | LM_2   | HM_1             | HM_2  | LM_1  | LM_2  |
| Theaspirane A* (264)      | 30.9046     | 1.4673    | 62655  | 60865  | 37089  | 39877  | 0.006            | 0.006 | 0.004 | 0.004 |
| 522 (154)                 | 30.9546     | 1.1776    | 189434 | 158031 | 65006  | 80859  | 0.019            | 0.016 | 0.007 | 0.008 |
| (1060)                    | 30.9879     | 3.7570    | 13071  | 12206  | 13189  | 16803  | 0.001            | 0.001 | 0.001 | 0.002 |
| (200)                     | 31.0046     | 1.1121    | 179167 | 120406 | 69918  | 53800  | 0.018            | 0.012 | 0.007 | 0.005 |
| (29)                      | 31.0379     | 1.9346    | 209288 | 179649 | 108041 | 875030 | 0.021            | 0.018 | 0.011 | 0.088 |
| Indole (1140)             | 31.0879     | 0.0935    | 7030   | 6778   | 5845   | 10080  | 0.001            | 0.001 | 0.001 | 0.001 |
| (687)                     | 31.0879     | 2.9439    | 28186  | 26107  | 20704  | 41715  | 0.003            | 0.003 | 0.002 | 0.004 |
| (1028)                    | 31.0879     | 3.5794    | 12076  | 12005  | 10293  | 16283  | 0.001            | 0.001 | 0.001 | 0.002 |
| (1152)                    | 31.1046     | 3.9626    | 2148   | 2285   | 1689   | 3026   | 0.000            | 0.000 | 0.000 | 0.000 |
| (1015)                    | 31.1213     | 3.3645    | 11146  | 10619  | 8591   | 14112  | 0.001            | 0.001 | 0.001 | 0.001 |
| (1275)                    | 31.1379     | 0.5701    | 7629   | 6716   | 5463   | 9590   | 0.001            | 0.001 | 0.001 | 0.001 |
| 523 (194)                 | 31.1713     | 1.1121    | 258962 | 194144 | 89485  | 120877 | 0.026            | 0.019 | 0.009 | 0.012 |
| (1309)                    | 31.1713     | 0.4766    | 7398   | 6616   | 5910   | 9017   | 0.001            | 0.001 | 0.001 | 0.001 |
| (1427)                    | 31.2213     | 0.7290    | 10892  | 9878   | 9842   | 12245  | 0.001            | 0.001 | 0.001 | 0.001 |
| (707)                     | 31.2379     | 2.8224    | 10617  | 10647  | 9124   | 12881  | 0.001            | 0.001 | 0.001 | 0.001 |
| (942)                     | 31.3046     | 1.4393    | 17457  | 15179  | 10640  | 12577  | 0.002            | 0.002 | 0.001 | 0.001 |
| (632)                     | 31.3713     | 1.7196    | 19803  | 18474  | 17843  | 19460  | 0.002            | 0.002 | 0.002 | 0.002 |
| (1323)                    | 31.3713     | 2.6075    | 11284  | 11493  | 8534   | 9827   | 0.001            | 0.001 | 0.001 | 0.001 |
| (236)                     | 31.4046     | 1.1121    | 197078 | 158986 | 72921  | 82778  | 0.019            | 0.016 | 0.007 | 0.008 |
| 1-Methylnaphthalene (224) | 31.4213     | 2.0748    | 80642  | 74487  | 55518  | 62956  | 0.008            | 0.007 | 0.006 | 0.006 |
| (654)                     | 31.4379     | 2.3551    | 24710  | 25491  | 19731  | 24060  | 0.002            | 0.003 | 0.002 | 0.002 |
| 524 (189)                 | 31.5546     | 1.1028    | 236282 | 186637 | 91101  | 102596 | 0.023            | 0.019 | 0.009 | 0.010 |
| (573)                     | 31.5546     | 1.9252    | 15294  | 15721  | 15505  | 14735  | 0.002            | 0.002 | 0.002 | 0.001 |
| (290)                     | 31.5713     | 0.1308    | 91552  | 97116  | 83162  | 92827  | 0.009            | 0.010 | 0.008 | 0.009 |
| (1031)                    | 31.5713     | 2.9439    | 25914  | 25736  | 23775  | 25376  | 0.003            | 0.003 | 0.002 | 0.003 |
| (1686)                    | 31.5713     | 3.5047    | 7631   | 7384   | 7547   | 6828   | 0.001            | 0.001 | 0.001 | 0.001 |
| (1384)                    | 31.6213     | 0.5140    | 14985  | 14592  | 13623  | 14091  | 0.001            | 0.001 | 0.001 | 0.001 |
| Theaspirane B* (263)      | 31.6379     | 1.4953    | 120717 | 112036 | 70183  | 74601  | 0.012            | 0.011 | 0.007 | 0.008 |
| (512)                     | 31.7046     | 2.0000    | 37850  | 38749  | 27294  | 33283  | 0.004            | 0.004 | 0.003 | 0.003 |
| (444)                     | 31.7213     | 1.6822    | 34600  | 38105  | 18913  | 21897  | 0.003            | 0.004 | 0.002 | 0.002 |
| (107)                     | 31.8379     | 0.8692    | 215689 | 181362 | 153725 | 158338 | 0.021            | 0.018 | 0.016 | 0.016 |
| (308)                     | 31.8379     | 1.1215    | 71864  | 56469  | 27880  | 38413  | 0.007            | 0.006 | 0.003 | 0.004 |
| (741)                     | 31.9046     | 1.6168    | 14662  | 15165  | 10359  | 11275  | 0.001            | 0.002 | 0.001 | 0.001 |
| (1719)                    | 31.9546     | 3.0280    | 11141  | 10195  | 8542   | 9733   | 0.001            | 0.001 | 0.001 | 0.001 |
| (1037)                    | 31.9713     | 2.1308    | 20024  | 19221  | 15860  | 17547  | 0.002            | 0.002 | 0.002 | 0.002 |
| (317)                     | 32.0379     | 1.1215    | 110622 | 81848  | 41024  | 43247  | 0.011            | 0.008 | 0.004 | 0.004 |
| (1094)                    | 32.0379     | 3.6729    | 18951  | 17678  | 15605  | 17138  | 0.002            | 0.002 | 0.002 | 0.002 |
| (1425)                    | 32.0379     | 1.9720    | 7585   | 6999   | 5880   | 6803   | 0.001            | 0.001 | 0.001 | 0.001 |
| (1350)                    | 32.0546     | 2.8411    | 25049  | 25352  | 17643  | 19090  | 0.002            | 0.003 | 0.002 | 0.002 |
| (708)                     | 32.1379     | 1.6168    | 38990  | 37433  | 29737  | 32371  | 0.004            | 0.004 | 0.003 | 0.003 |
| (184)                     | 32.2213     | 1.0654    | 266674 | 190131 | 95965  | 113403 | 0.026            | 0.019 | 0.010 | 0.011 |

| Compound Name          | RT 1D (min) | RT 2D (s) | Volume |        |        |        | Percent Response |       |       |       |
|------------------------|-------------|-----------|--------|--------|--------|--------|------------------|-------|-------|-------|
|                        |             |           | HM_1   | HM_2   | LM_1   | LM_2   | HM_1             | HM_2  | LM_1  | LM_2  |
| (1553)                 | 32.2213     | 0.5234    | 13591  | 10793  | 10567  | 11151  | 0.001            | 0.001 | 0.001 | 0.001 |
| (1532)                 | 32.2546     | 0.7477    | 11066  | 9689   | 7732   | 9435   | 0.001            | 0.001 | 0.001 | 0.001 |
| (1006)                 | 32.3046     | 1.7196    | 14192  | 12343  | 8389   | 10143  | 0.001            | 0.001 | 0.001 | 0.001 |
| (1184)                 | 32.3379     | 1.4299    | 15832  | 13742  | 11034  | 12412  | 0.002            | 0.001 | 0.001 | 0.001 |
| (1769)                 | 32.3379     | 2.8692    | 5859   | 5042   | 4413   | 4529   | 0.001            | 0.001 | 0.000 | 0.000 |
| (272)                  | 32.3713     | 1.0654    | 126673 | 109839 | 48081  | 54475  | 0.013            | 0.011 | 0.005 | 0.005 |
| (1577)                 | 32.3713     | 3.5234    | 7224   | 5835   | 5168   | 5422   | 0.001            | 0.001 | 0.001 | 0.001 |
| (1651)                 | 32.5046     | 3.1308    | 20001  | 17593  | 15737  | 17161  | 0.002            | 0.002 | 0.002 | 0.002 |
| (1080)                 | 32.5213     | 1.6916    | 15392  | 14152  | 10100  | 10668  | 0.002            | 0.001 | 0.001 | 0.001 |
| (1616)                 | 32.5879     | 1.9813    | 7919   | 7324   | 5922   | 6426   | 0.001            | 0.001 | 0.001 | 0.001 |
| Heptylcyclohexane (61) | 32.6379     | 1.1869    | 559650 | 441745 | 248270 | 267386 | 0.055            | 0.044 | 0.025 | 0.027 |
| (455)                  | 32.6379     | 3.6262    | 24463  | 20234  | 20353  | 20773  | 0.002            | 0.002 | 0.002 | 0.002 |
| 170 (423)              | 32.6546     | 3.5607    | 29149  | 37268  | 28610  | 31326  | 0.003            | 0.004 | 0.003 | 0.003 |
| (821)                  | 32.6713     | 1.5607    | 39495  | 37567  | 27044  | 29858  | 0.004            | 0.004 | 0.003 | 0.003 |
| 525 (91)               | 32.7379     | 1.0935    | 404781 | 309844 | 163933 | 178158 | 0.040            | 0.031 | 0.017 | 0.018 |
| (1057)                 | 32.7546     | 2.1869    | 9950   | 10845  | 6602   | 8954   | 0.001            | 0.001 | 0.001 | 0.001 |
| Triacetin (338)        | 32.8046     | 2.7850    | 54561  | 43326  | 24053  | 40385  | 0.005            | 0.004 | 0.002 | 0.004 |
| (1627)                 | 32.8379     | 3.1308    | 11097  | 11708  | 8808   | 9846   | 0.001            | 0.001 | 0.001 | 0.001 |
| (737)                  | 32.9046     | 1.7009    | 17517  | 16097  | 13013  | 14760  | 0.002            | 0.002 | 0.001 | 0.001 |
| (1683)                 | 32.9213     | 3.4953    | 7992   | 8309   | 5700   | 8282   | 0.001            | 0.001 | 0.001 | 0.001 |
| (223)                  | 33.0046     | 1.0467    | 266394 | 206388 | 109816 | 125974 | 0.026            | 0.021 | 0.011 | 0.013 |
| (1707)                 | 33.0379     | 2.9813    | 5996   | 5828   | 5018   | 4949   | 0.001            | 0.001 | 0.001 | 0.000 |
| (1738)                 | 33.0379     | 3.7103    | 7603   | 7056   | 5816   | 7234   | 0.001            | 0.001 | 0.001 | 0.001 |
| 26 (69)                | 33.1046     | 0.1028    | 415715 | 388270 | 342612 | 403624 | 0.041            | 0.039 | 0.035 | 0.041 |
| (903)                  | 33.1046     | 1.4673    | 17421  | 15149  | 11585  | 13095  | 0.002            | 0.002 | 0.001 | 0.001 |
| (1391)                 | 33.1046     | 0.7850    | 6902   | 6437   | 6255   | 6454   | 0.001            | 0.001 | 0.001 | 0.001 |
| (1408)                 | 33.1213     | 0.8879    | 7623   | 6422   | 6060   | 5772   | 0.001            | 0.001 | 0.001 | 0.001 |
| (1528)                 | 33.1546     | 2.7196    | 9950   | 10592  | 8823   | 9482   | 0.001            | 0.001 | 0.001 | 0.001 |
| (355)                  | 33.1713     | 2.3178    | 48687  | 45575  | 34232  | 41638  | 0.005            | 0.005 | 0.003 | 0.004 |
| (306)                  | 33.2046     | 1.0748    | 129559 | 93803  | 48748  | 54685  | 0.013            | 0.009 | 0.005 | 0.006 |
| (917)                  | 33.2879     | 1.7103    | 24485  | 17574  | 12836  | 13962  | 0.002            | 0.002 | 0.001 | 0.001 |
| Decanoic acid* (239)   | 33.3713     | 2.7009    | 147772 | 104673 | 89503  | 68675  | 0.015            | 0.010 | 0.009 | 0.007 |
| (509)                  | 33.3713     | 1.3738    | 34255  | 30217  | 20520  | 26906  | 0.003            | 0.003 | 0.002 | 0.003 |
| (1214)                 | 33.3713     | 3.1589    | 22278  | 18502  | 15751  | 15500  | 0.002            | 0.002 | 0.002 | 0.002 |
| (1498)                 | 33.3713     | 3.4393    | 8763   | 7484   | 5923   | 5991   | 0.001            | 0.001 | 0.001 | 0.001 |
| (1535)                 | 33.4046     | 2.4673    | 8247   | 7504   | 6150   | 6416   | 0.001            | 0.001 | 0.001 | 0.001 |
| (320)                  | 33.4713     | 1.5981    | 70544  | 70604  | 52639  | 53508  | 0.007            | 0.007 | 0.005 | 0.005 |
| (595)                  | 33.5046     | 2.0935    | 31767  | 26895  | 25395  | 26847  | 0.003            | 0.003 | 0.003 | 0.003 |
| (1049)                 | 33.5546     | 1.9533    | 11819  | 11193  | 9559   | 10723  | 0.001            | 0.001 | 0.001 | 0.001 |
| (539)                  | 33.5713     | 3.4299    | 33063  | 33088  | 24300  | 27520  | 0.003            | 0.003 | 0.002 | 0.003 |
| (853)                  | 33.5879     | 1.4673    | 18765  | 18311  | 14670  | 14275  | 0.002            | 0.002 | 0.001 | 0.001 |

| Compound Name                                            | RT 1D (min) | RT 2D (s) | Volume  |        |        |        | Percent Response |       |       |       |
|----------------------------------------------------------|-------------|-----------|---------|--------|--------|--------|------------------|-------|-------|-------|
|                                                          |             |           | HM_1    | HM_2   | LM_1   | LM_2   | HM_1             | HM_2  | LM_1  | LM_2  |
| (1694)                                                   | 33.7046     | 0.5701    | 8265    | 7609   | 5995   | 6845   | 0.001            | 0.001 | 0.001 | 0.001 |
| (350)                                                    | 33.7046     | 3.7944    | 54138   | 51914  | 47006  | 49126  | 0.005            | 0.005 | 0.005 | 0.005 |
| 526 (55)                                                 | 33.7713     | 1.0748    | 1011566 | 807544 | 437565 | 498813 | 0.100            | 0.081 | 0.045 | 0.050 |
| (1624)                                                   | 33.8213     | 2.3551    | 9039    | 8883   | 6380   | 6859   | 0.001            | 0.001 | 0.001 | 0.001 |
| (1696)                                                   | 33.8879     | 2.8318    | 6869    | 6641   | 5090   | 5094   | 0.001            | 0.001 | 0.001 | 0.001 |
| (695)                                                    | 33.9379     | 1.8037    | 37802   | 36928  | 27179  | 29278  | 0.004            | 0.004 | 0.003 | 0.003 |
| 528 (137)                                                | 33.9713     | 1.2336    | 237676  | 191954 | 111863 | 125102 | 0.023            | 0.019 | 0.011 | 0.013 |
| (153)                                                    | 34.0046     | 1.0935    | 234164  | 182982 | 94533  | 109640 | 0.023            | 0.018 | 0.010 | 0.011 |
| (1604)                                                   | 34.0546     | 3.3551    | 15726   | 14242  | 12765  | 13710  | 0.002            | 0.001 | 0.001 | 0.001 |
| Butyl benzoate (108)                                     | 34.0713     | 1.9907    | 190909  | 182164 | 172565 | 167563 | 0.019            | 0.018 | 0.018 | 0.017 |
| 3-Hydroxy-2,4,4-trimethylpentyl-2-methylpropanoate (187) | 34.1046     | 2.2710    | 83457   | 82133  | 57531  | 73555  | 0.008            | 0.008 | 0.006 | 0.007 |
| (1274)                                                   | 34.1546     | 2.9533    | 33450   | 30058  | 26090  | 27466  | 0.003            | 0.003 | 0.003 | 0.003 |
| (Z)-3-Hexenyl hexanoate* (212)                           | 34.2379     | 1.5701    | 485672  | 512881 | 52755  | 73692  | 0.048            | 0.051 | 0.005 | 0.007 |
| (894)                                                    | 34.2379     | 2.4486    | 16856   | 14687  | 10798  | 12333  | 0.002            | 0.001 | 0.001 | 0.001 |
| (590)                                                    | 34.2546     | 2.2336    | 36288   | 24191  | 23273  | 19728  | 0.004            | 0.002 | 0.002 | 0.002 |
| (1756)                                                   | 34.2713     | 0.8037    | 6600    | 5942   | 4726   | 5815   | 0.001            | 0.001 | 0.000 | 0.001 |
| $\alpha$ -Cubebene (300)                                 | 34.3879     | 1.3832    | 76537   | 66922  | 36211  | 40328  | 0.008            | 0.007 | 0.004 | 0.004 |
| (647)                                                    | 34.4046     | 2.0374    | 29106   | 27843  | 19261  | 22132  | 0.003            | 0.003 | 0.002 | 0.002 |
| (1462)                                                   | 34.4046     | 3.2056    | 17861   | 15817  | 13488  | 14885  | 0.002            | 0.002 | 0.001 | 0.002 |
| (5E)-3-Methyl-5-undecene (78)                            | 34.4379     | 1.1308    | 630888  | 488159 | 262138 | 288165 | 0.062            | 0.049 | 0.027 | 0.029 |
| (1495)                                                   | 34.4546     | 3.4299    | 12515   | 12287  | 10020  | 11313  | 0.001            | 0.001 | 0.001 | 0.001 |
| (1777)                                                   | 34.5379     | 0.4860    | 8761    | 7080   | 6396   | 6936   | 0.001            | 0.001 | 0.001 | 0.001 |
| (1731)                                                   | 34.5546     | 0.0654    | 2151    | 2039   | 1655   | 1649   | 0.000            | 0.000 | 0.000 | 0.000 |
| (1207)                                                   | 34.6046     | 1.8411    | 11654   | 10329  | 6619   | 6739   | 0.001            | 0.001 | 0.001 | 0.001 |
| Hexyl hexanoate (313)                                    | 34.6213     | 1.4953    | 89128   | 95979  | 36016  | 38160  | 0.009            | 0.010 | 0.004 | 0.004 |
| (1040)                                                   | 34.6379     | 2.0561    | 18005   | 17486  | 10284  | 10019  | 0.002            | 0.002 | 0.001 | 0.001 |
| (1221)                                                   | 34.6546     | 2.5234    | 25911   | 23467  | 20469  | 20018  | 0.003            | 0.002 | 0.002 | 0.002 |
| (E)-2-Hexenyl hexanoate (471)                            | 34.6713     | 1.5794    | 42689   | 50532  | 20827  | 29287  | 0.004            | 0.005 | 0.002 | 0.003 |
| 5-Tetradecene (66)                                       | 34.7046     | 1.1215    | 629133  | 497597 | 295910 | 325155 | 0.062            | 0.050 | 0.030 | 0.033 |
| (923)                                                    | 34.7713     | 2.9252    | 20380   | 18366  | 18031  | 19056  | 0.002            | 0.002 | 0.002 | 0.002 |
| (1550)                                                   | 34.7713     | 2.2056    | 6257    | 6523   | 4735   | 5238   | 0.001            | 0.001 | 0.000 | 0.001 |
| $\beta$ -Bourbonene (335)                                | 34.8046     | 1.3738    | 52947   | 51233  | 29416  | 30556  | 0.005            | 0.005 | 0.003 | 0.003 |
| (855)                                                    | 34.8379     | 1.8411    | 18436   | 17429  | 14589  | 16956  | 0.002            | 0.002 | 0.001 | 0.002 |
| (1578)                                                   | 34.8379     | 2.6636    | 8838    | 8224   | 8138   | 7559   | 0.001            | 0.001 | 0.001 | 0.001 |
| (1782)                                                   | 34.9879     | 0.3178    | 6688    | 5624   | 5787   | 5898   | 0.001            | 0.001 | 0.001 | 0.001 |
| (609)                                                    | 35.0213     | 1.7009    | 25173   | 22971  | 18602  | 20181  | 0.002            | 0.002 | 0.002 | 0.002 |
| 530 (33)                                                 | 35.0379     | 1.0748    | 982607  | 783105 | 459725 | 540229 | 0.097            | 0.078 | 0.047 | 0.054 |
| (1014)                                                   | 35.0379     | 2.0374    | 17416   | 15954  | 13158  | 12584  | 0.002            | 0.002 | 0.001 | 0.001 |
| (571)                                                    | 35.1713     | 1.6916    | 20071   | 16738  | 13324  | 13570  | 0.002            | 0.002 | 0.001 | 0.001 |
| (810)                                                    | 35.1713     | 3.7103    | 90073   | 64650  | 35844  | 36156  | 0.009            | 0.006 | 0.004 | 0.004 |
| (1650)                                                   | 35.2046     | 2.7757    | 19666   | 20559  | 13125  | 11396  | 0.002            | 0.002 | 0.001 | 0.001 |

| Compound Name                 | RT 1D (min) | RT 2D (s) | Volume  |        |        |        | Percent Response |       |       |       |
|-------------------------------|-------------|-----------|---------|--------|--------|--------|------------------|-------|-------|-------|
|                               |             |           | HM_1    | HM_2   | LM_1   | LM_2   | HM_1             | HM_2  | LM_1  | LM_2  |
| Jasmone* (939)                | 35.2379     | 2.4486    | 138055  | 130499 | 18811  | 19104  | 0.014            | 0.013 | 0.002 | 0.002 |
| (1611)                        | 35.2379     | 0.1589    | 13418   | 10849  | 8300   | 7728   | 0.001            | 0.001 | 0.001 | 0.001 |
| 2-Methyltridecane (73)        | 35.3046     | 1.1215    | 676080  | 523558 | 291362 | 333231 | 0.067            | 0.052 | 0.030 | 0.034 |
| (334)                         | 35.3046     | 1.8224    | 44994   | 39973  | 32588  | 34712  | 0.004            | 0.004 | 0.003 | 0.003 |
| (1059)                        | 35.3379     | 2.4486    | 35978   | 29612  | 19773  | 25545  | 0.004            | 0.003 | 0.002 | 0.003 |
| Dodecanal (360)               | 35.4546     | 1.8131    | 113998  | 49573  | 51609  | 39601  | 0.011            | 0.005 | 0.005 | 0.004 |
| (564)                         | 35.5213     | 2.0467    | 39512   | 34124  | 30381  | 28713  | 0.004            | 0.003 | 0.003 | 0.003 |
| (1203)                        | 35.6879     | 0.8411    | 8905    | 8838   | 6193   | 8307   | 0.001            | 0.001 | 0.001 | 0.001 |
| (222)                         | 35.7046     | 1.1215    | 158512  | 125205 | 68074  | 77613  | 0.016            | 0.013 | 0.007 | 0.008 |
| (1417)                        | 35.7213     | 1.8318    | 8821    | 8467   | 7376   | 7618   | 0.001            | 0.001 | 0.001 | 0.001 |
| (1104)                        | 35.7713     | 2.3271    | 14784   | 13789  | 12535  | 12934  | 0.001            | 0.001 | 0.001 | 0.001 |
| (362)                         | 35.7879     | 1.4579    | 74694   | 67483  | 42959  | 44800  | 0.007            | 0.007 | 0.004 | 0.005 |
| (140)                         | 35.8879     | 1.1121    | 235499  | 178538 | 95897  | 115374 | 0.023            | 0.018 | 0.010 | 0.012 |
| (1531)                        | 35.9046     | 2.0935    | 15785   | 15349  | 12482  | 12928  | 0.002            | 0.002 | 0.001 | 0.001 |
| 544 (150)                     | 36.0379     | 1.1121    | 301446  | 231714 | 127786 | 150478 | 0.030            | 0.023 | 0.013 | 0.015 |
| (685)                         | 36.0546     | 1.4299    | 25031   | 22878  | 16522  | 18300  | 0.002            | 0.002 | 0.002 | 0.002 |
| (920)                         | 36.1213     | 1.6449    | 24691   | 22226  | 18259  | 19569  | 0.002            | 0.002 | 0.002 | 0.002 |
| (433)                         | 36.1713     | 2.0748    | 54026   | 52426  | 51685  | 48401  | 0.005            | 0.005 | 0.005 | 0.005 |
| (1710)                        | 36.2046     | 2.3832    | 6494    | 6474   | 5333   | 6053   | 0.001            | 0.001 | 0.001 | 0.001 |
| (1146)                        | 36.2379     | 3.4486    | 18760   | 18961  | 16606  | 18296  | 0.002            | 0.002 | 0.002 | 0.002 |
| (321)                         | 36.3213     | 1.1308    | 178153  | 140780 | 84117  | 90378  | 0.018            | 0.014 | 0.009 | 0.009 |
| $\beta$ -Caryophyllene* (131) | 36.3213     | 1.4860    | 334308  | 292619 | 101336 | 115171 | 0.033            | 0.029 | 0.010 | 0.012 |
| (1112)                        | 36.4379     | 2.8411    | 15071   | 14005  | 11535  | 12900  | 0.001            | 0.001 | 0.001 | 0.001 |
| $\alpha$ -Ionone* (172)       | 36.4713     | 2.1869    | 110809  | 107606 | 84093  | 86856  | 0.011            | 0.011 | 0.009 | 0.009 |
| (1118)                        | 36.5213     | 1.7477    | 13997   | 13239  | 10356  | 11475  | 0.001            | 0.001 | 0.001 | 0.001 |
| (203)                         | 36.6379     | 1.0841    | 359700  | 283260 | 169281 | 196539 | 0.036            | 0.028 | 0.017 | 0.020 |
| (1533)                        | 36.6713     | 2.3364    | 7469    | 6727   | 5568   | 5280   | 0.001            | 0.001 | 0.001 | 0.001 |
| (1500)                        | 36.6879     | 3.4206    | 20838   | 19747  | 18710  | 18548  | 0.002            | 0.002 | 0.002 | 0.002 |
| (652)                         | 36.7046     | 1.4206    | 26001   | 24328  | 16773  | 16799  | 0.003            | 0.002 | 0.002 | 0.002 |
| (1639)                        | 36.7046     | 1.9439    | 7015    | 6917   | 6535   | 6187   | 0.001            | 0.001 | 0.001 | 0.001 |
| (1209)                        | 36.7546     | 1.6822    | 9499    | 7789   | 7250   | 8006   | 0.001            | 0.001 | 0.001 | 0.001 |
| (1090)                        | 36.9546     | 2.0093    | 12121   | 12417  | 9385   | 8753   | 0.001            | 0.001 | 0.001 | 0.001 |
| (979)                         | 37.0213     | 2.1121    | 18147   | 18078  | 15307  | 15974  | 0.002            | 0.002 | 0.002 | 0.002 |
| Nonylcyclopentane (31)        | 37.1713     | 1.1963    | 1083517 | 880681 | 592245 | 693866 | 0.107            | 0.088 | 0.060 | 0.070 |
| (762)                         | 37.1713     | 1.6822    | 26438   | 24414  | 19598  | 24133  | 0.003            | 0.002 | 0.002 | 0.002 |
| (1095)                        | 37.1713     | 2.1121    | 13774   | 12149  | 10983  | 12955  | 0.001            | 0.001 | 0.001 | 0.001 |
| (1297)                        | 37.3379     | 2.8598    | 15439   | 14697  | 15131  | 15699  | 0.002            | 0.001 | 0.002 | 0.002 |
| (1491)                        | 37.3546     | 3.4766    | 18863   | 19746  | 17655  | 18932  | 0.002            | 0.002 | 0.002 | 0.002 |
| (Z)-Geranyl acetone* (45)     | 37.3713     | 1.9346    | 301026  | 297814 | 334314 | 369735 | 0.030            | 0.030 | 0.034 | 0.037 |
| (461)                         | 37.3879     | 1.6822    | 32227   | 30929  | 30180  | 29867  | 0.003            | 0.003 | 0.003 | 0.003 |
| 536 (202)                     | 37.4713     | 1.1308    | 247242  | 191862 | 128086 | 141327 | 0.024            | 0.019 | 0.013 | 0.014 |

| Compound Name                 | RT 1D (min) | RT 2D (s) | Volume |        |        |        | Percent Response |       |       |       |
|-------------------------------|-------------|-----------|--------|--------|--------|--------|------------------|-------|-------|-------|
|                               |             |           | HM_1   | HM_2   | LM_1   | LM_2   | HM_1             | HM_2  | LM_1  | LM_2  |
| Vanillin (1100)               | 37.5046     | 2.3925    | 8323   | 7988   | 7337   | 8233   | 0.001            | 0.001 | 0.001 | 0.001 |
| (1366)                        | 37.5713     | 2.8785    | 15996  | 14626  | 14194  | 13475  | 0.002            | 0.001 | 0.001 | 0.001 |
| (1757)                        | 37.6046     | 0.5140    | 8647   | 7791   | 7081   | 7746   | 0.001            | 0.001 | 0.001 | 0.001 |
| (496)                         | 37.6213     | 1.3925    | 37098  | 35755  | 25524  | 27531  | 0.004            | 0.004 | 0.003 | 0.003 |
| 537 (60)                      | 37.6879     | 1.0841    | 603146 | 471453 | 343195 | 423263 | 0.060            | 0.047 | 0.035 | 0.043 |
| (1007)                        | 37.7046     | 2.1402    | 21678  | 20659  | 18340  | 20167  | 0.002            | 0.002 | 0.002 | 0.002 |
| (1662)                        | 37.7379     | 3.7664    | 11192  | 10889  | 10274  | 11261  | 0.001            | 0.001 | 0.001 | 0.001 |
| (802)                         | 37.7713     | 1.5234    | 26433  | 23593  | 14777  | 15525  | 0.003            | 0.002 | 0.002 | 0.002 |
| (1779)                        | 37.7713     | 3.3084    | 6831   | 6225   | 5103   | 5433   | 0.001            | 0.001 | 0.001 | 0.001 |
| (954)                         | 37.9713     | 1.7570    | 9063   | 8455   | 7191   | 8154   | 0.001            | 0.001 | 0.001 | 0.001 |
| (196)                         | 38.0046     | 1.1215    | 280731 | 217556 | 132162 | 158574 | 0.028            | 0.022 | 0.013 | 0.016 |
| (411)                         | 38.0046     | 1.4860    | 75157  | 70488  | 52408  | 54781  | 0.007            | 0.007 | 0.005 | 0.006 |
| (986)                         | 38.0879     | 3.3084    | 23552  | 20984  | 18592  | 23846  | 0.002            | 0.002 | 0.002 | 0.002 |
| (1675)                        | 38.1213     | 3.0654    | 10753  | 11240  | 9639   | 10459  | 0.001            | 0.001 | 0.001 | 0.001 |
| (1689)                        | 38.1546     | 2.9065    | 7140   | 6101   | 5840   | 7028   | 0.001            | 0.001 | 0.001 | 0.001 |
| Dodecanol (167)               | 38.1713     | 1.8598    | 65440  | 57579  | 43172  | 84372  | 0.006            | 0.006 | 0.004 | 0.009 |
| (469)                         | 38.1713     | 2.1402    | 21875  | 20030  | 17602  | 22090  | 0.002            | 0.002 | 0.002 | 0.002 |
| (543)                         | 38.1879     | 2.4206    | 41977  | 39821  | 32123  | 42957  | 0.004            | 0.004 | 0.003 | 0.004 |
| (1714)                        | 38.2713     | 0.4579    | 7834   | 6549   | 6412   | 6710   | 0.001            | 0.001 | 0.001 | 0.001 |
| (1725)                        | 38.2713     | 0.3084    | 5605   | 4900   | 4832   | 5455   | 0.001            | 0.000 | 0.000 | 0.001 |
| (818)                         | 38.3713     | 1.4393    | 28628  | 25604  | 18762  | 21391  | 0.003            | 0.003 | 0.002 | 0.002 |
| (214)                         | 38.4046     | 1.1215    | 272709 | 222037 | 134900 | 163918 | 0.027            | 0.022 | 0.014 | 0.017 |
| (688)                         | 38.4213     | 1.8785    | 20069  | 20212  | 17144  | 27719  | 0.002            | 0.002 | 0.002 | 0.003 |
| (1715)                        | 38.4379     | 0.2710    | 6619   | 5564   | 5147   | 7038   | 0.001            | 0.001 | 0.001 | 0.001 |
| (1601)                        | 38.5379     | 3.4766    | 14227  | 12734  | 11637  | 14225  | 0.001            | 0.001 | 0.001 | 0.001 |
| (1256)                        | 38.6213     | 1.7477    | 8531   | 7653   | 6675   | 8060   | 0.001            | 0.001 | 0.001 | 0.001 |
| (1737)                        | 38.6213     | 3.2243    | 4333   | 4815   | 4235   | 4532   | 0.000            | 0.000 | 0.000 | 0.000 |
| (636)                         | 38.6379     | 1.4206    | 27757  | 24579  | 15381  | 17202  | 0.003            | 0.002 | 0.002 | 0.002 |
| (179)                         | 38.6879     | 1.1589    | 186065 | 146288 | 98529  | 109548 | 0.018            | 0.015 | 0.010 | 0.011 |
| (399)                         | 38.6879     | 2.0561    | 33130  | 30340  | 27416  | 29677  | 0.003            | 0.003 | 0.003 | 0.003 |
| (936)                         | 38.7046     | 2.9813    | 18740  | 17937  | 19158  | 20876  | 0.002            | 0.002 | 0.002 | 0.002 |
| (1177)                        | 38.7713     | 2.2804    | 12164  | 12420  | 10938  | 11503  | 0.001            | 0.001 | 0.001 | 0.001 |
| 538 (74)                      | 38.9046     | 1.1589    | 550252 | 435618 | 277533 | 342975 | 0.054            | 0.044 | 0.028 | 0.035 |
| (499)                         | 38.9046     | 1.4673    | 33285  | 31332  | 20622  | 27681  | 0.003            | 0.003 | 0.002 | 0.003 |
| (921)                         | 38.9046     | 1.7757    | 16136  | 14475  | 12571  | 14936  | 0.002            | 0.001 | 0.001 | 0.002 |
| $\beta$ -Ionone* (64)         | 38.9213     | 2.2056    | 332592 | 314968 | 264273 | 276747 | 0.033            | 0.032 | 0.027 | 0.028 |
| $\beta$ -Ionone epoxide (125) | 38.9213     | 2.5047    | 149103 | 134837 | 141514 | 151382 | 0.015            | 0.013 | 0.014 | 0.015 |
| (1592)                        | 38.9213     | 3.1589    | 8668   | 8891   | 6981   | 7215   | 0.001            | 0.001 | 0.001 | 0.001 |
| Jasmine lactone* (1720)       | 39.0213     | 3.6168    | 11558  | 10073  | 9795   | 9360   | 0.001            | 0.001 | 0.001 | 0.001 |
| (1023)                        | 39.0879     | 3.1402    | 12461  | 11225  | 9834   | 12904  | 0.001            | 0.001 | 0.001 | 0.001 |
| (438)                         | 39.1046     | 1.8131    | 47586  | 46082  | 36942  | 44914  | 0.005            | 0.005 | 0.004 | 0.005 |



| Compound Name                     | RT 1D (min) | RT 2D (s) | Volume |        |        |        | Percent Response |       |       |       |
|-----------------------------------|-------------|-----------|--------|--------|--------|--------|------------------|-------|-------|-------|
|                                   |             |           | HM_1   | HM_2   | LM_1   | LM_2   | HM_1             | HM_2  | LM_1  | LM_2  |
| (1670)                            | 39.2046     | 3.5794    | 12582  | 10845  | 8093   | 7916   | 0.001            | 0.001 | 0.001 | 0.001 |
| Pentadecane (99)                  | 39.2213     | 1.0935    | 556208 | 470533 | 274347 | 347647 | 0.055            | 0.047 | 0.028 | 0.035 |
| (136)                             | 39.2379     | 0.9065    | 66198  | 60939  | 51008  | 95361  | 0.007            | 0.006 | 0.005 | 0.010 |
| (1231)                            | 39.2713     | 2.0467    | 14733  | 14268  | 12743  | 14571  | 0.001            | 0.001 | 0.001 | 0.001 |
| (867)                             | 39.3046     | 2.9346    | 20338  | 21326  | 21938  | 24385  | 0.002            | 0.002 | 0.002 | 0.002 |
| (234)                             | 39.5046     | 1.1402    | 97700  | 78395  | 51089  | 59867  | 0.010            | 0.008 | 0.005 | 0.006 |
| (1552)                            | 39.5046     | 2.2523    | 8190   | 6829   | 5760   | 6387   | 0.001            | 0.001 | 0.001 | 0.001 |
| (E,E)- $\alpha$ -Farnesene* (547) | 39.6213     | 1.3832    | 71927  | 68035  | 33787  | 35827  | 0.007            | 0.007 | 0.003 | 0.004 |
| (208)                             | 39.6546     | 1.1308    | 214016 | 176061 | 99983  | 125264 | 0.021            | 0.018 | 0.010 | 0.013 |
| (505)                             | 39.7046     | 1.7944    | 55055  | 31640  | 28329  | 32493  | 0.005            | 0.003 | 0.003 | 0.003 |
| (1311)                            | 39.7213     | 2.0280    | 20572  | 19112  | 16437  | 15895  | 0.002            | 0.002 | 0.002 | 0.002 |
| 2,4-Di-tert-butylphenol (918)     | 39.8213     | 2.4206    | 22760  | 19610  | 14326  | 15221  | 0.002            | 0.002 | 0.001 | 0.002 |
| (279)                             | 39.8546     | 1.1308    | 174300 | 134610 | 80657  | 99122  | 0.017            | 0.013 | 0.008 | 0.010 |
| (1116)                            | 39.9379     | 2.3738    | 11270  | 10370  | 10788  | 11550  | 0.001            | 0.001 | 0.001 | 0.001 |
| (1242)                            | 39.9713     | 2.7850    | 12921  | 11331  | 11539  | 12108  | 0.001            | 0.001 | 0.001 | 0.001 |
| (1266)                            | 39.9713     | 2.0187    | 7277   | 7144   | 5857   | 6492   | 0.001            | 0.001 | 0.001 | 0.001 |
| Butylated hydroxytoluene (168)    | 39.9879     | 1.7196    | 92916  | 82654  | 78058  | 87873  | 0.009            | 0.008 | 0.008 | 0.009 |
| (1229)                            | 40.0213     | 2.2243    | 25982  | 22917  | 22694  | 24781  | 0.003            | 0.002 | 0.002 | 0.002 |
| (284)                             | 40.1379     | 1.1589    | 133838 | 105016 | 68934  | 78935  | 0.013            | 0.011 | 0.007 | 0.008 |
| (1594)                            | 40.1546     | 2.8598    | 10440  | 9509   | 8905   | 9918   | 0.001            | 0.001 | 0.001 | 0.001 |
| (529)                             | 40.2213     | 1.4579    | 55372  | 49778  | 31779  | 38423  | 0.005            | 0.005 | 0.003 | 0.004 |
| (337)                             | 40.2379     | 3.2897    | 46354  | 39072  | 44719  | 47240  | 0.005            | 0.004 | 0.005 | 0.005 |
| (1373)                            | 40.2879     | 1.8598    | 12508  | 11544  | 10130  | 11159  | 0.001            | 0.001 | 0.001 | 0.001 |
| (1371)                            | 40.3046     | 2.0467    | 10533  | 10047  | 9471   | 10627  | 0.001            | 0.001 | 0.001 | 0.001 |
| (250)                             | 40.4713     | 1.1215    | 213029 | 171768 | 110970 | 133668 | 0.021            | 0.017 | 0.011 | 0.013 |
| Butyl methyl phthalate (65)       | 40.5046     | 2.8131    | 412111 | 384681 | 378462 | 369977 | 0.041            | 0.039 | 0.039 | 0.037 |
| $\delta$ -Cadinene (515)          | 40.5046     | 1.4112    | 53111  | 51986  | 23528  | 26294  | 0.005            | 0.005 | 0.002 | 0.003 |
| (1457)                            | 40.5213     | 3.6075    | 6182   | 6199   | 4940   | 5444   | 0.001            | 0.001 | 0.001 | 0.001 |
| (1529)                            | 40.5213     | 3.7383    | 11563  | 11898  | 10394  | 11233  | 0.001            | 0.001 | 0.001 | 0.001 |
| (1692)                            | 40.5213     | 2.4860    | 9816   | 8903   | 8259   | 9410   | 0.001            | 0.001 | 0.001 | 0.001 |
| (Z)-Calamenene (623)              | 40.5546     | 1.5981    | 30778  | 33155  | 21351  | 23619  | 0.003            | 0.003 | 0.002 | 0.002 |
| (1239)                            | 40.5713     | 2.0561    | 12828  | 11439  | 11354  | 12068  | 0.001            | 0.001 | 0.001 | 0.001 |
| (1724)                            | 40.5713     | 0.4393    | 6916   | 6822   | 5573   | 6605   | 0.001            | 0.001 | 0.001 | 0.001 |
| (626)                             | 40.6213     | 1.7757    | 14921  | 13780  | 11103  | 16430  | 0.001            | 0.001 | 0.001 | 0.002 |
| (1344)                            | 40.6213     | 2.2523    | 9268   | 9518   | 8499   | 10279  | 0.001            | 0.001 | 0.001 | 0.001 |
| (215)                             | 40.7046     | 1.1402    | 168332 | 134750 | 84219  | 107755 | 0.017            | 0.013 | 0.009 | 0.011 |
| (1107)                            | 40.7879     | 2.0654    | 13272  | 12884  | 13549  | 13081  | 0.001            | 0.001 | 0.001 | 0.001 |
| (1584)                            | 40.8046     | 2.7009    | 9462   | 9335   | 8528   | 9543   | 0.001            | 0.001 | 0.001 | 0.001 |
| (245)                             | 40.9546     | 1.1963    | 167509 | 137167 | 97371  | 123403 | 0.017            | 0.014 | 0.010 | 0.012 |
| (1764)                            | 40.9546     | 3.1308    | 4697   | 4694   | 4763   | 4983   | 0.000            | 0.000 | 0.000 | 0.001 |
| Dihydroactinidiolide (135)        | 40.9713     | 0.0374    | 101491 | 99508  | 79551  | 108898 | 0.010            | 0.010 | 0.008 | 0.011 |

| Compound Name                    | RT 1D (min) | RT 2D (s) | Volume |        |        |        | Percent Response |       |       |       |
|----------------------------------|-------------|-----------|--------|--------|--------|--------|------------------|-------|-------|-------|
|                                  |             |           | HM_1   | HM_2   | LM_1   | LM_2   | HM_1             | HM_2  | LM_1  | LM_2  |
| (1064)                           | 40.9713     | 1.6729    | 16602  | 16879  | 13472  | 14705  | 0.002            | 0.002 | 0.001 | 0.001 |
| (1398)                           | 40.9713     | 0.6449    | 11018  | 11197  | 10904  | 12106  | 0.001            | 0.001 | 0.001 | 0.001 |
| (1499)                           | 40.9713     | 0.8224    | 6715   | 6756   | 6258   | 6557   | 0.001            | 0.001 | 0.001 | 0.001 |
| (201)                            | 41.0879     | 1.1215    | 127213 | 97083  | 63930  | 76777  | 0.013            | 0.010 | 0.007 | 0.008 |
| (1518)                           | 41.0879     | 2.4299    | 14631  | 14246  | 15508  | 13242  | 0.001            | 0.001 | 0.002 | 0.001 |
| (1745)                           | 41.2546     | 0.8037    | 6309   | 5479   | 5026   | 5743   | 0.001            | 0.001 | 0.001 | 0.001 |
| 540 (112)                        | 41.2713     | 1.1402    | 356454 | 270705 | 186404 | 218073 | 0.035            | 0.027 | 0.019 | 0.022 |
| (1219)                           | 41.3046     | 2.0841    | 8466   | 8218   | 8364   | 7719   | 0.001            | 0.001 | 0.001 | 0.001 |
| (1761)                           | 41.3213     | 0.5140    | 9296   | 7873   | 7824   | 7598   | 0.001            | 0.001 | 0.001 | 0.001 |
| (844)                            | 41.3713     | 1.6729    | 29510  | 27585  | 19401  | 19117  | 0.003            | 0.003 | 0.002 | 0.002 |
| (1005)                           | 41.3713     | 2.8598    | 21508  | 19327  | 18050  | 20737  | 0.002            | 0.002 | 0.002 | 0.002 |
| Nonylcyclohexane (67)            | 41.4213     | 1.2336    | 433009 | 365255 | 218271 | 288097 | 0.043            | 0.037 | 0.022 | 0.029 |
| (1679)                           | 41.4379     | 2.3458    | 6232   | 5649   | 8364   | 5506   | 0.001            | 0.001 | 0.001 | 0.001 |
| (1733)                           | 41.4379     | 2.5888    | 8274   | 6828   | 6989   | 7136   | 0.001            | 0.001 | 0.001 | 0.001 |
| (1069)                           | 41.5546     | 1.9159    | 36850  | 28275  | 27806  | 24803  | 0.004            | 0.003 | 0.003 | 0.002 |
| (1211)                           | 41.6046     | 2.1495    | 12541  | 9831   | 13447  | 10383  | 0.001            | 0.001 | 0.001 | 0.001 |
| (1412)                           | 41.6879     | 1.6449    | 9618   | 8442   | 6991   | 7005   | 0.001            | 0.001 | 0.001 | 0.001 |
| (1490)                           | 41.7046     | 3.4393    | 17242  | 16172  | 18338  | 16121  | 0.002            | 0.002 | 0.002 | 0.002 |
| (294)                            | 41.8379     | 1.1402    | 182640 | 145460 | 90927  | 109134 | 0.018            | 0.015 | 0.009 | 0.011 |
| (1133)                           | 41.8546     | 2.0561    | 22789  | 19727  | 14137  | 12141  | 0.002            | 0.002 | 0.001 | 0.001 |
| (E)-Nerolidol* (907)             | 41.9046     | 1.7570    | 37105  | 36741  | 21889  | 22005  | 0.004            | 0.004 | 0.002 | 0.002 |
| (619)                            | 41.9379     | 1.4299    | 24771  | 25552  | 15492  | 18537  | 0.002            | 0.003 | 0.002 | 0.002 |
| Dodecanoic acid (796)            | 41.9546     | 2.4206    | 39765  | 26165  | 25965  | 19159  | 0.004            | 0.003 | 0.003 | 0.002 |
| (1626)                           | 41.9713     | 2.6542    | 8934   | 8577   | 7592   | 8082   | 0.001            | 0.001 | 0.001 | 0.001 |
| (569)                            | 42.0546     | 2.1028    | 29694  | 26581  | 28213  | 23158  | 0.003            | 0.003 | 0.003 | 0.002 |
| (122)                            | 42.0713     | 1.1215    | 273090 | 215813 | 137005 | 164341 | 0.027            | 0.022 | 0.014 | 0.017 |
| (1125)                           | 42.1379     | 2.9065    | 22357  | 18278  | 41425  | 16246  | 0.002            | 0.002 | 0.004 | 0.002 |
| (1067)                           | 42.2213     | 1.5140    | 13618  | 14845  | 8596   | 9878   | 0.001            | 0.001 | 0.001 | 0.001 |
| (376)                            | 42.2379     | 1.1682    | 61001  | 46852  | 29302  | 36891  | 0.006            | 0.005 | 0.003 | 0.004 |
| 2,3,6-Trimethylnaphthalene (386) | 42.2546     | 2.0748    | 64012  | 55287  | 50872  | 48454  | 0.006            | 0.006 | 0.005 | 0.005 |
| (570)                            | 42.2546     | 1.8131    | 26012  | 22957  | 15646  | 25562  | 0.003            | 0.002 | 0.002 | 0.003 |
| (943)                            | 42.4713     | 2.0187    | 8527   | 8062   | 8905   | 8571   | 0.001            | 0.001 | 0.001 | 0.001 |
| (1079)                           | 42.4879     | 0.8598    | 15338  | 14508  | 11581  | 14468  | 0.002            | 0.001 | 0.001 | 0.001 |
| (278)                            | 42.5046     | 1.1776    | 115569 | 87320  | 55999  | 70163  | 0.011            | 0.009 | 0.006 | 0.007 |
| (385)                            | 42.5046     | 1.3832    | 64759  | 58682  | 37828  | 43555  | 0.006            | 0.006 | 0.004 | 0.004 |
| (1225)                           | 42.5546     | 1.9533    | 12802  | 11063  | 12549  | 9494   | 0.001            | 0.001 | 0.001 | 0.001 |
| (155)                            | 42.7046     | 1.2710    | 211780 | 171436 | 110840 | 135376 | 0.021            | 0.017 | 0.011 | 0.014 |
| 452 (244)                        | 42.8213     | 2.1028    | 163155 | 114510 | 131234 | 91884  | 0.016            | 0.011 | 0.013 | 0.009 |
| (1580)                           | 42.8379     | 2.7009    | 10294  | 8089   | 17659  | 6700   | 0.001            | 0.001 | 0.002 | 0.001 |
| (1536)                           | 42.8879     | 3.7850    | 12660  | 10929  | 9976   | 10270  | 0.001            | 0.001 | 0.001 | 0.001 |
| (249)                            | 42.9546     | 1.1589    | 186971 | 143842 | 115172 | 108589 | 0.018            | 0.014 | 0.012 | 0.011 |

| Compound Name                                                             | RT 1D (min) | RT 2D (s) | Volume    |           |           |           | Percent Response |        |        |        |
|---------------------------------------------------------------------------|-------------|-----------|-----------|-----------|-----------|-----------|------------------|--------|--------|--------|
|                                                                           |             |           | HM_1      | HM_2      | LM_1      | LM_2      | HM_1             | HM_2   | LM_1   | LM_2   |
| (1471)                                                                    | 43.0046     | 1.7477    | 17326     | 14676     | 15229     | 12420     | 0.002            | 0.001  | 0.002  | 0.001  |
| Caryophyllene oxide (526)                                                 | 43.0879     | 2.1121    | 52876     | 44914     | 22958     | 24711     | 0.005            | 0.004  | 0.002  | 0.002  |
| (1142)                                                                    | 43.1213     | 0.4860    | 24837     | 15837     | 25652     | 14949     | 0.002            | 0.002  | 0.003  | 0.002  |
| Hexadecane (113)                                                          | 43.2879     | 1.1121    | 338869    | 289848    | 191749    | 205812    | 0.033            | 0.029  | 0.020  | 0.021  |
| 2,2,4-Trimethyl-1,3-pentanediol diisobutyrate (104)                       | 43.4213     | 1.8505    | 320215    | 276871    | 214060    | 254070    | 0.032            | 0.028  | 0.022  | 0.026  |
| (881)                                                                     | 43.4213     | 2.4206    | 20444     | 9410      | 6779      | 6083      | 0.002            | 0.001  | 0.001  | 0.001  |
| (101)                                                                     | 43.4713     | 1.1589    | 561357    | 461799    | 354578    | 393252    | 0.055            | 0.046  | 0.036  | 0.040  |
| (327)                                                                     | 43.4879     | 1.4486    | 48424     | 41449     | 33015     | 33064     | 0.005            | 0.004  | 0.003  | 0.003  |
| (216)                                                                     | 43.6046     | 0.8131    | 170205    | 155785    | 148086    | 137556    | 0.017            | 0.016  | 0.015  | 0.014  |
| (2)                                                                       | 43.6879     | 3.3178    | 478641787 | 491641187 | 529876556 | 472084561 | 47.255           | 49.223 | 53.955 | 47.583 |
| Ethylpentyl phtalate (4)                                                  | 43.8046     | 3.1308    | 218954294 | 214169234 | 218397475 | 249036793 | 21.617           | 21.443 | 22.239 | 25.101 |
| (1)                                                                       | 43.8213     | 3.2804    | 77602531  | 77596054  | 68130443  | 77640404  | 7.661            | 7.769  | 6.937  | 7.826  |
| (2,4,4-Trimethyl-3-(2-methylpropanoyloxy)pentyl) 2-methylpropanoate (181) | 43.8546     | 1.5794    | 123281    | 82718     | 73437     | 64015     | 0.012            | 0.008  | 0.007  | 0.006  |
| (133)                                                                     | 43.8546     | 1.4486    | 544414    | 391581    | 305957    | 346252    | 0.054            | 0.039  | 0.031  | 0.035  |
| (3)                                                                       | 43.8713     | 0.0374    | 3805671   | 3407198   | 3231418   | 3340558   | 0.376            | 0.341  | 0.329  | 0.337  |
| (248)                                                                     | 43.8713     | 2.1869    | 189669    | 122520    | 108604    | 91154     | 0.019            | 0.012  | 0.011  | 0.009  |
| (115)                                                                     | 43.8879     | 1.1215    | 855381    | 626384    | 511998    | 570981    | 0.084            | 0.063  | 0.052  | 0.058  |
| (251)                                                                     | 43.8879     | 2.2897    | 104423    | 54343     | 60839     | 50142     | 0.010            | 0.005  | 0.006  | 0.005  |
| (130)                                                                     | 43.9046     | 1.7383    | 524677    | 349571    | 290441    | 315402    | 0.052            | 0.035  | 0.030  | 0.032  |
| (211)                                                                     | 43.9046     | 2.0280    | 196389    | 115949    | 110061    | 117906    | 0.019            | 0.012  | 0.011  | 0.012  |
| (735)                                                                     | 44.1546     | 3.7757    | 39436     | 35110     | 34197     | 34647     | 0.004            | 0.004  | 0.003  | 0.003  |
| (635)                                                                     | 44.1879     | 1.7850    | 26878     | 21105     | 17834     | 22136     | 0.003            | 0.002  | 0.002  | 0.002  |
| (658)                                                                     | 44.1879     | 1.9626    | 36091     | 30871     | 23115     | 26043     | 0.004            | 0.003  | 0.002  | 0.003  |
| (689)                                                                     | 44.1879     | 0.7383    | 45505     | 37479     | 33533     | 37811     | 0.004            | 0.004  | 0.003  | 0.004  |
| (727)                                                                     | 44.1879     | 2.1215    | 29031     | 25307     | 22616     | 24229     | 0.003            | 0.003  | 0.002  | 0.002  |
| (621)                                                                     | 44.2046     | 0.0467    | 19797     | 14342     | 14872     | 17336     | 0.002            | 0.001  | 0.002  | 0.002  |
| (612)                                                                     | 44.2046     | 3.2617    | 77648     | 67138     | 65271     | 71434     | 0.008            | 0.007  | 0.007  | 0.007  |
| (668)                                                                     | 44.2379     | 0.5234    | 24910     | 20893     | 18870     | 23124     | 0.002            | 0.002  | 0.002  | 0.002  |
| (614)                                                                     | 44.2713     | 2.8972    | 22811     | 22361     | 20398     | 22354     | 0.002            | 0.002  | 0.002  | 0.002  |
| (771)                                                                     | 44.2879     | 3.6168    | 31263     | 29073     | 28001     | 30564     | 0.003            | 0.003  | 0.003  | 0.003  |
| (397)                                                                     | 44.3046     | 1.4673    | 80477     | 67043     | 54559     | 70569     | 0.008            | 0.007  | 0.006  | 0.007  |
| (880)                                                                     | 44.3546     | 0.3084    | 37929     | 36486     | 33053     | 36056     | 0.004            | 0.004  | 0.003  | 0.004  |
| (325)                                                                     | 44.3713     | 1.1589    | 126302    | 104642    | 75683     | 89536     | 0.012            | 0.010  | 0.008  | 0.009  |
| (959)                                                                     | 44.4379     | 0.8411    | 18094     | 16618     | 15226     | 15885     | 0.002            | 0.002  | 0.002  | 0.002  |
| (983)                                                                     | 44.5213     | 0.2056    | 12686     | 13172     | 12490     | 12692     | 0.001            | 0.001  | 0.001  | 0.001  |
| (1038)                                                                    | 44.5213     | 3.8318    | 11516     | 12458     | 10245     | 11010     | 0.001            | 0.001  | 0.001  | 0.001  |
| (126)                                                                     | 44.5546     | 2.5701    | 208932    | 209886    | 207699    | 213023    | 0.021            | 0.021  | 0.021  | 0.021  |
| (661)                                                                     | 44.5879     | 1.6822    | 20894     | 20780     | 18725     | 20296     | 0.002            | 0.002  | 0.002  | 0.002  |
| (371)                                                                     | 44.6046     | 1.1308    | 83199     | 66835     | 50456     | 56330     | 0.008            | 0.007  | 0.005  | 0.006  |
| (967)                                                                     | 44.6046     | 0.5047    | 20985     | 19657     | 18323     | 18219     | 0.002            | 0.002  | 0.002  | 0.002  |
| (377)                                                                     | 44.6213     | 1.3738    | 37693     | 36411     | 31769     | 31619     | 0.004            | 0.004  | 0.003  | 0.003  |

| Compound Name                    | RT 1D (min) | RT 2D (s) | Volume |        |        |        | Percent Response |       |       |       |
|----------------------------------|-------------|-----------|--------|--------|--------|--------|------------------|-------|-------|-------|
|                                  |             |           | HM_1   | HM_2   | LM_1   | LM_2   | HM_1             | HM_2  | LM_1  | LM_2  |
| (195)                            | 44.6546     | 2.2804    | 67963  | 71545  | 77161  | 76374  | 0.007            | 0.007 | 0.008 | 0.008 |
| (1076)                           | 44.7379     | 0.1963    | 12710  | 11853  | 10971  | 11884  | 0.001            | 0.001 | 0.001 | 0.001 |
| (225)                            | 44.7546     | 2.2336    | 221585 | 225272 | 223219 | 231820 | 0.022            | 0.023 | 0.023 | 0.023 |
| (261)                            | 44.7546     | 1.3832    | 51215  | 53076  | 43926  | 52594  | 0.005            | 0.005 | 0.004 | 0.005 |
| (684)                            | 44.8213     | 2.6168    | 20783  | 21944  | 18286  | 21563  | 0.002            | 0.002 | 0.002 | 0.002 |
| (1010)                           | 44.8213     | 1.8972    | 22014  | 20834  | 15268  | 15661  | 0.002            | 0.002 | 0.002 | 0.002 |
| (1162)                           | 44.8213     | 3.8411    | 9864   | 9935   | 9291   | 10712  | 0.001            | 0.001 | 0.001 | 0.001 |
| (439)                            | 44.8546     | 1.1589    | 65299  | 51587  | 38678  | 42307  | 0.006            | 0.005 | 0.004 | 0.004 |
| (1110)                           | 44.8546     | 0.0654    | 8626   | 7280   | 7108   | 8423   | 0.001            | 0.001 | 0.001 | 0.001 |
| (1050)                           | 44.8879     | 1.6262    | 16057  | 13314  | 11618  | 12187  | 0.002            | 0.001 | 0.001 | 0.001 |
| (445)                            | 44.9546     | 1.1215    | 50474  | 41562  | 24991  | 30974  | 0.005            | 0.004 | 0.003 | 0.003 |
| (1264)                           | 44.9546     | 0.7944    | 10087  | 9498   | 10455  | 10570  | 0.001            | 0.001 | 0.001 | 0.001 |
| (1298)                           | 44.9713     | 3.7009    | 13933  | 15780  | 13431  | 13591  | 0.001            | 0.002 | 0.001 | 0.001 |
| (285)                            | 45.0213     | 3.1028    | 63963  | 77299  | 80647  | 68802  | 0.006            | 0.008 | 0.008 | 0.007 |
| (1191)                           | 45.0213     | 3.5421    | 11822  | 10971  | 11718  | 12652  | 0.001            | 0.001 | 0.001 | 0.001 |
| (1220)                           | 45.0546     | 0.1682    | 10214  | 10543  | 10363  | 10065  | 0.001            | 0.001 | 0.001 | 0.001 |
| (378)                            | 45.0879     | 1.1215    | 112120 | 89529  | 41777  | 50384  | 0.011            | 0.009 | 0.004 | 0.005 |
| (352)                            | 45.1046     | 1.3925    | 62994  | 59023  | 46207  | 51736  | 0.006            | 0.006 | 0.005 | 0.005 |
| (1376)                           | 45.1213     | 0.8131    | 8021   | 7218   | 7506   | 8031   | 0.001            | 0.001 | 0.001 | 0.001 |
| (1332)                           | 45.1879     | 0.2336    | 12690  | 12201  | 11576  | 12754  | 0.001            | 0.001 | 0.001 | 0.001 |
| (274)                            | 45.2713     | 2.1121    | 81707  | 87186  | 74220  | 80671  | 0.008            | 0.009 | 0.008 | 0.008 |
| (256)                            | 45.2879     | 1.1869    | 82900  | 68019  | 47066  | 51366  | 0.008            | 0.007 | 0.005 | 0.005 |
| (686)                            | 45.3046     | 1.9720    | 46364  | 49909  | 26602  | 19916  | 0.005            | 0.005 | 0.003 | 0.002 |
| (1424)                           | 45.3046     | 0.8879    | 8097   | 6742   | 7455   | 7646   | 0.001            | 0.001 | 0.001 | 0.001 |
| (1379)                           | 45.3546     | 3.9533    | 3431   | 2667   | 2746   | 3309   | 0.000            | 0.000 | 0.000 | 0.000 |
| (310)                            | 45.3879     | 2.0935    | 58653  | 64963  | 52863  | 56489  | 0.006            | 0.007 | 0.005 | 0.006 |
| 543 (109)                        | 45.4213     | 1.2243    | 245383 | 205053 | 133092 | 150936 | 0.024            | 0.021 | 0.014 | 0.015 |
| (1172)                           | 45.4713     | 3.6168    | 9507   | 9124   | 8208   | 9639   | 0.001            | 0.001 | 0.001 | 0.001 |
| (1244)                           | 45.4713     | 3.7477    | 12720  | 11717  | 11879  | 12456  | 0.001            | 0.001 | 0.001 | 0.001 |
| (Z)-Methyl dihydrojasmonate (47) | 45.4879     | 2.5327    | 214627 | 173984 | 157286 | 428930 | 0.021            | 0.017 | 0.016 | 0.043 |
| (838)                            | 45.5046     | 3.3832    | 17235  | 16932  | 15086  | 18141  | 0.002            | 0.002 | 0.002 | 0.002 |
| (1339)                           | 45.5213     | 0.2710    | 16546  | 16367  | 16350  | 16973  | 0.002            | 0.002 | 0.002 | 0.002 |
| (1290)                           | 45.5379     | 0.1121    | 6169   | 6699   | 6154   | 6989   | 0.001            | 0.001 | 0.001 | 0.001 |
| (1524)                           | 45.5546     | 0.8598    | 11353  | 10371  | 10651  | 10395  | 0.001            | 0.001 | 0.001 | 0.001 |
| (319)                            | 45.5879     | 2.0467    | 67634  | 69979  | 64489  | 65220  | 0.007            | 0.007 | 0.007 | 0.007 |
| (1143)                           | 45.6546     | 1.7664    | 12835  | 12698  | 10300  | 13007  | 0.001            | 0.001 | 0.001 | 0.001 |
| (252)                            | 45.6546     | 1.1589    | 172918 | 148935 | 84681  | 127124 | 0.017            | 0.015 | 0.009 | 0.013 |
| (1070)                           | 45.7046     | 2.2897    | 11232  | 11605  | 8918   | 11316  | 0.001            | 0.001 | 0.001 | 0.001 |
| (1190)                           | 45.7379     | 2.6822    | 9206   | 8005   | 7065   | 8230   | 0.001            | 0.001 | 0.001 | 0.001 |
| (1522)                           | 45.7379     | 3.6168    | 9237   | 8501   | 7476   | 8662   | 0.001            | 0.001 | 0.001 | 0.001 |
| 3,4-Diethyl-1,1'-biphenyl (311)  | 45.7546     | 2.0187    | 114351 | 118459 | 86984  | 96034  | 0.011            | 0.012 | 0.009 | 0.010 |

| Compound Name       | RT 1D (min) | RT 2D (s) | Volume |        |        |        | Percent Response |       |       |       |
|---------------------|-------------|-----------|--------|--------|--------|--------|------------------|-------|-------|-------|
|                     |             |           | HM_1   | HM_2   | LM_1   | LM_2   | HM_1             | HM_2  | LM_1  | LM_2  |
| (1390)              | 45.7713     | 3.0093    | 12168  | 10995  | 9336   | 11457  | 0.001            | 0.001 | 0.001 | 0.001 |
| (1418)              | 45.7879     | 0.1402    | 8411   | 8554   | 8329   | 8294   | 0.001            | 0.001 | 0.001 | 0.001 |
| (1560)              | 45.7879     | 3.8131    | 10603  | 9612   | 8505   | 8883   | 0.001            | 0.001 | 0.001 | 0.001 |
| (292)               | 45.8879     | 0.9346    | 46729  | 41592  | 34731  | 46903  | 0.005            | 0.004 | 0.004 | 0.005 |
| (359)               | 45.8879     | 1.4206    | 52416  | 46982  | 36144  | 43820  | 0.005            | 0.005 | 0.004 | 0.004 |
| (503)               | 45.8879     | 1.1589    | 60409  | 51368  | 30580  | 37865  | 0.006            | 0.005 | 0.003 | 0.004 |
| (1582)              | 46.0879     | 3.6636    | 14680  | 13962  | 13400  | 13196  | 0.001            | 0.001 | 0.001 | 0.001 |
| (1158)              | 46.1379     | 2.5327    | 11177  | 10822  | 9510   | 10689  | 0.001            | 0.001 | 0.001 | 0.001 |
| (164)               | 46.1546     | 2.0187    | 113157 | 108643 | 108439 | 159629 | 0.011            | 0.011 | 0.011 | 0.016 |
| (322)               | 46.1546     | 1.8318    | 61325  | 53412  | 47788  | 52660  | 0.006            | 0.005 | 0.005 | 0.005 |
| (551)               | 46.1713     | 1.1869    | 75604  | 63088  | 41843  | 47309  | 0.007            | 0.006 | 0.004 | 0.005 |
| (650)               | 46.1713     | 1.5794    | 27370  | 26597  | 21827  | 18089  | 0.003            | 0.003 | 0.002 | 0.002 |
| (1331)              | 46.1713     | 3.0467    | 14973  | 15830  | 14444  | 15014  | 0.001            | 0.002 | 0.001 | 0.002 |
| (1661)              | 46.1713     | 3.9065    | 3952   | 4275   | 4018   | 3864   | 0.000            | 0.000 | 0.000 | 0.000 |
| (1505)              | 46.1879     | 3.5327    | 10345  | 9684   | 8369   | 9514   | 0.001            | 0.001 | 0.001 | 0.001 |
| (480)               | 46.3713     | 2.0748    | 31537  | 31063  | 28501  | 36961  | 0.003            | 0.003 | 0.003 | 0.004 |
| (873)               | 46.3713     | 2.6449    | 15564  | 15339  | 13909  | 15234  | 0.002            | 0.002 | 0.001 | 0.002 |
| (1497)              | 46.4046     | 0.4860    | 13556  | 12875  | 11771  | 11944  | 0.001            | 0.001 | 0.001 | 0.001 |
| (403)               | 46.4213     | 1.8692    | 33259  | 34343  | 32751  | 35039  | 0.003            | 0.003 | 0.003 | 0.004 |
| (908)               | 46.4213     | 2.9065    | 17088  | 18279  | 15537  | 19881  | 0.002            | 0.002 | 0.002 | 0.002 |
| (1058)              | 46.4213     | 3.1215    | 20808  | 19685  | 17592  | 20986  | 0.002            | 0.002 | 0.002 | 0.002 |
| (1658)              | 46.4213     | 3.8037    | 8107   | 9044   | 8656   | 8930   | 0.001            | 0.001 | 0.001 | 0.001 |
| (329)               | 46.5046     | 2.5607    | 44830  | 44039  | 36318  | 64409  | 0.004            | 0.004 | 0.004 | 0.006 |
| (464)               | 46.5046     | 1.1963    | 118922 | 101190 | 73061  | 80229  | 0.012            | 0.010 | 0.007 | 0.008 |
| (1527)              | 46.5213     | 0.8224    | 6463   | 5518   | 5351   | 5765   | 0.001            | 0.001 | 0.001 | 0.001 |
| (1623)              | 46.5213     | 3.5421    | 8680   | 8076   | 7987   | 8031   | 0.001            | 0.001 | 0.001 | 0.001 |
| (1648)              | 46.5546     | 3.9346    | 7037   | 6756   | 6214   | 7229   | 0.001            | 0.001 | 0.001 | 0.001 |
| Bancroftinone (435) | 46.5713     | 1.8505    | 67204  | 64978  | 49833  | 51756  | 0.007            | 0.007 | 0.005 | 0.005 |
| (346)               | 46.7046     | 1.1963    | 104797 | 86355  | 60939  | 68616  | 0.010            | 0.009 | 0.006 | 0.007 |
| (1277)              | 46.7713     | 2.9626    | 23613  | 23135  | 20676  | 26273  | 0.002            | 0.002 | 0.002 | 0.003 |
| (1647)              | 46.7879     | 3.4860    | 11409  | 12877  | 11525  | 12467  | 0.001            | 0.001 | 0.001 | 0.001 |
| (408)               | 46.8213     | 1.7850    | 40329  | 41386  | 31203  | 35896  | 0.004            | 0.004 | 0.003 | 0.004 |
| (1327)              | 46.8379     | 2.3458    | 15463  | 16250  | 14549  | 16546  | 0.002            | 0.002 | 0.001 | 0.002 |
| (336)               | 46.8379     | 1.5888    | 42223  | 38933  | 28600  | 47338  | 0.004            | 0.004 | 0.003 | 0.005 |
| (1237)              | 46.8713     | 2.1682    | 9541   | 10163  | 9545   | 9127   | 0.001            | 0.001 | 0.001 | 0.001 |
| (1672)              | 46.9213     | 0.1495    | 9272   | 8499   | 8198   | 8551   | 0.001            | 0.001 | 0.001 | 0.001 |
| (344)               | 46.9546     | 1.1308    | 84004  | 75032  | 46668  | 55539  | 0.008            | 0.008 | 0.005 | 0.006 |
| (1645)              | 46.9713     | 3.7290    | 6132   | 6577   | 5613   | 5537   | 0.001            | 0.001 | 0.001 | 0.001 |
| (450)               | 46.9879     | 1.7477    | 55649  | 55261  | 49665  | 54979  | 0.005            | 0.006 | 0.005 | 0.006 |
| (1230)              | 47.0213     | 2.1215    | 8908   | 8745   | 8511   | 9658   | 0.001            | 0.001 | 0.001 | 0.001 |
| (1682)              | 47.0379     | 3.5234    | 5646   | 5565   | 5816   | 6205   | 0.001            | 0.001 | 0.001 | 0.001 |

| Compound Name | RT 1D (min) | RT 2D (s) | Volume |       |       |       | Percent Response |       |       |       |
|---------------|-------------|-----------|--------|-------|-------|-------|------------------|-------|-------|-------|
|               |             |           | HM_1   | HM_2  | LM_1  | LM_2  | HM_1             | HM_2  | LM_1  | LM_2  |
| (1680)        | 47.1713     | 0.6729    | 14464  | 12754 | 14479 | 13717 | 0.001            | 0.001 | 0.001 | 0.001 |
| (424)         | 47.1713     | 1.1215    | 116663 | 95952 | 43174 | 56841 | 0.012            | 0.010 | 0.004 | 0.006 |
| (517)         | 47.1879     | 1.7196    | 51309  | 50250 | 43471 | 48763 | 0.005            | 0.005 | 0.004 | 0.005 |
| (483)         | 47.2379     | 1.4579    | 33740  | 29152 | 21914 | 26319 | 0.003            | 0.003 | 0.002 | 0.003 |
| (696)         | 47.2379     | 2.1121    | 25600  | 23419 | 23025 | 28734 | 0.003            | 0.002 | 0.002 | 0.003 |
| (1542)        | 47.2379     | 3.0841    | 7476   | 6549  | 6968  | 7932  | 0.001            | 0.001 | 0.001 | 0.001 |
| (1285)        | 47.2713     | 2.3458    | 10702  | 10618 | 12962 | 11201 | 0.001            | 0.001 | 0.001 | 0.001 |
| (1717)        | 47.2879     | 3.6542    | 6461   | 5295  | 6251  | 6259  | 0.001            | 0.001 | 0.001 | 0.001 |
| (1656)        | 47.3046     | 3.2617    | 8980   | 8032  | 8044  | 8300  | 0.001            | 0.001 | 0.001 | 0.001 |
| (281)         | 47.3879     | 1.1402    | 74006  | 64676 | 37674 | 70098 | 0.007            | 0.006 | 0.004 | 0.007 |
| (1768)        | 47.4879     | 0.9533    | 8226   | 7362  | 7208  | 7077  | 0.001            | 0.001 | 0.001 | 0.001 |
| (1316)        | 47.6046     | 2.2991    | 8128   | 8300  | 11297 | 8639  | 0.001            | 0.001 | 0.001 | 0.001 |
| (562)         | 47.6379     | 1.6355    | 39170  | 35561 | 27255 | 33437 | 0.004            | 0.004 | 0.003 | 0.003 |
| (449)         | 47.6379     | 1.8879    | 59172  | 53221 | 41137 | 52312 | 0.006            | 0.005 | 0.004 | 0.005 |
| (1430)        | 47.6379     | 2.4953    | 6006   | 6534  | 5477  | 6130  | 0.001            | 0.001 | 0.001 | 0.001 |
| (1461)        | 47.6713     | 3.8224    | 10014  | 9272  | 8551  | 9482  | 0.001            | 0.001 | 0.001 | 0.001 |
| (1484)        | 47.6713     | 2.7103    | 17643  | 16121 | 15832 | 17538 | 0.002            | 0.002 | 0.002 | 0.002 |
| (589)         | 47.7713     | 1.2617    | 106143 | 91410 | 54175 | 70058 | 0.010            | 0.009 | 0.006 | 0.007 |
| (591)         | 47.7879     | 1.6075    | 28000  | 23701 | 16701 | 21928 | 0.003            | 0.002 | 0.002 | 0.002 |
| (524)         | 47.8213     | 1.7570    | 35746  | 26674 | 26105 | 26523 | 0.004            | 0.003 | 0.003 | 0.003 |
| (1218)        | 47.8546     | 2.2523    | 15756  | 17464 | 18980 | 16719 | 0.002            | 0.002 | 0.002 | 0.002 |
| (1621)        | 47.8713     | 3.4299    | 15817  | 15119 | 13865 | 15549 | 0.002            | 0.002 | 0.001 | 0.002 |
| (1735)        | 47.9046     | 3.6075    | 10808  | 10516 | 9282  | 10175 | 0.001            | 0.001 | 0.001 | 0.001 |
| (559)         | 47.9713     | 2.5327    | 34909  | 32800 | 29250 | 32280 | 0.003            | 0.003 | 0.003 | 0.003 |
| (624)         | 48.0046     | 1.5607    | 19054  | 19398 | 11857 | 16509 | 0.002            | 0.002 | 0.001 | 0.002 |
| (1539)        | 48.0046     | 2.8318    | 16657  | 15411 | 15190 | 15082 | 0.002            | 0.002 | 0.002 | 0.002 |
| (1565)        | 48.0379     | 3.1963    | 7232   | 7870  | 6510  | 7855  | 0.001            | 0.001 | 0.001 | 0.001 |
| (1213)        | 48.0546     | 1.8505    | 15826  | 15009 | 11206 | 13398 | 0.002            | 0.002 | 0.001 | 0.001 |
| (598)         | 48.0879     | 1.1869    | 32008  | 27473 | 18970 | 24337 | 0.003            | 0.003 | 0.002 | 0.002 |
| (379)         | 48.1713     | 1.3832    | 51786  | 47985 | 34751 | 42711 | 0.005            | 0.005 | 0.004 | 0.004 |
| (575)         | 48.2213     | 1.1776    | 44284  | 38594 | 25288 | 33922 | 0.004            | 0.004 | 0.003 | 0.003 |
| (1296)        | 48.2546     | 2.1869    | 15279  | 16318 | 21112 | 15824 | 0.002            | 0.002 | 0.002 | 0.002 |
| (1775)        | 48.2713     | 3.3551    | 5275   | 5523  | 4700  | 4957  | 0.001            | 0.001 | 0.000 | 0.000 |
| (1236)        | 48.2879     | 1.8224    | 11636  | 11692 | 7984  | 10406 | 0.001            | 0.001 | 0.001 | 0.001 |
| (1716)        | 48.3379     | 3.9346    | 5860   | 5896  | 5258  | 6052  | 0.001            | 0.001 | 0.001 | 0.001 |
| (407)         | 48.3546     | 1.3925    | 61759  | 58906 | 35101 | 53283 | 0.006            | 0.006 | 0.004 | 0.005 |
| (909)         | 48.4213     | 2.5421    | 20382  | 20351 | 18161 | 17046 | 0.002            | 0.002 | 0.002 | 0.002 |
| (1781)        | 48.4213     | 0.4019    | 5659   | 5481  | 4640  | 4910  | 0.001            | 0.001 | 0.000 | 0.000 |
| (706)         | 48.5046     | 1.1776    | 18086  | 17779 | 11050 | 14254 | 0.002            | 0.002 | 0.001 | 0.001 |
| (949)         | 48.5213     | 2.1308    | 24987  | 25926 | 27501 | 25826 | 0.002            | 0.003 | 0.003 | 0.003 |
| (577)         | 48.5879     | 1.1589    | 43824  | 37699 | 24265 | 31912 | 0.004            | 0.004 | 0.002 | 0.003 |

| Compound Name            | RT 1D (min) | RT 2D (s) | Volume |        |       |       | Percent Response |       |       |       |
|--------------------------|-------------|-----------|--------|--------|-------|-------|------------------|-------|-------|-------|
|                          |             |           | HM_1   | HM_2   | LM_1  | LM_2  | HM_1             | HM_2  | LM_1  | LM_2  |
| (1677)                   | 48.6713     | 2.5327    | 7601   | 7439   | 7413  | 7603  | 0.001            | 0.001 | 0.001 | 0.001 |
| (1020)                   | 48.7046     | 2.0935    | 23648  | 22922  | 24501 | 23265 | 0.002            | 0.002 | 0.002 | 0.002 |
| (1551)                   | 48.7046     | 3.3925    | 8834   | 7625   | 7635  | 8083  | 0.001            | 0.001 | 0.001 | 0.001 |
| (501)                    | 48.7713     | 1.4206    | 59533  | 55458  | 36109 | 43332 | 0.006            | 0.006 | 0.004 | 0.004 |
| (1688)                   | 48.8546     | 2.7570    | 9006   | 8995   | 9003  | 8413  | 0.001            | 0.001 | 0.001 | 0.001 |
| (1673)                   | 48.8879     | 0.8318    | 13378  | 12813  | 11384 | 13404 | 0.001            | 0.001 | 0.001 | 0.001 |
| (286)                    | 48.9213     | 1.1589    | 90437  | 75226  | 50346 | 97067 | 0.009            | 0.008 | 0.005 | 0.010 |
| (709)                    | 49.0046     | 2.2991    | 30767  | 26188  | 27687 | 28737 | 0.003            | 0.003 | 0.003 | 0.003 |
| (813)                    | 49.0046     | 1.4206    | 22895  | 21818  | 12417 | 18295 | 0.002            | 0.002 | 0.001 | 0.002 |
| (1353)                   | 49.0213     | 1.8505    | 13685  | 12117  | 9719  | 11329 | 0.001            | 0.001 | 0.001 | 0.001 |
| (1362)                   | 49.0546     | 2.4299    | 12234  | 10458  | 10459 | 10067 | 0.001            | 0.001 | 0.001 | 0.001 |
| (941)                    | 49.1046     | 2.0467    | 9307   | 9623   | 12500 | 10822 | 0.001            | 0.001 | 0.001 | 0.001 |
| (1762)                   | 49.1046     | 2.8318    | 6208   | 5490   | 6525  | 5949  | 0.001            | 0.001 | 0.001 | 0.001 |
| Undecylcyclohexane (339) | 49.2379     | 1.2617    | 112641 | 100229 | 59155 | 83219 | 0.011            | 0.010 | 0.006 | 0.008 |
| (897)                    | 49.2379     | 2.0000    | 16988  | 16312  | 20639 | 18759 | 0.002            | 0.002 | 0.002 | 0.002 |
| (1638)                   | 49.3379     | 2.7850    | 8922   | 8875   | 7762  | 7572  | 0.001            | 0.001 | 0.001 | 0.001 |
| (961)                    | 49.4046     | 1.9720    | 10386  | 9449   | 12373 | 10227 | 0.001            | 0.001 | 0.001 | 0.001 |
| (533)                    | 49.5213     | 1.1589    | 54856  | 47473  | 28978 | 45918 | 0.005            | 0.005 | 0.003 | 0.005 |
| (586)                    | 49.5546     | 1.4299    | 35206  | 29836  | 20364 | 23314 | 0.003            | 0.003 | 0.002 | 0.002 |
| (1746)                   | 49.6046     | 3.0280    | 5374   | 5404   | 5595  | 5329  | 0.001            | 0.001 | 0.001 | 0.001 |
| (1295)                   | 49.6213     | 2.7196    | 8629   | 8939   | 8061  | 8579  | 0.001            | 0.001 | 0.001 | 0.001 |
| (947)                    | 49.6379     | 1.9720    | 25532  | 27830  | 25336 | 27435 | 0.003            | 0.003 | 0.003 | 0.003 |
| (1449)                   | 49.6379     | 2.4673    | 9248   | 9039   | 7665  | 8272  | 0.001            | 0.001 | 0.001 | 0.001 |
| (1701)                   | 49.7379     | 2.9252    | 6786   | 5964   | 5782  | 5916  | 0.001            | 0.001 | 0.001 | 0.001 |
| (1378)                   | 49.8213     | 1.5607    | 9265   | 7549   | 5500  | 6493  | 0.001            | 0.001 | 0.001 | 0.001 |
| (726)                    | 49.8379     | 1.2150    | 57438  | 49239  | 29547 | 46725 | 0.006            | 0.005 | 0.003 | 0.005 |
| (993)                    | 49.8379     | 1.9159    | 29588  | 27087  | 26348 | 24111 | 0.003            | 0.003 | 0.003 | 0.002 |
| (1397)                   | 50.0213     | 2.2056    | 13993  | 12704  | 12213 | 11346 | 0.001            | 0.001 | 0.001 | 0.001 |
| (1422)                   | 50.0379     | 1.5140    | 21021  | 18431  | 11739 | 13883 | 0.002            | 0.002 | 0.001 | 0.001 |
| (1101)                   | 50.0546     | 2.5888    | 20352  | 19268  | 18228 | 16404 | 0.002            | 0.002 | 0.002 | 0.002 |
| (934)                    | 50.0713     | 1.8598    | 16418  | 17008  | 15207 | 14479 | 0.002            | 0.002 | 0.002 | 0.001 |
| (790)                    | 50.1546     | 1.2150    | 49327  | 43593  | 31239 | 36322 | 0.005            | 0.004 | 0.003 | 0.004 |
| (982)                    | 50.2379     | 1.8318    | 16455  | 16359  | 15362 | 15034 | 0.002            | 0.002 | 0.002 | 0.002 |
| (896)                    | 50.4379     | 1.3178    | 24970  | 20615  | 11329 | 15120 | 0.002            | 0.002 | 0.001 | 0.002 |
| (1494)                   | 50.4879     | 1.5701    | 10398  | 9066   | 6903  | 7219  | 0.001            | 0.001 | 0.001 | 0.001 |
| (557)                    | 50.5046     | 1.1589    | 37112  | 32120  | 24209 | 34220 | 0.004            | 0.003 | 0.002 | 0.003 |
| (962)                    | 50.5046     | 1.8037    | 19028  | 18581  | 17425 | 16976 | 0.002            | 0.002 | 0.002 | 0.002 |
| (1742)                   | 50.5379     | 2.5607    | 8003   | 7318   | 7542  | 7709  | 0.001            | 0.001 | 0.001 | 0.001 |
| (603)                    | 50.7213     | 1.1963    | 33375  | 30173  | 16250 | 24963 | 0.003            | 0.003 | 0.002 | 0.003 |
| (1628)                   | 50.7379     | 2.1682    | 7209   | 7302   | 7125  | 7081  | 0.001            | 0.001 | 0.001 | 0.001 |
| (1106)                   | 50.7713     | 1.7664    | 11622  | 11471  | 10321 | 10201 | 0.001            | 0.001 | 0.001 | 0.001 |

| Compound Name  | RT 1D (min) | RT 2D (s) | Volume |        |        |        | Percent Response |       |       |       |
|----------------|-------------|-----------|--------|--------|--------|--------|------------------|-------|-------|-------|
|                |             |           | HM_1   | HM_2   | LM_1   | LM_2   | HM_1             | HM_2  | LM_1  | LM_2  |
| (548)          | 50.8879     | 1.1308    | 35476  | 29089  | 11848  | 24850  | 0.004            | 0.003 | 0.001 | 0.003 |
| (760)          | 50.9213     | 1.5234    | 29183  | 22860  | 13307  | 19902  | 0.003            | 0.002 | 0.001 | 0.002 |
| (1303)         | 50.9879     | 1.9720    | 13816  | 12228  | 10683  | 12867  | 0.001            | 0.001 | 0.001 | 0.001 |
| (1150)         | 51.1046     | 1.2336    | 23041  | 19240  | 13308  | 18842  | 0.002            | 0.002 | 0.001 | 0.002 |
| (997)          | 51.2213     | 1.7103    | 14148  | 13303  | 11387  | 11971  | 0.001            | 0.001 | 0.001 | 0.001 |
| (1346)         | 51.2379     | 1.8785    | 7684   | 7152   | 6940   | 7146   | 0.001            | 0.001 | 0.001 | 0.001 |
| (1198)         | 51.3379     | 1.2243    | 11809  | 10798  | 7404   | 10850  | 0.001            | 0.001 | 0.001 | 0.001 |
| (1776)         | 51.3546     | 0.8692    | 9059   | 7620   | 7476   | 7576   | 0.001            | 0.001 | 0.001 | 0.001 |
| (1511)         | 51.3879     | 2.9439    | 15661  | 13465  | 13333  | 14181  | 0.002            | 0.001 | 0.001 | 0.001 |
| (380)          | 51.4379     | 1.4953    | 39669  | 35246  | 29690  | 39563  | 0.004            | 0.004 | 0.003 | 0.004 |
| (630)          | 51.4379     | 1.7196    | 11729  | 10853  | 8747   | 11742  | 0.001            | 0.001 | 0.001 | 0.001 |
| (1519)         | 51.4546     | 2.4673    | 8310   | 8028   | 8800   | 8826   | 0.001            | 0.001 | 0.001 | 0.001 |
| (1258)         | 51.4713     | 1.9439    | 11554  | 10207  | 12343  | 11524  | 0.001            | 0.001 | 0.001 | 0.001 |
| (1396)         | 51.4713     | 2.0841    | 11066  | 9379   | 11590  | 9985   | 0.001            | 0.001 | 0.001 | 0.001 |
| (656)          | 51.6213     | 1.4112    | 20483  | 17521  | 8471   | 15335  | 0.002            | 0.002 | 0.001 | 0.002 |
| (842)          | 51.6213     | 0.9346    | 18776  | 16305  | 19491  | 18268  | 0.002            | 0.002 | 0.002 | 0.002 |
| (1441)         | 51.6213     | 2.8411    | 8904   | 7981   | 8494   | 8795   | 0.001            | 0.001 | 0.001 | 0.001 |
| (1778)         | 51.6379     | 0.7290    | 7266   | 6707   | 6414   | 7779   | 0.001            | 0.001 | 0.001 | 0.001 |
| (1141)         | 51.6546     | 1.2150    | 12025  | 9704   | 6643   | 10822  | 0.001            | 0.001 | 0.001 | 0.001 |
| (984)          | 51.7213     | 1.6355    | 14374  | 12947  | 12440  | 14122  | 0.001            | 0.001 | 0.001 | 0.001 |
| (1382)         | 51.7213     | 2.1402    | 31864  | 27751  | 30444  | 30702  | 0.003            | 0.003 | 0.003 | 0.003 |
| (1283)         | 51.7546     | 1.1589    | 12777  | 9792   | 8030   | 11329  | 0.001            | 0.001 | 0.001 | 0.001 |
| (1453)         | 51.7546     | 2.7383    | 6403   | 5643   | 5511   | 6530   | 0.001            | 0.001 | 0.001 | 0.001 |
| (1610)         | 51.7546     | 2.5514    | 6281   | 5695   | 5981   | 6421   | 0.001            | 0.001 | 0.001 | 0.001 |
| (1126)         | 51.8379     | 1.4112    | 17889  | 16537  | 8514   | 12555  | 0.002            | 0.002 | 0.001 | 0.001 |
| (930)          | 51.8879     | 1.6075    | 14706  | 14861  | 11847  | 14122  | 0.001            | 0.001 | 0.001 | 0.001 |
| (1270)         | 51.9546     | 1.2336    | 14420  | 14139  | 9414   | 13085  | 0.001            | 0.001 | 0.001 | 0.001 |
| (1193)         | 51.9879     | 2.7009    | 13449  | 12337  | 16972  | 15827  | 0.001            | 0.001 | 0.002 | 0.002 |
| (542)          | 52.1046     | 2.0280    | 23171  | 20084  | 21412  | 30039  | 0.002            | 0.002 | 0.002 | 0.003 |
| (1001)         | 52.1213     | 2.2710    | 11858  | 11031  | 11316  | 13083  | 0.001            | 0.001 | 0.001 | 0.001 |
| (1250)         | 52.1213     | 2.4486    | 10307  | 10782  | 11265  | 12627  | 0.001            | 0.001 | 0.001 | 0.001 |
| (422)          | 52.1546     | 1.7570    | 35781  | 32871  | 30445  | 37299  | 0.004            | 0.003 | 0.003 | 0.004 |
| (1568)         | 52.1546     | 1.0187    | 5405   | 5667   | 5609   | 6466   | 0.001            | 0.001 | 0.001 | 0.001 |
| (1255)         | 52.2213     | 1.2804    | 19304  | 17632  | 11715  | 17346  | 0.002            | 0.002 | 0.001 | 0.002 |
| (929)          | 52.2879     | 1.5701    | 15535  | 16814  | 11881  | 14095  | 0.002            | 0.002 | 0.001 | 0.001 |
| Caffeine (151) | 52.3713     | 3.8224    | 213386 | 180931 | 186469 | 136361 | 0.021            | 0.018 | 0.019 | 0.014 |
| (1053)         | 52.4379     | 0.9065    | 20820  | 19652  | 19974  | 19712  | 0.002            | 0.002 | 0.002 | 0.002 |
| (1129)         | 52.4379     | 0.6729    | 12791  | 12389  | 12927  | 10029  | 0.001            | 0.001 | 0.001 | 0.001 |
| (904)          | 52.4379     | 1.5514    | 31468  | 33145  | 26724  | 29315  | 0.003            | 0.003 | 0.003 | 0.003 |
| (1432)         | 52.4546     | 2.1589    | 6842   | 7483   | 7739   | 6593   | 0.001            | 0.001 | 0.001 | 0.001 |
| (1451)         | 52.4546     | 1.9346    | 9560   | 9660   | 12284  | 9466   | 0.001            | 0.001 | 0.001 | 0.001 |



| Compound Name                     | RT 1D (min) | RT 2D (s) | Volume  |         |        |         | Percent Response |       |       |       |
|-----------------------------------|-------------|-----------|---------|---------|--------|---------|------------------|-------|-------|-------|
|                                   |             |           | HM_1    | HM_2    | LM_1   | LM_2    | HM_1             | HM_2  | LM_1  | LM_2  |
| (981)                             | 52.4713     | 1.2336    | 25043   | 24890   | 17150  | 23262   | 0.002            | 0.002 | 0.002 | 0.002 |
| (1478)                            | 52.4713     | 2.6075    | 9604    | 10137   | 10667  | 10697   | 0.001            | 0.001 | 0.001 | 0.001 |
| (1606)                            | 52.4879     | 3.2991    | 7491    | 7466    | 7403   | 7927    | 0.001            | 0.001 | 0.001 | 0.001 |
| (1676)                            | 52.5213     | 3.0935    | 7251    | 6465    | 7048   | 7236    | 0.001            | 0.001 | 0.001 | 0.001 |
| (1182)                            | 52.6879     | 2.5794    | 13947   | 12166   | 17512  | 13694   | 0.001            | 0.001 | 0.002 | 0.001 |
| (885)                             | 52.7213     | 1.2617    | 36419   | 33789   | 19802  | 29621   | 0.004            | 0.003 | 0.002 | 0.003 |
| (1747)                            | 52.7213     | 0.5607    | 5886    | 5930    | 5411   | 5924    | 0.001            | 0.001 | 0.001 | 0.001 |
| (538)                             | 52.7379     | 1.8972    | 25680   | 23701   | 20302  | 30224   | 0.003            | 0.002 | 0.002 | 0.003 |
| (1113)                            | 52.7546     | 1.5234    | 19864   | 20125   | 15294  | 16431   | 0.002            | 0.002 | 0.002 | 0.002 |
| (1736)                            | 52.7879     | 0.7196    | 8315    | 8488    | 7220   | 8424    | 0.001            | 0.001 | 0.001 | 0.001 |
| (1380)                            | 52.8046     | 2.3084    | 17196   | 12371   | 12517  | 11775   | 0.002            | 0.001 | 0.001 | 0.001 |
| Hept-3-yl isobutyl phthalate (13) | 53.0379     | 2.4953    | 1458242 | 1438545 | 834065 | 1770640 | 0.144            | 0.144 | 0.085 | 0.178 |
| (486)                             | 53.0379     | 3.5607    | 23494   | 23573   | 18537  | 23536   | 0.002            | 0.002 | 0.002 | 0.002 |
| (600)                             | 53.0879     | 1.4953    | 40403   | 39498   | 28416  | 38580   | 0.004            | 0.004 | 0.003 | 0.004 |
| (640)                             | 53.1046     | 0.0561    | 5498    | 5558    | 4653   | 5959    | 0.001            | 0.001 | 0.000 | 0.001 |
| (964)                             | 53.1046     | 0.1682    | 16673   | 16331   | 13638  | 16744   | 0.002            | 0.002 | 0.001 | 0.002 |
| (1287)                            | 53.1046     | 0.6542    | 15365   | 15448   | 13275  | 15478   | 0.002            | 0.002 | 0.001 | 0.002 |
| (1011)                            | 53.1213     | 2.2056    | 16255   | 15638   | 13939  | 14987   | 0.002            | 0.002 | 0.001 | 0.002 |
| (1189)                            | 53.1213     | 0.3925    | 20012   | 19796   | 16644  | 19298   | 0.002            | 0.002 | 0.002 | 0.002 |
| (1310)                            | 53.1213     | 0.9346    | 20421   | 20736   | 17055  | 20476   | 0.002            | 0.002 | 0.002 | 0.002 |
| (1268)                            | 53.1213     | 1.9533    | 8797    | 7351    | 7754   | 7693    | 0.001            | 0.001 | 0.001 | 0.001 |
| (1144)                            | 53.1379     | 1.2617    | 24762   | 21621   | 15809  | 21378   | 0.002            | 0.002 | 0.002 | 0.002 |
| (745)                             | 53.2713     | 1.7757    | 22786   | 16854   | 12999  | 16584   | 0.002            | 0.002 | 0.001 | 0.002 |
| (1480)                            | 53.3379     | 2.1589    | 6982    | 6398    | 7224   | 6513    | 0.001            | 0.001 | 0.001 | 0.001 |
| (1308)                            | 53.3713     | 1.2710    | 9067    | 7993    | 5956   | 8023    | 0.001            | 0.001 | 0.001 | 0.001 |
| (1739)                            | 53.4213     | 3.1308    | 6288    | 5638    | 5883   | 5764    | 0.001            | 0.001 | 0.001 | 0.001 |
| (1669)                            | 53.4713     | 0.9065    | 9793    | 8475    | 9022   | 9667    | 0.001            | 0.001 | 0.001 | 0.001 |
| (1506)                            | 53.4879     | 1.8785    | 6618    | 5626    | 7280   | 6058    | 0.001            | 0.001 | 0.001 | 0.001 |
| (639)                             | 53.5046     | 1.6168    | 31590   | 24942   | 23726  | 24611   | 0.003            | 0.002 | 0.002 | 0.002 |
| (1352)                            | 53.5046     | 1.2710    | 10995   | 8836    | 7683   | 9351    | 0.001            | 0.001 | 0.001 | 0.001 |
| (1598)                            | 53.5213     | 3.4860    | 14283   | 13582   | 12839  | 13553   | 0.001            | 0.001 | 0.001 | 0.001 |
| (1755)                            | 53.5379     | 3.6636    | 8430    | 7662    | 8122   | 8096    | 0.001            | 0.001 | 0.001 | 0.001 |
| (1691)                            | 53.6213     | 0.6168    | 7835    | 7082    | 7298   | 7009    | 0.001            | 0.001 | 0.001 | 0.001 |
| (1299)                            | 53.7379     | 1.1589    | 15107   | 12591   | 9434   | 11777   | 0.001            | 0.001 | 0.001 | 0.001 |
| (1385)                            | 53.7879     | 2.1495    | 18455   | 15664   | 14350  | 13794   | 0.002            | 0.002 | 0.001 | 0.001 |
| (1467)                            | 53.7879     | 2.7477    | 12012   | 11434   | 12168  | 12335   | 0.001            | 0.001 | 0.001 | 0.001 |
| (1199)                            | 53.7879     | 1.4112    | 20176   | 22074   | 17421  | 17764   | 0.002            | 0.002 | 0.002 | 0.002 |
| (1780)                            | 53.8713     | 3.1589    | 4800    | 5611    | 4551   | 4519    | 0.000            | 0.001 | 0.000 | 0.000 |
| (1336)                            | 53.9213     | 1.2150    | 12001   | 9896    | 7633   | 9779    | 0.001            | 0.001 | 0.001 | 0.001 |
| (1614)                            | 54.0213     | 2.1308    | 15360   | 13160   | 13615  | 12573   | 0.002            | 0.001 | 0.001 | 0.001 |
| (1088)                            | 54.1713     | 1.3645    | 16173   | 16952   | 14889  | 15399   | 0.002            | 0.002 | 0.002 | 0.002 |

| Compound Name        | RT 1D (min) | RT 2D (s) | Volume  |         |         |          | Percent Response |       |       |       |
|----------------------|-------------|-----------|---------|---------|---------|----------|------------------|-------|-------|-------|
|                      |             |           | HM_1    | HM_2    | LM_1    | LM_2     | HM_1             | HM_2  | LM_1  | LM_2  |
| (1771)               | 54.2546     | 2.8598    | 6303    | 6994    | 5712    | 5822     | 0.001            | 0.001 | 0.001 | 0.001 |
| (1748)               | 54.3379     | 2.5981    | 7377    | 6989    | 5962    | 6671     | 0.001            | 0.001 | 0.001 | 0.001 |
| (1438)               | 54.3379     | 1.5794    | 7077    | 7526    | 5388    | 6403     | 0.001            | 0.001 | 0.001 | 0.001 |
| (1156)               | 54.3546     | 1.3551    | 13297   | 14554   | 10415   | 13459    | 0.001            | 0.001 | 0.001 | 0.001 |
| (1772)               | 54.3546     | 1.9907    | 8683    | 7314    | 8399    | 6973     | 0.001            | 0.001 | 0.001 | 0.001 |
| (1602)               | 54.3713     | 2.2056    | 11989   | 9231    | 9993    | 8956     | 0.001            | 0.001 | 0.001 | 0.001 |
| (1148)               | 54.5046     | 1.3178    | 21195   | 21497   | 16635   | 20590    | 0.002            | 0.002 | 0.002 | 0.002 |
| (1426)               | 54.5046     | 3.0187    | 14203   | 12915   | 16731   | 14799    | 0.001            | 0.001 | 0.002 | 0.001 |
| (1666)               | 54.5546     | 3.8318    | 7246    | 6419    | 5658    | 6406     | 0.001            | 0.001 | 0.001 | 0.001 |
| (1513)               | 54.5713     | 3.2150    | 9894    | 9052    | 10216   | 10338    | 0.001            | 0.001 | 0.001 | 0.001 |
| (361)                | 54.6046     | 2.2710    | 59079   | 52657   | 40087   | 73848    | 0.006            | 0.005 | 0.004 | 0.007 |
| (1523)               | 54.6546     | 1.7570    | 9623    | 8374    | 8501    | 8616     | 0.001            | 0.001 | 0.001 | 0.001 |
| (1437)               | 54.6879     | 2.0374    | 6879    | 6445    | 6994    | 6384     | 0.001            | 0.001 | 0.001 | 0.001 |
| (1021)               | 54.7213     | 1.2897    | 10177   | 10169   | 7907    | 10127    | 0.001            | 0.001 | 0.001 | 0.001 |
| (1045)               | 54.8046     | 1.4673    | 15342   | 14765   | 11537   | 14974    | 0.002            | 0.001 | 0.001 | 0.002 |
| (1643)               | 54.8046     | 2.6542    | 9059    | 7076    | 6522    | 8133     | 0.001            | 0.001 | 0.001 | 0.001 |
| (987)                | 54.8213     | 3.2897    | 22210   | 19796   | 16922   | 21345    | 0.002            | 0.002 | 0.002 | 0.002 |
| (1124)               | 54.8213     | 1.0561    | 15388   | 13589   | 12078   | 16579    | 0.002            | 0.001 | 0.001 | 0.002 |
| (1123)               | 54.8879     | 1.2243    | 19710   | 19976   | 16638   | 20708    | 0.002            | 0.002 | 0.002 | 0.002 |
| (1625)               | 54.9879     | 2.0841    | 7246    | 6222    | 5332    | 5837     | 0.001            | 0.001 | 0.001 | 0.001 |
| (1765)               | 55.0379     | 3.8411    | 5205    | 4424    | 4983    | 5362     | 0.001            | 0.000 | 0.001 | 0.001 |
| (1556)               | 55.0546     | 1.9159    | 8690    | 6544    | 7743    | 7814     | 0.001            | 0.001 | 0.001 | 0.001 |
| (1644)               | 55.1546     | 3.4019    | 9930    | 8739    | 9036    | 9749     | 0.001            | 0.001 | 0.001 | 0.001 |
| (1115)               | 55.2046     | 1.1402    | 17578   | 16967   | 15328   | 17069    | 0.002            | 0.002 | 0.002 | 0.002 |
| (945)                | 55.2379     | 2.3364    | 13196   | 11329   | 12293   | 13117    | 0.001            | 0.001 | 0.001 | 0.001 |
| (1145)               | 55.3546     | 2.6542    | 16000   | 14374   | 13960   | 16779    | 0.002            | 0.001 | 0.001 | 0.002 |
| (1548)               | 55.4046     | 0.9065    | 10947   | 10523   | 8538    | 10613    | 0.001            | 0.001 | 0.001 | 0.001 |
| (1472)               | 55.4213     | 1.9626    | 14375   | 12074   | 11361   | 11470    | 0.001            | 0.001 | 0.001 | 0.001 |
| (1054)               | 55.4379     | 1.1028    | 15844   | 15635   | 14666   | 14658    | 0.002            | 0.002 | 0.001 | 0.001 |
| (1557)               | 55.4546     | 2.2243    | 6902    | 5898    | 5634    | 6109     | 0.001            | 0.001 | 0.001 | 0.001 |
| (1734)               | 55.4879     | 2.4486    | 8550    | 7924    | 8002    | 8285     | 0.001            | 0.001 | 0.001 | 0.001 |
| (1668)               | 55.5046     | 2.6355    | 5518    | 5066    | 4387    | 4807     | 0.001            | 0.001 | 0.000 | 0.000 |
| (1729)               | 55.5546     | 1.3271    | 6611    | 6230    | 5763    | 4987     | 0.001            | 0.001 | 0.001 | 0.001 |
| (1617)               | 55.5713     | 1.6636    | 13901   | 11062   | 12587   | 12101    | 0.001            | 0.001 | 0.001 | 0.001 |
| (1206)               | 55.6879     | 1.0467    | 9088    | 9396    | 8754    | 7873     | 0.001            | 0.001 | 0.001 | 0.001 |
| (1646)               | 55.7046     | 1.5327    | 8354    | 7275    | 7618    | 7179     | 0.001            | 0.001 | 0.001 | 0.001 |
| Dibutyl phtalate (5) | 55.9546     | 1.7944    | 9903034 | 7400349 | 4689719 | 19576016 | 0.978            | 0.741 | 0.478 | 1.973 |
| (253)                | 55.9546     | 3.7944    | 46607   | 40681   | 35886   | 71723    | 0.005            | 0.004 | 0.004 | 0.007 |
| (289)                | 56.0213     | 0.0935    | 65877   | 60832   | 47212   | 93819    | 0.007            | 0.006 | 0.005 | 0.009 |
| (354)                | 56.0213     | 1.0000    | 108438  | 99193   | 81999   | 143224   | 0.011            | 0.010 | 0.008 | 0.014 |
| (373)                | 56.0213     | 0.4860    | 40863   | 37408   | 30917   | 55979    | 0.004            | 0.004 | 0.003 | 0.006 |

| Compound Name | RT 1D (min) | RT 2D (s) | Volume |       |       |        | Percent Response |       |       |       |
|---------------|-------------|-----------|--------|-------|-------|--------|------------------|-------|-------|-------|
|               |             |           | HM_1   | HM_2  | LM_1  | LM_2   | HM_1             | HM_2  | LM_1  | LM_2  |
| (523)         | 56.0213     | 1.4393    | 13759  | 11867 | 12317 | 16067  | 0.001            | 0.001 | 0.001 | 0.002 |
| (1103)        | 56.2879     | 1.4673    | 9832   | 9544  | 11008 | 13638  | 0.001            | 0.001 | 0.001 | 0.001 |
| (1304)        | 56.3046     | 0.4206    | 6775   | 5950  | 6611  | 7361   | 0.001            | 0.001 | 0.001 | 0.001 |
| (1374)        | 56.3379     | 2.1121    | 6792   | 6459  | 6970  | 8771   | 0.001            | 0.001 | 0.001 | 0.001 |
| (1181)        | 56.4046     | 1.6636    | 11451  | 11324 | 11170 | 13476  | 0.001            | 0.001 | 0.001 | 0.001 |
| (1653)        | 56.4546     | 2.5701    | 4947   | 4766  | 5907  | 5691   | 0.000            | 0.000 | 0.001 | 0.001 |
| (1579)        | 56.5546     | 2.3458    | 6089   | 7030  | 7077  | 7532   | 0.001            | 0.001 | 0.001 | 0.001 |
| (976)         | 56.6379     | 0.8972    | 20601  | 22016 | 21775 | 22662  | 0.002            | 0.002 | 0.002 | 0.002 |
| (1554)        | 56.6379     | 3.9065    | 2533   | 3785  | 3487  | 3652   | 0.000            | 0.000 | 0.000 | 0.000 |
| (1313)        | 56.6546     | 1.6916    | 8716   | 9051  | 9483  | 10251  | 0.001            | 0.001 | 0.001 | 0.001 |
| (1375)        | 56.6546     | 1.2991    | 5196   | 6205  | 7792  | 6671   | 0.001            | 0.001 | 0.001 | 0.001 |
| (1652)        | 56.6546     | 2.7850    | 4078   | 5299  | 6097  | 4726   | 0.000            | 0.001 | 0.001 | 0.000 |
| (1526)        | 56.7379     | 2.4112    | 9338   | 11570 | 11674 | 10902  | 0.001            | 0.001 | 0.001 | 0.001 |
| (1711)        | 56.7379     | 3.2243    | 7685   | 8520  | 9785  | 9059   | 0.001            | 0.001 | 0.001 | 0.001 |
| (1186)        | 56.7546     | 1.9720    | 10573  | 10199 | 21332 | 11932  | 0.001            | 0.001 | 0.002 | 0.001 |
| (1534)        | 56.8379     | 3.8037    | 5644   | 6462  | 6855  | 6784   | 0.001            | 0.001 | 0.001 | 0.001 |
| (1659)        | 56.8546     | 3.5981    | 4935   | 5117  | 5081  | 5746   | 0.000            | 0.001 | 0.001 | 0.001 |
| (1196)        | 56.8546     | 1.4766    | 16858  | 19186 | 21354 | 21621  | 0.002            | 0.002 | 0.002 | 0.002 |
| (1044)        | 56.9879     | 0.8411    | 17790  | 18950 | 17212 | 19097  | 0.002            | 0.002 | 0.002 | 0.002 |
| (1510)        | 57.0046     | 1.9159    | 6419   | 5961  | 6470  | 6929   | 0.001            | 0.001 | 0.001 | 0.001 |
| (1435)        | 57.0213     | 1.7290    | 6201   | 7541  | 7203  | 7756   | 0.001            | 0.001 | 0.001 | 0.001 |
| (1631)        | 57.0213     | 2.1869    | 6135   | 6168  | 5635  | 6986   | 0.001            | 0.001 | 0.001 | 0.001 |
| (1151)        | 57.0879     | 1.3832    | 10428  | 9914  | 10857 | 12938  | 0.001            | 0.001 | 0.001 | 0.001 |
| (1429)        | 57.1213     | 1.2243    | 8131   | 8481  | 8859  | 8797   | 0.001            | 0.001 | 0.001 | 0.001 |
| (772)         | 57.2213     | 1.3832    | 17137  | 16183 | 17841 | 18911  | 0.002            | 0.002 | 0.002 | 0.002 |
| (485)         | 57.2546     | 2.6168    | 21333  | 20255 | 27988 | 27582  | 0.002            | 0.002 | 0.003 | 0.003 |
| (1002)        | 57.3046     | 0.8131    | 24441  | 23771 | 22113 | 21819  | 0.002            | 0.002 | 0.002 | 0.002 |
| (1413)        | 57.3213     | 3.3551    | 19560  | 18638 | 20693 | 18553  | 0.002            | 0.002 | 0.002 | 0.002 |
| (1259)        | 57.3379     | 3.0935    | 12814  | 12283 | 14648 | 13313  | 0.001            | 0.001 | 0.001 | 0.001 |
| (1549)        | 57.3379     | 3.9533    | 2994   | 3030  | 3312  | 3352   | 0.000            | 0.000 | 0.000 | 0.000 |
| (92)          | 57.3546     | 1.3832    | 84084  | 82084 | 79365 | 163762 | 0.008            | 0.008 | 0.008 | 0.017 |
| (1443)        | 57.3546     | 3.8318    | 8144   | 7702  | 8428  | 8205   | 0.001            | 0.001 | 0.001 | 0.001 |
| (1488)        | 57.3546     | 3.7290    | 7456   | 7380  | 7471  | 7762   | 0.001            | 0.001 | 0.001 | 0.001 |
| (970)         | 57.5213     | 0.7850    | 12235  | 11703 | 10979 | 11936  | 0.001            | 0.001 | 0.001 | 0.001 |
| (1593)        | 57.5713     | 2.5047    | 5663   | 6105  | 5656  | 6071   | 0.001            | 0.001 | 0.001 | 0.001 |
| (1246)        | 57.5713     | 1.2430    | 10189  | 8223  | 8757  | 9980   | 0.001            | 0.001 | 0.001 | 0.001 |
| (1702)        | 57.6379     | 3.0000    | 6954   | 7215  | 6318  | 6825   | 0.001            | 0.001 | 0.001 | 0.001 |
| (1575)        | 57.6546     | 2.2430    | 6394   | 6380  | 6054  | 6717   | 0.001            | 0.001 | 0.001 | 0.001 |
| (1635)        | 57.6713     | 3.6729    | 9712   | 8088  | 9259  | 8565   | 0.001            | 0.001 | 0.001 | 0.001 |
| (596)         | 57.6879     | 0.6355    | 28119  | 25508 | 24224 | 23114  | 0.003            | 0.003 | 0.002 | 0.002 |
| (1509)        | 57.7379     | 2.4766    | 13103  | 10756 | 10130 | 12066  | 0.001            | 0.001 | 0.001 | 0.001 |

| Compound Name | RT 1D (min) | RT 2D (s) | Volume |       |       |       | Percent Response |       |       |       |
|---------------|-------------|-----------|--------|-------|-------|-------|------------------|-------|-------|-------|
|               |             |           | HM_1   | HM_2  | LM_1  | LM_2  | HM_1             | HM_2  | LM_1  | LM_2  |
| (1663)        | 57.7379     | 2.7383    | 8150   | 7379  | 7381  | 6587  | 0.001            | 0.001 | 0.001 | 0.001 |
| (1228)        | 57.7713     | 0.4299    | 16058  | 14597 | 14078 | 14213 | 0.002            | 0.001 | 0.001 | 0.001 |
| (1479)        | 57.8379     | 1.6449    | 8649   | 8889  | 8948  | 9480  | 0.001            | 0.001 | 0.001 | 0.001 |
| (1333)        | 57.8713     | 3.3832    | 17809  | 17258 | 16081 | 17806 | 0.002            | 0.002 | 0.002 | 0.002 |
| (1168)        | 57.9379     | 0.3832    | 14954  | 13432 | 11065 | 13037 | 0.001            | 0.001 | 0.001 | 0.001 |
| (1128)        | 58.0213     | 0.7383    | 18068  | 17922 | 16038 | 16306 | 0.002            | 0.002 | 0.002 | 0.002 |
| (1286)        | 58.0213     | 1.3271    | 17806  | 16336 | 14124 | 17189 | 0.002            | 0.002 | 0.001 | 0.002 |
| (1407)        | 58.0879     | 1.1495    | 8751   | 7121  | 7362  | 8070  | 0.001            | 0.001 | 0.001 | 0.001 |
| (1608)        | 58.1213     | 3.2243    | 9044   | 8527  | 7855  | 8360  | 0.001            | 0.001 | 0.001 | 0.001 |
| (1541)        | 58.1379     | 0.9813    | 7548   | 7197  | 6417  | 7204  | 0.001            | 0.001 | 0.001 | 0.001 |
| (1241)        | 58.1546     | 0.4019    | 11704  | 11663 | 10043 | 10488 | 0.001            | 0.001 | 0.001 | 0.001 |
| (1147)        | 58.3713     | 0.7009    | 18875  | 15673 | 13465 | 17770 | 0.002            | 0.002 | 0.001 | 0.002 |
| (1179)        | 58.4713     | 0.3832    | 19647  | 18116 | 15311 | 17702 | 0.002            | 0.002 | 0.002 | 0.002 |
| (995)         | 58.5879     | 0.6916    | 23996  | 23575 | 20815 | 24339 | 0.002            | 0.002 | 0.002 | 0.002 |
| (965)         | 58.8713     | 0.4019    | 18545  | 17124 | 14807 | 18405 | 0.002            | 0.002 | 0.002 | 0.002 |
| (1017)        | 59.1213     | 0.3738    | 14747  | 14054 | 12951 | 12419 | 0.001            | 0.001 | 0.001 | 0.001 |
| (899)         | 59.5713     | 0.3738    | 18823  | 19276 | 16005 | 16642 | 0.002            | 0.002 | 0.002 | 0.002 |
| (820)         | 59.7046     | 0.3832    | 23969  | 20794 | 22673 | 22378 | 0.002            | 0.002 | 0.002 | 0.002 |
| (966)         | 59.8879     | 0.5981    | 12542  | 10438 | 9685  | 11171 | 0.001            | 0.001 | 0.001 | 0.001 |
| (555)         | 60.2213     | 0.3738    | 79831  | 74262 | 66334 | 72560 | 0.008            | 0.007 | 0.007 | 0.007 |
| (865)         | 60.4046     | 0.5794    | 55400  | 49476 | 49265 | 52426 | 0.005            | 0.005 | 0.005 | 0.005 |
| (540)         | 60.7046     | 0.3738    | 44489  | 45054 | 42399 | 45078 | 0.004            | 0.005 | 0.004 | 0.005 |
| (710)         | 60.7213     | 0.5607    | 42109  | 39918 | 39086 | 38514 | 0.004            | 0.004 | 0.004 | 0.004 |
| (593)         | 60.8546     | 0.3738    | 31266  | 26343 | 27103 | 27492 | 0.003            | 0.003 | 0.003 | 0.003 |
| (794)         | 60.9879     | 0.5607    | 30425  | 28213 | 28731 | 28958 | 0.003            | 0.003 | 0.003 | 0.003 |
| (506)         | 61.0879     | 0.3738    | 39415  | 41112 | 35544 | 40499 | 0.004            | 0.004 | 0.004 | 0.004 |
| (474)         | 61.3546     | 0.3738    | 35733  | 37039 | 29315 | 35520 | 0.004            | 0.004 | 0.003 | 0.004 |
| (613)         | 61.4213     | 0.5514    | 37808  | 36730 | 34200 | 33744 | 0.004            | 0.004 | 0.003 | 0.003 |
| (578)         | 61.6379     | 0.5607    | 28056  | 27757 | 26224 | 26995 | 0.003            | 0.003 | 0.003 | 0.003 |
| (443)         | 61.7713     | 0.3738    | 52938  | 51654 | 44473 | 52799 | 0.005            | 0.005 | 0.005 | 0.005 |
| (516)         | 61.8713     | 0.5607    | 21666  | 23381 | 23901 | 25887 | 0.002            | 0.002 | 0.002 | 0.003 |
| (522)         | 62.0213     | 0.5607    | 41160  | 40218 | 39298 | 41248 | 0.004            | 0.004 | 0.004 | 0.004 |
| (390)         | 62.3546     | 0.3738    | 77057  | 75779 | 67660 | 73098 | 0.008            | 0.008 | 0.007 | 0.007 |
| (489)         | 62.3713     | 0.5514    | 84593  | 81733 | 79219 | 81466 | 0.008            | 0.008 | 0.008 | 0.008 |
| (534)         | 62.6213     | 0.5607    | 28753  | 26882 | 27457 | 27039 | 0.003            | 0.003 | 0.003 | 0.003 |
| (369)         | 62.8213     | 0.3738    | 90783  | 93840 | 77942 | 87604 | 0.009            | 0.009 | 0.008 | 0.009 |
| (477)         | 62.9046     | 0.5607    | 46597  | 46397 | 41981 | 43900 | 0.005            | 0.005 | 0.004 | 0.004 |
| (384)         | 62.9379     | 0.3738    | 53504  | 47537 | 41406 | 44645 | 0.005            | 0.005 | 0.004 | 0.004 |
| (345)         | 63.2379     | 0.3738    | 51225  | 50639 | 44722 | 52344 | 0.005            | 0.005 | 0.005 | 0.005 |
| (340)         | 63.3379     | 0.3738    | 51004  | 47336 | 42529 | 47320 | 0.005            | 0.005 | 0.004 | 0.005 |
| (457)         | 63.3713     | 0.5607    | 64673  | 65578 | 58353 | 61990 | 0.006            | 0.007 | 0.006 | 0.006 |

| Compound Name | RT 1D (min) | RT 2D (s) | Volume |        |        |        | Percent Response |       |       |       |
|---------------|-------------|-----------|--------|--------|--------|--------|------------------|-------|-------|-------|
|               |             |           | HM_1   | HM_2   | LM_1   | LM_2   | HM_1             | HM_2  | LM_1  | LM_2  |
| (458)         | 63.6213     | 0.5607    | 45028  | 42398  | 43249  | 41673  | 0.004            | 0.004 | 0.004 | 0.004 |
| (323)         | 63.7713     | 0.3738    | 156981 | 164975 | 134764 | 152382 | 0.015            | 0.017 | 0.014 | 0.015 |
| (393)         | 63.9213     | 0.5607    | 74989  | 73533  | 76707  | 71444  | 0.007            | 0.007 | 0.008 | 0.007 |
| (401)         | 64.2046     | 0.5607    | 47607  | 50213  | 48321  | 48838  | 0.005            | 0.005 | 0.005 | 0.005 |
| (297)         | 64.2546     | 0.3738    | 131145 | 141182 | 118545 | 133386 | 0.013            | 0.014 | 0.012 | 0.013 |
| (388)         | 64.3879     | 0.5607    | 64610  | 61806  | 62825  | 61506  | 0.006            | 0.006 | 0.006 | 0.006 |
| (415)         | 64.5713     | 0.5607    | 38886  | 40194  | 39300  | 39094  | 0.004            | 0.004 | 0.004 | 0.004 |
| (305)         | 64.7046     | 0.3738    | 165735 | 180590 | 144283 | 156499 | 0.016            | 0.018 | 0.015 | 0.016 |
| (537)         | 64.7379     | 0.8037    | 26770  | 27822  | 28995  | 26342  | 0.003            | 0.003 | 0.003 | 0.003 |
| (332)         | 64.8213     | 0.5607    | 110677 | 110372 | 108496 | 112516 | 0.011            | 0.011 | 0.011 | 0.011 |
| (705)         | 65.1546     | 0.2056    | 22215  | 21855  | 24154  | 24533  | 0.002            | 0.002 | 0.002 | 0.002 |
| (275)         | 65.1879     | 0.3738    | 150453 | 163587 | 136476 | 144155 | 0.015            | 0.016 | 0.014 | 0.015 |
| (365)         | 65.2713     | 0.5607    | 111104 | 116449 | 106028 | 112307 | 0.011            | 0.012 | 0.011 | 0.011 |
| (269)         | 65.4379     | 0.3738    | 79944  | 88845  | 77335  | 86367  | 0.008            | 0.009 | 0.008 | 0.009 |
| (271)         | 65.6713     | 0.3738    | 83434  | 86497  | 73213  | 80898  | 0.008            | 0.009 | 0.007 | 0.008 |
| (347)         | 65.7713     | 0.5607    | 137386 | 135839 | 127036 | 140036 | 0.014            | 0.014 | 0.013 | 0.014 |
| (804)         | 65.7713     | 0.1589    | 20822  | 20869  | 23221  | 20589  | 0.002            | 0.002 | 0.002 | 0.002 |
| (307)         | 65.9046     | 0.3738    | 72497  | 74770  | 51727  | 70865  | 0.007            | 0.007 | 0.005 | 0.007 |

Notes:

- 1) Listed are the 1450 peak-regions found by GC Image
- 2) HM: high elevation, monsoon pu-erh, LM: low elevation, monsoon pu-erh
- 3) Compounds with asterisks (107) were found by GC Image without the assistance of Ion Analytics
- 4) Compounds without asterisks (200) were confirmed by GC Image after analysis by Ion Analytics (307 total compounds detected)
- 5) Percent response calculated from the peak volume divided by the sum of all peak volumes

**Table S2.** Compounds identified by Ion Analytics

| Compound                      | Target (T) /<br>Untargeted (UT) | High Elevation |                    | Low Elevation |                    |
|-------------------------------|---------------------------------|----------------|--------------------|---------------|--------------------|
|                               |                                 | RT             | Relative Response* | RT            | Relative Response* |
| Dimethyl sulfide              | T                               | 4.36           | 2.0852             | 4.30          | 3.1503             |
| Acetic acid                   | T                               | 4.96           | 6.4513             | 4.56          | 1.5136             |
| Hexane                        | T                               | 4.77           | 2.7920             | 4.70          | 2.6224             |
| 2-Methylfuran                 | T                               | 4.83           | 1.5972             | 4.83          | 0.9846             |
| (3E)-2-Methyl-1,3-pentadiene  | T                               | 5.17           | 0.4288             | 5.17          | 0.1315             |
| 3-Methylbutanal               | T                               | 5.43           | 0.0978             | 5.36          | 0.0381             |
| (2E)-Butenal                  | T                               | 5.43           | 0.0195             | 5.36          | 0.0622             |
| 2-Methylbutanal               | T                               | 5.49           | 1.1981             | 5.49          | 1.2191             |
| Cyclohexane                   | UT                              | 5.44           | 2.0038             | 5.56          | 5.0913             |
| Penten-3-ol                   | T                               | 5.70           | 4.2661             | 5.76          | 2.9236             |
| 319                           | UT                              | 5.83           | 0.2382             | 5.83          | 1.1451             |
| Pentanal                      | T                               | 5.96           | 0.5525             | 6.03          | 0.4923             |
| 2-Ethylfuran                  | T                               | 6.03           | 2.2178             | 6.09          | 1.4354             |
| (3E)-Penten-2-one             | T                               | 6.77           | 1.0268             | 6.90          | 0.7779             |
| 2-Methyl-3-pentanone          | T                               | 7.03           | 0.0864             | 7.10          | 0.0199             |
| Dimethyl disulfide            | T                               | 6.97           | 0.0315             | 7.17          | 0.0157             |
| Pyridine                      | T                               | 7.04           | 0.2614             | 7.17          | 0.1666             |
| 2-Methyl-2-butenal            | UT                              | 6.90           | 0.2657             | 6.97          | 0.1084             |
| Pentanol                      | T                               | 7.37           | 3.6966             | 7.51          | 1.6222             |
| (2Z)-Pentenol                 | T                               | 7.44           | 3.2772             | 7.57          | 2.0383             |
| Toluene                       | T                               | 7.50           | 10.8205            | 7.63          | 11.6565            |
| 311                           | T                               | 7.50           | 0.8669             | 7.64          | 0.5672             |
| Octene                        | T                               | 8.03           | 0.0805             | 8.16          | 0.0258             |
| 2-Hexanone                    | T                               | 7.97           | 0.1711             | 8.11          | 0.2025             |
| 2-Propylfuran                 | UT                              | 8.03           | 0.1892             | 8.17          | 0.0721             |
| Octane                        | UT                              | 8.23           | 1.5460             | 8.36          | 1.0899             |
| 4-Methyl-3-penten-2-one       | UT                              | 8.24           | 1.1730             | 8.44          | 0.9497             |
| Hexanal                       | T                               | 8.24           | 0.6515             | 8.44          | 0.5220             |
| 2-Ethyl-5-methylfuran         | UT                              | 8.30           | 0.4258             | 8.50          | 0.0620             |
| (3Z,5Z)-Octadiene             | UT                              | 8.63           | 0.0439             | 8.83          | 0.0424             |
| (4E)-Octene                   | UT                              | 8.70           | 0.1839             | 8.90          | 0.1301             |
| 2,4-Octadiene                 | UT                              | 8.90           | 0.0701             | 9.10          | 0.0404             |
| Butyl acetate                 | T                               | 8.64           | 0.0674             | 8.84          | 0.3186             |
| 1-Ethyl-1H-pyrrole            | T                               | 8.77           | 1.8014             | 8.97          | 0.6792             |
| Isovaleric acid               | T                               | 9.20           | 0.1667             | 9.33          | 0.0906             |
| 1,3-Octadiene                 | UT                              | 9.03           | 0.1119             | 9.23          | 0.1500             |
| 2-Methyl-2-pentenal           | T                               | 9.31           | 0.0370             | 9.51          | 0.0143             |
| Furfural                      | UT                              | 9.38           | 0.0463             | —             | —                  |
| 18                            | T                               | 9.44           | 0.0203             | —             | —                  |
| 2-Methylbutanoic acid         | T                               | 9.53           | 0.0706             | 9.73          | 0.0564             |
| 2,5,5-Trimethyl-1-hexen-3-yne | T                               | 9.77           | 0.2764             | 9.97          | 0.2599             |
| (2E)-Hexenal                  | UT                              | 9.98           | 0.0547             | —             | —                  |
| 2-Furanmethanol               | T                               | 10.06          | 0.0598             | —             | —                  |
| 2-(2-Propenyl)furan           | UT                              | 10.10          | 0.0449             | 10.37         | 0.0156             |
| (3Z)-Hexenol                  | T                               | 10.05          | 3.2796             | 10.31         | 0.0286             |
| 10                            | T                               | 10.30          | 0.0641             | 10.50         | 0.0514             |
| Ethylbenzene                  | T                               | 10.44          | 0.2014             | 10.64         | 0.3217             |
| (2E)-Hexenol                  | T                               | 10.45          | 1.0070             | —             | —                  |
| (2Z)-Hexenol                  | T                               | 10.58          | 0.0471             | 10.25         | 0.0161             |
| Hexanol                       | T                               | 10.51          | 0.3811             | 10.71         | 0.0725             |
| p-Xylene                      | T                               | 10.70          | 0.5339             | 10.90         | 0.7051             |
| 1,3-trans,5-cis-octatriene    | UT                              | 10.97          | 0.2116             | 11.17         | 0.2235             |
| n-Butyl ether                 | UT                              | 11.10          | 0.0379             | 11.30         | 0.2329             |
| 2-Heptanone                   | T                               | 11.38          | 0.6060             | 11.64         | 0.4306             |
| 2-Butylfuran                  | UT                              | 11.50          | 0.4444             | 11.70         | 0.2201             |

| Compound                       | Target (T) /<br>Untargeted (UT) | High Elevation |                    | Low Elevation |                    |
|--------------------------------|---------------------------------|----------------|--------------------|---------------|--------------------|
|                                |                                 | RT             | Relative Response* | RT            | Relative Response* |
| Styrene                        | T                               | 11.51          | 2.7068             | 11.77         | 3.8074             |
| Methoxy-phenyl-oxime           | UT                              | 11.69          | 8.1978             | 11.75         | 0.5309             |
| Butyl-2-propenoate             | T                               | 11.57          | 0.6394             | 11.84         | 4.3467             |
| Nonane                         | T                               | 11.70          | 0.2603             | 12.37         | 0.6379             |
| 2-Heptanol                     | UT                              | 11.71          | 0.4728             | —             | —                  |
| Heptanal                       | T                               | 11.84          | 0.1199             | 12.04         | 0.1134             |
| 483                            | UT                              | 12.11          | 0.0578             | 12.37         | 0.0432             |
| Butyl propanoate               | T                               | 12.11          | 0.0747             | 12.31         | 1.1969             |
| 2,5-Dimethylpyrazine           | UT                              | 12.31          | 0.0971             | —             | —                  |
| Butyrolactone                  | T                               | 12.55          | 0.1409             | 12.68         | 0.0412             |
| Amyl acetate                   | T                               | 12.31          | 0.0276             | 12.57         | 0.0198             |
| 2-Acetylfuran                  | UT                              | 12.32          | 0.1684             | 12.59         | 0.0816             |
| 2(5H)-Furanone                 | T                               | 12.62          | 0.0914             | —             | —                  |
| 484                            | UT                              | 12.64          | 0.0638             | 12.84         | 0.0190             |
| 485                            | UT                              | 13.31          | 0.3394             | 13.51         | 0.2091             |
| $\alpha$ -Pinene               | T                               | 13.37          | 0.2885             | 13.57         | 0.2410             |
| 486                            | UT                              | 13.58          | 0.4476             | 13.84         | 0.2952             |
| 316                            | T                               | 13.99          | 0.1005             | 14.25         | 0.0064             |
| Camphene                       | T                               | 14.04          | 0.0655             | 14.30         | 0.0334             |
| 6-Methyl-2-heptanone           | T                               | 14.18          | 0.0426             | 14.38         | 0.0524             |
| Propylbenzene                  | UT                              | 14.18          | 0.0858             | 14.44         | 0.1059             |
| (2E)-Heptenal                  | UT                              | 14.25          | 0.1583             | 14.45         | 0.1998             |
| Benzaldehyde                   | T                               | 14.52          | 3.7549             | 14.79         | 1.9456             |
| p-Ethyltoluene                 | T                               | 14.58          | 0.1801             | 14.84         | 0.2109             |
| 3,5,5-Trimethyl-2-hexene       | UT                              | 14.98          | 3.8800             | 15.25         | 3.8993             |
| Heptanol                       | T                               | 14.79          | 0.0493             | —             | —                  |
| 487                            | UT                              | 15.11          | 0.0412             | 15.37         | 0.0388             |
| Dimethyl trisulfide            | T                               | 15.05          | 0.0797             | 15.25         | 0.0723             |
| Hexanoic acid                  | T                               | 15.01          | 1.8020             | 15.14         | 0.3366             |
| Octen-3-one                    | T                               | 15.25          | 0.6164             | 15.45         | 1.0975             |
| Octen-3-ol                     | T                               | 15.25          | 13.2913            | 15.45         | 15.4288            |
| Phenol                         | T                               | 15.30          | 0.8458             | 15.49         | 0.1682             |
| $\beta$ -Pinene                | T                               | 15.37          | 0.0776             | 15.57         | 0.0868             |
| o-Ethyltoluene                 | T                               | 15.44          | 0.0287             | 15.64         | 0.0267             |
| 2,3-Octanedione                | T                               | 15.45          | 1.1556             | 15.65         | 1.4751             |
| (3E)-Hexenoic acid             | UT                              | 15.75          | 0.0728             | —             | —                  |
| 101                            | T                               | 15.66          | 0.0907             | —             | —                  |
| 2,6-Dimethyl-2,6-octadiene     | UT                              | 15.64          | 0.2641             | 15.90         | 0.1098             |
| 6-Methyl-5-Hepten-2-one        | T                               | 15.65          | 0.6711             | 15.85         | 0.6170             |
| Myrcene                        | T                               | 15.84          | 1.0951             | 16.04         | 0.5794             |
| 2-Octanone                     | T                               | 15.78          | 0.3535             | 16.05         | 0.3439             |
| 2-Pentylfuran                  | T                               | 15.84          | 8.5018             | 16.11         | 5.5629             |
| Dehydroxy-trans-linalool oxide | T                               | 15.98          | 0.2803             | 16.18         | 0.1129             |
| Butyl butanoate                | T                               | 15.98          | 0.2263             | 16.24         | 1.5925             |
| 1,2,4-Trimethylbenzene         | T                               | 16.04          | 0.2623             | 16.24         | 0.2793             |
| (2E,4Z)-Heptadienal            | T                               | 16.79          | 1.2942             | 16.33         | 0.4595             |
| Decane                         | UT                              | 16.17          | 0.1086             | 16.44         | 0.0889             |
| cis-2,6-Dimethyl-2,6-octadiene | UT                              | 16.30          | 0.3976             | 16.50         | 0.1667             |
| $\alpha$ -Phellandrene         | T                               | 16.57          | 0.2528             | 16.77         | 0.1933             |
| trans-2-(2-Pentenyl)furan      | UT                              | 16.31          | 0.3036             | 16.58         | 0.1900             |
| Octanal                        | T                               | 16.38          | 0.0596             | 16.58         | 0.0788             |
| 2-(2-Ethoxyethoxy)-ethanol     | UT                              | 16.52          | 0.3603             | 16.66         | 0.2292             |
| Dehydroxy-cis-linalool oxide   | T                               | 16.71          | 0.2875             | 16.91         | 0.1047             |
| (3Z)-Hexenyl acetate           | T                               | 16.51          | 0.1655             | —             | —                  |
| (2E,4E)-Heptadienal            | T                               | 16.79          | 1.2356             | 16.99         | 1.1019             |
| $\delta$ -3-Carene             | T                               | 16.84          | 0.0364             | 17.11         | 0.0448             |
| 488                            | UT                              | 16.99          | 0.8505             | 17.19         | 0.2508             |

| Compound                            | Target (T) /<br>Untargeted (UT) | High Elevation |                    | Low Elevation |                    |
|-------------------------------------|---------------------------------|----------------|--------------------|---------------|--------------------|
|                                     |                                 | RT             | Relative Response* | RT            | Relative Response* |
| α-Terpinene                         | T                               | 17.17          | 0.2892             | 17.37         | 0.1692             |
| 102                                 | T                               | 17.40          | 0.0358             | 17.53         | 0.0261             |
| 1,2,3-Trimethylbenzene              | T                               | 17.45          | 0.1350             | 17.65         | 0.0592             |
| para-Cymene                         | T                               | 17.51          | 1.3794             | 17.71         | 1.6442             |
| 2-Ethyl-1-hexanol                   | T                               | 17.59          | 1.0960             | 17.78         | 0.8661             |
| Limonene                            | T                               | 17.71          | 3.8650             | 17.91         | 3.1051             |
| (Z)-β-Ocimene                       | UT                              | 18.04          | 0.5992             | 18.24         | 0.2681             |
| Eucalyptol                          | T                               | 17.91          | 0.0128             | 18.11         | 0.0239             |
| Benzyl alcohol                      | T                               | 17.93          | 1.3626             | 18.14         | 0.1492             |
| 2,2,6-Trimethylcyclohexanone        | T                               | 18.05          | 1.1822             | 18.25         | 1.9650             |
| Indane                              | T                               | 18.11          | 0.0719             | 18.38         | 0.0715             |
| (3E)-Octen-2-one                    | UT                              | 18.12          | 0.6201             | 18.32         | 0.4330             |
| 5-Ethyl-2(5H)-furanone              | T                               | 18.15          | 0.1070             | 18.29         | 0.0533             |
| (E)-β-Ocimene                       | T                               | 18.57          | 2.1278             | 18.77         | 0.6000             |
| Indene                              | T                               | 18.58          | 0.0419             | 18.78         | 0.0258             |
| Benzeneacetaldehyde                 | T                               | 18.46          | 1.5868             | 18.66         | 1.5554             |
| Isobutyl angelate                   | UT                              | 18.71          | 0.0665             | 18.91         | 0.1054             |
| 1-Ethyl-1H-pyrrole-2-carboxaldehyde | T                               | 18.79          | 1.4226             | 18.93         | 0.5986             |
| (2E)-Octenal                        | UT                              | 19.06          | 0.1182             | 19.26         | 0.1091             |
| γ-Terpinene                         | T                               | 19.17          | 1.0409             | 19.37         | 1.0396             |
| 17                                  | T                               | 19.25          | 0.6094             | 19.45         | 0.7917             |
| (2E)-Octenol                        | T                               | 19.45          | 1.7861             | 19.66         | 2.9604             |
| Acetophenone                        | T                               | 19.59          | 0.3528             | 19.79         | 0.3663             |
| Octanol                             | T                               | 19.59          | 0.7350             | 19.79         | 0.7200             |
| Heptanoic acid                      | T                               | 19.61          | 0.2764             | —             | —                  |
| 123                                 | T                               | 19.66          | 1.4007             | 19.86         | 1.4363             |
| para-Cresol                         | T                               | 19.82          | 0.1128             | 20.02         | 0.1241             |
| cis-Linalool oxide (furanoid)       | T                               | 19.85          | 2.7055             | 20.05         | 0.0778             |
| 489                                 | UT                              | 19.97          | 0.2001             | 20.17         | 0.1863             |
| 490                                 | UT                              | 19.91          | 0.0469             | 20.11         | 0.0948             |
| 491                                 | UT                              | 20.04          | 0.3653             | 20.24         | 0.3581             |
| 492                                 | UT                              | 19.97          | 0.1894             | 20.64         | 0.1351             |
| 493                                 | UT                              | 20.31          | 0.1118             | 20.44         | 0.2046             |
| 2-Nonanone                          | T                               | 20.72          | 0.1432             | 20.85         | 0.2443             |
| trans-Linalool oxide (furanoid)     | T                               | 20.65          | 8.1600             | 20.78         | 0.0576             |
| 494                                 | UT                              | 20.50          | 0.2837             | 20.64         | 0.1831             |
| Terpinolene                         | T                               | 20.64          | 0.6027             | 20.84         | 0.3725             |
| para-Cymenene                       | T                               | 20.71          | 0.1686             | 20.85         | 0.0874             |
| 2-Methoxyphenol                     | T                               | 20.66          | 0.1263             | —             | —                  |
| (3E,5E)-Octadien-2-one              | T                               | 20.79          | 0.3273             | 20.99         | 0.2311             |
| Nonanal                             | T                               | 21.32          | 0.5859             | 21.45         | 0.3576             |
| Undecane                            | UT                              | 21.04          | 0.9798             | 21.24         | 0.3887             |
| Linalool                            | T                               | 21.12          | 13.0092            | 21.25         | 1.0975             |
| 495                                 | UT                              | 21.37          | 0.3598             | 21.44         | 0.1671             |
| Hotrienol                           | T                               | 21.32          | 5.1178             | 21.52         | 1.1974             |
| 105                                 | T                               | 21.66          | 0.1893             | 21.86         | 0.2314             |
| 6-Methyl-3,5-heptadiene-2-one       | UT                              | 21.39          | 0.3113             | 21.53         | 0.2243             |
| Maltol                              | T                               | 21.58          | 0.0443             | —             | —                  |
| cis-Thujone                         | UT                              | 21.59          | 1.0000             | 21.72         | 1.0000             |
| 496                                 | UT                              | 21.77          | 0.8377             | 21.90         | 0.3849             |
| 497                                 | UT                              | 21.90          | 1.2425             | 22.04         | 0.4483             |
| 114                                 | T                               | 21.86          | 0.0518             | —             | —                  |
| Phenylethyl alcohol                 | T                               | 21.87          | 4.1185             | 22.00         | 0.2573             |
| 498                                 | UT                              | 21.91          | 0.8848             | 22.04         | 0.3788             |
| α-Cyclocitral                       | T                               | 22.12          | 0.0362             | 22.32         | 0.0614             |
| 1,3,8-p-Menthatriene                | UT                              | 21.98          | 0.0317             | 22.38         | 0.0565             |
| 499                                 | UT                              | 22.17          | 0.2901             | 22.24         | 0.0850             |



| Compound                                 | Target (T) /<br>Untargeted (UT) | High Elevation |                    | Low Elevation |                    |
|------------------------------------------|---------------------------------|----------------|--------------------|---------------|--------------------|
|                                          |                                 | RT             | Relative Response* | RT            | Relative Response* |
| 2-Ethyl-m-xylene                         | UT                              | 22.25          | 0.0811             | 22.38         | 0.0400             |
| trans-Thujone                            | UT                              | 22.12          | 0.1066             | 22.25         | 0.1752             |
| 500                                      | UT                              | 22.44          | 0.8784             | 22.57         | 0.2697             |
| allo-Ocimene                             | T                               | 22.51          | 0.0509             | 22.71         | 0.0169             |
| 501                                      | UT                              | 22.65          | 0.1554             | 22.78         | 0.0420             |
| 502                                      | UT                              | 22.70          | 0.4021             | 22.84         | 0.0899             |
| Pentylcyclohexane                        | UT                              | 22.84          | 0.0724             | 23.04         | 0.0214             |
| 503                                      | UT                              | 22.84          | 0.3397             | 22.97         | 0.1156             |
| 3-Nonen-2-one                            | UT                              | 23.06          | 0.0949             | 23.19         | 0.0349             |
| 1-Ethyl-2,5-pyrrolidinedione             | T                               | 22.88          | 0.1220             | 23.01         | 0.0377             |
| 504                                      | UT                              | 22.97          | 0.4666             | 23.10         | 0.1043             |
| Benzyl nitrile                           | T                               | 23.14          | 2.3935             | 23.28         | 0.1192             |
| (R,S)-5-Ethyl-6-methyl-(3E)-hepten-2-one | T                               | 23.39          | 0.0909             | 23.59         | 0.0343             |
| Menthone                                 | T                               | 23.92          | 0.1146             | 24.05         | 0.1247             |
| 2-Ethylhexyl acetate                     | T                               | 23.51          | 0.2497             | 23.65         | 0.2041             |
| 505                                      | UT                              | 23.64          | 0.5648             | 23.70         | 0.1018             |
| 506                                      | UT                              | 23.70          | 0.5727             | 23.84         | 0.1819             |
| 507                                      | UT                              | 23.77          | 0.4532             | 23.90         | 0.1137             |
| 93                                       | T                               | 23.99          | 0.0307             | 24.12         | 0.0611             |
| 86                                       | T                               | 23.79          | 0.0339             | 23.92         | 0.0320             |
| 508                                      | UT                              | 23.97          | 0.4938             | 24.10         | 0.1145             |
| 509                                      | UT                              | 24.17          | 1.1400             | 24.30         | 0.2431             |
| Octanoic acid                            | T                               | 24.34          | 0.4761             | 24.41         | 0.0880             |
| Menthofuran                              | UT                              | 24.38          | 0.0739             | 24.51         | 0.0838             |
| 510                                      | UT                              | 24.50          | 1.1067             | 24.64         | 0.2803             |
| Nonanol                                  | T                               | 24.52          | 0.1567             | 24.65         | 0.0679             |
| cis-Linalool oxide (pyranoid)            | T                               | 24.59          | 0.6798             | 24.73         | 0.0846             |
| Ethyl benzoate                           | T                               | 24.65          | 2.2252             | 24.79         | 1.8609             |
| Menthol                                  | T                               | 24.79          | 0.0350             | 24.92         | 0.0264             |
| trans-Linalool oxide (pyranoid)          | T                               | 24.79          | 3.3896             | 24.93         | 0.3980             |
| Terpinen-4-ol                            | T                               | 25.05          | 0.1369             | 25.18         | 0.1177             |
| 2,4-Dimethylbenzaldehyde                 | T                               | 24.93          | 0.0457             | 24.99         | 0.0311             |
| 511                                      | UT                              | 25.24          | 0.2561             | —             | —                  |
| (3Z)-Hexenyl butyrate                    | T                               | 25.31          | 0.5908             | —             | —                  |
| Naphthalene                              | T                               | 25.46          | 1.5372             | 25.59         | 0.8007             |
| 2,6-Dimethyl-3,7-octadiene-2,6-diol      | T                               | 25.47          | 0.4280             | 25.54         | 0.1359             |
| Dodecene                                 | UT                              | 25.51          | 0.2004             | 25.64         | 0.1125             |
| (2E)-Hexenyl butyrate                    | UT                              | 25.65          | 0.2955             | —             | —                  |
| Hexyl butyrate                           | UT                              | 25.51          | 0.0448             | —             | —                  |
| 2-Decanone                               | T                               | 25.59          | 0.1954             | 25.72         | 0.2368             |
| $\alpha$ -Terpineol                      | T                               | 25.65          | 0.7392             | 25.79         | 0.3167             |
| Methyl salicylate                        | T                               | 25.86          | 16.7247            | 25.99         | 2.5181             |
| Dodecane                                 | UT                              | 25.91          | 3.6915             | 26.04         | 1.1799             |
| Methyl chavicol                          | UT                              | 25.98          | 0.0824             | 26.12         | 0.0847             |
| Safranal                                 | T                               | 26.12          | 0.2605             | 26.26         | 0.2679             |
| 513                                      | UT                              | 26.57          | 0.3849             | 26.70         | 0.1227             |
| Decanal                                  | T                               | 26.25          | 0.1239             | 26.32         | 0.0444             |
| 512                                      | UT                              | 26.51          | 0.0560             | —             | NA                 |
| 129                                      | T                               | 26.52          | 0.0633             | 26.65         | 0.0480             |
| 131                                      | T                               | 26.99          | 0.6501             | 27.06         | 0.3871             |
| 2-Phenoxyethanol                         | T                               | 27.01          | 0.1049             | 27.07         | 0.0394             |
| 514                                      | UT                              | 27.04          | 0.0706             | —             | —                  |
| $\beta$ -Cyclocitral                     | T                               | 27.12          | 0.4802             | 27.26         | 0.5672             |
| Nerol                                    | T                               | 27.32          | 0.0416             | —             | —                  |
| (3Z)-Hexenyl valerate                    | UT                              | 27.51          | 0.2300             | —             | —                  |
| (3Z)-Hexenyl isovalerate                 | T                               | 27.65          | 0.0198             | —             | —                  |
| Bornylene                                | T                               | 27.52          | 0.0643             | 27.65         | 0.0338             |

| Compound                                           | Target (T) /<br>Untargeted (UT) | High Elevation |                    | Low Elevation |                    |
|----------------------------------------------------|---------------------------------|----------------|--------------------|---------------|--------------------|
|                                                    |                                 | RT             | Relative Response* | RT            | Relative Response* |
| 515                                                | UT                              | 27.78          | 0.5410             | 27.91         | 0.2642             |
| 516                                                | UT                              | 27.97          | 0.4282             | 28.11         | 0.1364             |
| 132                                                | T                               | 28.00          | 0.7552             | 28.13         | 0.5258             |
| 518                                                | UT                              | 28.17          | 0.1284             | 28.24         | 0.0280             |
| Carvone                                            | T                               | 28.26          | 0.0119             | 28.33         | 0.0290             |
| Geraniol                                           | T                               | 28.52          | 1.4990             | 28.59         | 0.0723             |
| Linalool acetate                                   | T                               | 28.58          | 0.0358             | 28.71         | 0.0318             |
| Phenylethyl acetate                                | T                               | 28.72          | 0.0808             | —             | —                  |
| 519                                                | UT                              | 28.91          | 0.1720             | 28.97         | 0.0555             |
| $\beta$ -Homocyclocitral                           | T                               | 28.92          | 0.0270             | 28.99         | 0.0164             |
| Nonanoic acid                                      | T                               | 29.00          | 0.3943             | 29.00         | 0.1058             |
| Pentyl hexanoate                                   | UT                              | 30.05          | 0.0336             | —             | —                  |
| 520                                                | UT                              | 29.91          | 0.1693             | 30.04         | 0.0728             |
| (E)-Anethole                                       | UT                              | 30.19          | 0.0111             | 30.25         | 0.0285             |
| 521                                                | UT                              | 30.24          | 1.3423             | 30.31         | 0.4050             |
| 2-Undecanone                                       | UT                              | 30.32          | 0.1309             | 30.45         | 0.0880             |
| Indole                                             | T                               | 30.56          | 2.2271             | 30.69         | 3.7285             |
| Tridecane                                          | UT                              | 30.57          | 1.9677             | 30.64         | 0.7187             |
| 2-Methylnaphthalene                                | T                               | 30.66          | 0.3123             | 30.72         | 0.1132             |
| 1-Nitro-2-phenyl ethane                            | UT                              | 30.81          | 0.1114             | —             | —                  |
| Theaspirane A                                      | T                               | 30.91          | 0.1542             | 30.98         | 0.0634             |
| 522                                                | UT                              | 31.05          | 0.1273             | 31.12         | 0.0501             |
| 523                                                | UT                              | 31.17          | 0.4005             | 31.24         | 0.0855             |
| 1-Methylnaphthalene                                | T                               | 31.39          | 0.1880             | 31.52         | 0.0971             |
| 524                                                | UT                              | 31.37          | 0.4260             | 31.64         | 0.1514             |
| Theaspirane B                                      | T                               | 31.65          | 0.1971             | 31.71         | 0.0877             |
| 525                                                | UT                              | 32.71          | 0.5204             | 32.84         | 0.1662             |
| Heptylcyclohexane                                  | UT                              | 32.64          | 1.1154             | 32.71         | 0.4385             |
| 170                                                | T                               | 32.68          | 0.0580             | 32.75         | 0.0375             |
| Triacetin                                          | UT                              | 32.80          | 0.1582             | 32.87         | 0.0409             |
| 526                                                | UT                              | 32.97          | 0.2614             | 33.04         | 0.0782             |
| 26                                                 | T                               | 33.09          | 1.5689             | 33.16         | 1.4158             |
| Decanoic acid                                      | T                               | 33.40          | 0.1680             | 33.47         | 0.0913             |
| $\gamma$ -Nonalactone                              | T                               | 33.61          | 0.0521             | —             | —                  |
| 527                                                | UT                              | 33.77          | 1.4570             | 33.84         | 0.4936             |
| 528                                                | UT                              | 33.98          | 0.2369             | 34.04         | 0.1099             |
| Butyl benzoate                                     | UT                              | 34.06          | 0.5459             | 34.12         | 0.4584             |
| 3-Hydroxy-2,4,4-trimethylpentyl-2-methylpropanoate | T                               | 34.06          | 0.1122             | 34.13         | 0.0600             |
| (3Z)-Hexenyl hexenoate                             | T                               | 34.25          | 1.0678             | —             | —                  |
| 529                                                | UT                              | 34.44          | 0.5411             | 34.44         | 0.2278             |
| $\beta$ -Cubebene                                  | UT                              | 34.38          | 0.0593             | 34.44         | 0.0239             |
| Hexyl hexanoate                                    | UT                              | 34.45          | 0.0708             | —             | —                  |
| (2E)-Hexenyl caproate                              | UT                              | 34.58          | 0.1576             | —             | —                  |
| 530                                                | UT                              | 34.64          | 0.6903             | 34.71         | 0.2801             |
| 531                                                | UT                              | 34.65          | 0.0175             | 34.71         | 0.0259             |
| $\beta$ -Bourbonene                                | UT                              | 34.78          | 0.1545             | 34.84         | 0.0676             |
| Tetradecane                                        | UT                              | 35.04          | 2.2115             | 35.11         | 0.7495             |
| (Z)-Jasmone                                        | T                               | 35.26          | 0.1465             | —             | —                  |
| Vanillin                                           | T                               | 35.22          | 0.1723             | 35.28         | 0.0377             |
| 532                                                | UT                              | 35.31          | 0.9584             | 35.37         | 0.3244             |
| Dodecanal                                          | T                               | 35.45          | 0.0788             | 35.52         | 0.0257             |
| 534                                                | UT                              | 36.04          | 0.2769             | 36.11         | 0.1012             |
| 533                                                | UT                              | 35.84          | 0.3226             | 35.91         | 0.0893             |
| 535                                                | UT                              | 36.31          | 0.3376             | 36.38         | 0.0613             |
| $\alpha$ -Ionone                                   | T                               | 36.46          | 0.1717             | 36.52         | 0.1024             |
| 536                                                | UT                              | 36.64          | 0.2834             | 36.71         | 0.0806             |

| Compound                                                               | Target (T) /<br>Untargeted (UT) | High Elevation |                    | Low Elevation |                    |
|------------------------------------------------------------------------|---------------------------------|----------------|--------------------|---------------|--------------------|
|                                                                        |                                 | RT             | Relative Response* | RT            | Relative Response* |
| Nonylcyclopentane                                                      | UT                              | 37.17          | 1.0775             | 37.24         | 0.5080             |
| Geranylacetone                                                         | T                               | 37.39          | 0.0584             | 37.45         | 0.0649             |
| 537                                                                    | UT                              | 37.71          | 0.9771             | 37.71         | 0.4554             |
| Dodecanol                                                              | T                               | 37.97          | 0.2047             | 38.04         | 0.1089             |
| Octylbenzene                                                           | UT                              | 37.98          | 0.0363             | 38.05         | 0.0276             |
| 538                                                                    | UT                              | 38.71          | 0.1346             | 38.71         | 0.1060             |
| 539                                                                    | UT                              | 38.91          | 0.4531             | 38.97         | 0.2702             |
| (E)- $\beta$ -Ionone                                                   | T                               | 38.92          | 0.7622             | 38.99         | 0.5114             |
| 5,6-Epoxy- $\beta$ -Ionone                                             | T                               | 38.93          | 0.4072             | 39.00         | 0.3417             |
| Pentadecane                                                            | UT                              | 39.24          | 0.6897             | 39.24         | 0.2839             |
| (E,E)- $\alpha$ -Farnesene                                             | T                               | 39.71          | 0.0452             | —             | —                  |
| 2,4-Di-tert-butylphenol                                                | T                               | 39.86          | 0.0290             | —             | —                  |
| Butylated hydroxytoluene                                               | T                               | 39.98          | 0.2349             | 40.05         | 0.1616             |
| 178                                                                    | T                               | 40.53          | 0.4065             | 40.53         | 0.2498             |
| $\delta$ -Cadinene                                                     | T                               | 40.51          | 0.0402             | —             | —                  |
| cis-Calamenene                                                         | T                               | 40.58          | 0.0592             | —             | —                  |
| Dihydroactinidiolide                                                   | T                               | 40.95          | 0.3877             | 41.02         | 0.3114             |
| 540                                                                    | UT                              | 41.24          | 0.4070             | 41.31         | 0.1446             |
| Nonylcyclohexane                                                       | UT                              | 41.44          | 0.7154             | 41.44         | 0.3210             |
| $\alpha$ -Calacorene                                                   | T                               | 41.38          | 0.0298             | 41.45         | 0.0149             |
| Dodecanoic acid                                                        | T                               | 42.00          | 0.0322             | —             | —                  |
| 541                                                                    | UT                              | 42.11          | 0.4323             | 42.11         | 0.2154             |
| 542                                                                    | UT                              | 42.86          | 0.1212             | 42.92         | 0.0858             |
| Caryophyllene oxide                                                    | T                               | 43.12          | 0.0216             | —             | —                  |
| Hexadecane                                                             | UT                              | 43.31          | 0.5144             | 43.31         | 0.2129             |
| (2,4,4-trimethyl-3-(2-methylpropanoyloxy)pentyl)<br>2-methylpropanoate | T                               | 43.45          | 0.8169             | 43.45         | 0.5154             |
| tau-Muurolol                                                           | T                               | 45.32          | 0.0396             | —             | —                  |
| 543                                                                    | UT                              | 45.44          | 0.2291             | 45.44         | 0.1141             |
| cis-Methyl dihydrojasmonate                                            | T                               | 45.53          | 0.4615             | 45.53         | 0.2354             |
| $\alpha$ -Cadinol                                                      | T                               | 45.79          | 0.0303             | —             | —                  |
| Tetradecanol                                                           | T                               | 46.71          | 0.0294             | 46.77         | 0.0319             |
| 3,4-Diethyl-1,1'-biphenyl                                              | T                               | 46.59          | 0.0480             | 46.65         | 0.0109             |
| Bancroftinone                                                          | UT                              | 47.65          | 0.0307             | —             | —                  |
| Undecylcyclohexane                                                     | UT                              | 49.24          | 0.0742             | 49.31         | 0.0142             |
| Caffeine                                                               | UT                              | 52.42          | 0.6229             | 52.49         | 0.4457             |
| Ethyl acetate                                                          | T                               | —              | —                  | 4.84          | 0.0247             |
| Isoamyl alcohol                                                        | T                               | —              | —                  | 7.23          | 0.0832             |
| (2E)-Pentenal                                                          | T                               | —              | —                  | 7.24          | 0.1036             |
| m-Ethyltoluene                                                         | T                               | —              | —                  | 15.11         | 0.0254             |
| 118                                                                    | T                               | —              | —                  | 24.26         | 0.1061             |

\* Relative response normalized to cis-thujone internal standard response
